# Supplementary material
Source: PubMed Central journal article supplement (PMC4019443)

# Stereocontrol in Palladium-Catalyzed Propargylic Substitutions: Kinetic Resolution to give Enantioenriched 1,5-Enynes and Propargyl Acetates

Michael J. Ardolino, Meredith S. Eno, and James P. Morcken\*

*Department of Chemistry, Merkert Chemistry Center, Boston College, Chestnut Hill, MA 02467*

## Supporting Information

### Table of Contents

|                                                                                                                                      |      |
|--------------------------------------------------------------------------------------------------------------------------------------|------|
| <b>GENERAL INFORMATION</b> .....                                                                                                     | S-2  |
| <b>EXPERIMENTAL PROCEDURES</b> .....                                                                                                 | S-3  |
| Preparation of Substituted Propargyl Acetates.....                                                                                   | S-3  |
| Characterization of Substituted Propargyl Acetates.....                                                                              | S-4  |
| Preparation of [(R)-(+)-2,2'-Bis(di-2-furanylphosphino)-6,6'-dimethoxy<br>-1,1'-biphenyl]palladium(II) dichloride ( <b>3</b> ) ..... | S-7  |
| Experimental Procedure for Resolution of Propargyl Acetates with<br>allylboronic acid pinacol ester (Table 2) .....                  | S-8  |
| Characterization of Products and Stereochemical Analysis.....                                                                        | S-8  |
| Gram-Scale Resolution (Scheme 2, eq 3).....                                                                                          | S-43 |
| Preparation of 2-Methallylboronic acid Pinacol Ester.....                                                                            | S-43 |
| Kinetic resolution to give (R)-4-ethynyl-2-methylnon-1-ene<br>(Scheme 2, eq 4).....                                                  | S-44 |
| Kinetic Isotope Labeling Study.....                                                                                                  | S-46 |
| Experimental Procedures for Resolution of Propargyl Acetates<br>with tetramethylammonium triacetoxyborohydride (Table 3).....        | S-47 |
| Characterization of Products and Stereochemical Analysis.....                                                                        | S-48 |
| Additional Optimization Data.....                                                                                                    | S-54 |
| Computational Information.....                                                                                                       | S-57 |
| <b>SPECTRAL DATA</b> .....                                                                                                           | S-68 |

## General Information

$^1\text{H}$  NMR spectra were recorded on a Varian Gemini-500 (500 MHz) spectrometer. Chemical shifts are reported in ppm with the solvent resonance as the internal standard ( $\text{CDCl}_3$ : 7.26 ppm). Data are reported as follows: chemical shift, integration, multiplicity (s = singlet, d = doublet, t = triplet, q = quartet, p = pentet, br = broad, m = multiplet, app = apparent), and coupling constants (Hz). Coupling constants are reported to the nearest 0.5 Hz.  $^{13}\text{C}$  NMR spectra were recorded on a Varian Gemini-500 (125 MHz) spectrometer with complete proton decoupling. Chemical shifts are reported in ppm with the solvent resonance as the internal standard ( $\text{CDCl}_3$ : 77.0 ppm).  $^{31}\text{P}$  NMR spectra were recorded on a Varian Gemini-500 (202 MHz) spectrometer with complete proton decoupling. Chemical shifts are reported in ppm with phosphoric acid as the external standard ( $\text{H}_3\text{PO}_4$ : 0.0 ppm). Infrared (IR) spectra were recorded on a Bruker alpha spectrophotometer,  $\nu_{\text{max}}$   $\text{cm}^{-1}$ . Bands are characterized as broad (br), strong (s), medium (m), and weak (w). High resolution mass spectrometry (ESI) was performed at the Mass Spectrometry Facility, Boston College.

Liquid Chromatography was performed using forced flow (flash chromatography) on silica gel ( $\text{SiO}_2$ , 230 $\times$ 450 Mesh) purchased from Silicycle. Thin Layer Chromatography was performed on 25  $\mu\text{m}$  silica gel plates purchased from Silicycle. Visualization was performed using ultraviolet light (254 nm), potassium permanganate ( $\text{KMnO}_4$ ) in water, ceric ammonium molybdate (CAM) in water, or phosphomolybdic acid (PMA) in ethanol. Analytical chiral gas-liquid chromatography (GLC) was performed on a Hewlett-Packard 6890 Series chromatograph equipped with a split mode capillary injection system, a flame ionization detector, and a Supelco  $\beta$ -Dex 120 column, or a Supelco Asta ChiralDEX B-DM with helium as the carrier gas. Analytical chiral supercritical fluid chromatography (SFC) was performed on a Thar SFC equipped with a Waters 2998 photodiode array detector and an analytical-2-prep column oven with isopropanol or a 1:1 mixture of isopropanol:hexanes and as the modifier. Optical rotations were measured on a Rudolph Analytical Research Autopol IV Polarimeter.

All reactions were conducted in oven- or flame-dried glassware under an inert atmosphere of nitrogen or argon. Tetrahydrofuran (THF), dichloromethane (DCM) and toluene (PhMe) were purified using a Pure Solv MD-4 solvent purification system from Innovative Technology Inc. by passing through two activated alumina columns after being purged with argon. Triethylamine was distilled from calcium hydride. Tris(dibenzylideneacetone) dipalladium(0) [ $\text{Pd}_2(\text{dba})_3$ ], bis(benzonitrile)palladium(II) chloride, 1,2-bis(diphenylphosphino)benzene, (*R*)-(+)-2,2'-bis(di-2-furanylphosphino)-6,6'-dimethoxy-1,1'-biphenyl [(*R*)-MeO(furyl)BIPHEP], (*S*)-(+)-2,2'-bis(di-2-furanylphosphino)-6,6'-dimethoxy-1,1'-biphenyl [(*S*)-MeO(furyl)BIPHEP],, and (*R,R*)-(-)-2,3-Bis(*t*-butylmethylphosphino)quinoxaline [(*R,R*)-QuinoxP\*] were purchased from Strem Chemicals, Inc. Allylboronic acid pinacol ester (allyl Bpin) was generously donated by Frontier Scientific. Bis(pinacolato) diboron [ $\text{B}_2(\text{pin})_2$ ] was generously donated by Allychem. All other reagents were purchased from either Fisher or Aldrich and used without further purification.

## Experimental Procedures

### Preparation of Substituted Propargyl Acetates

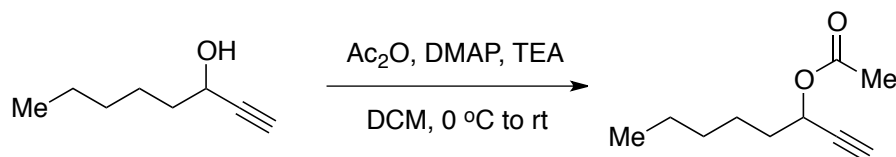

**Representative Procedure A:** An oven-dried round-bottomed flask equipped with a magnetic stir bar was charged with dichloromethane (20.0 mL), 1-octyn-3-ol (500 mg, 3.96 mmol), and dimethylamino pyridine (catalytic) under nitrogen atmosphere. The solution was cooled to 0 °C and triethylamine (1.2 g, 11.88 mmol) was added, followed by dropwise addition of acetic anhydride (484.9 mg, 4.7 mmol). The solution was gradually warmed to room temperature and stirred for 2 h. The reaction was concentrated *in vacuo*, and the crude reaction mixture was purified on silica gel (10:1 pentane:diethyl ether) to afford a clear, colorless oil (599 mg, 90% yield).  $R_f = 0.60$  (10:1 pentane:diethyl ether, stain in PMA). Spectral data is in accordance with the literature.<sup>1</sup>

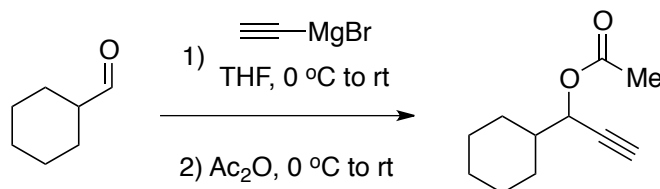

**Representative Procedure B:** An oven-dried round-bottomed flask equipped with a magnetic stir bar was charged with THF (15 mL) and cyclohexyl carboxaldehyde (336 mg, 3.00 mmol). The solution was cooled to 0 °C and ethynylmagnesium bromide (8.4 mL of a 0.5 M solution in THF, 4.2 mmol) was added dropwise. The solution was stirred for 10 minutes at 0 °C and gradually warmed to room temperature and stirred for 45 minutes. The solution was then cooled to 0 °C and acetic anhydride (432.2 mg, 4.2 mmol) was added dropwise. The solution was allowed to stir for 20 minutes at 0 °C and then gradually warmed to room temperature followed by stirring for one hour. The reaction was recooled to 0 °C and quenched with saturated aqueous ammonium chloride and extracted three times with diethyl ether. The organic layers were combined, dried over sodium sulfate, concentrated *in vacuo* and purified on silica gel (30:1 hexane:ethyl acetate) to afford a clear, colorless oil (392 mg, 73% yield).  $R_f = 0.64$  (5:1 hexane:ethyl acetate, stain in PMA). Spectral data is in accordance with the literature.<sup>2</sup>

<sup>1</sup>Ghosh, N.; Nayak, S.; Sahoo, A. *J. Org. Chem.* **2011**, *76*, 500.

<sup>2</sup>Detz, R.; Abiri, Z.; Griel, R.; Hiemstra, H.; Maarseveen, J. *Chem. Eur. J.* **2011**, *21*, 5921.

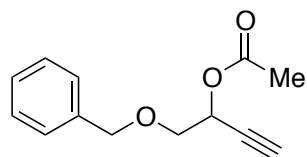

**1-(benzyloxy)but-3-yn-2-yl acetate (Compound SI-1).** From 1-(benzyloxy)but-3-yn-2-ol, prepared as shown below from commercially available 2-(benzyloxy)acetaldehyde, representative procedure **A** was followed to afford a clear, colorless oil (617 mg, 94% yield).  $R_f = 0.6$  (5:1 pentane:diethyl ether, stain in  $KMnO_4$ ). Spectral data is in accordance with the literature.<sup>3</sup>

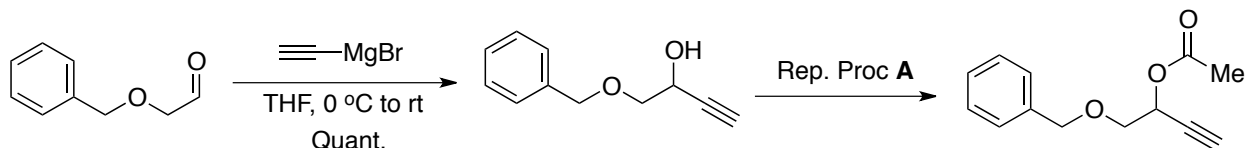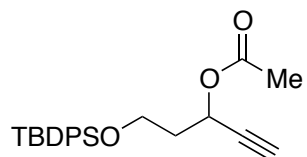

**5-((tert-butyldiphenylsilyl)oxy)pent-1-yn-3-yl acetate (Compound SI-2).** From 3-((tert-butyldiphenylsilyl)oxy)propanal, synthesized as shown below utilizing a two-step procedure from commercially available propane-1,3-diol,<sup>4</sup> representative procedure **B** was followed to afford a clear, colorless oil (279 mg, 74% yield).  $R_f = 0.71$  (10:1 pentane:diethyl ether, stain in PMA). Spectral data is in accordance

with the literature.<sup>3</sup>

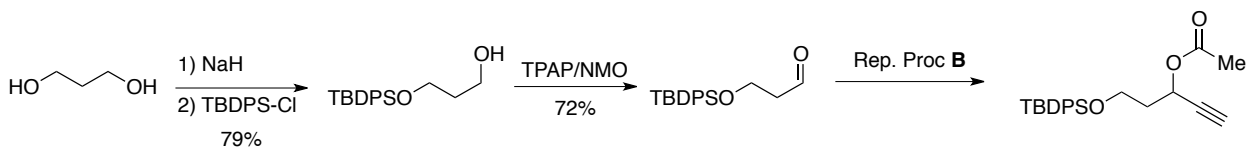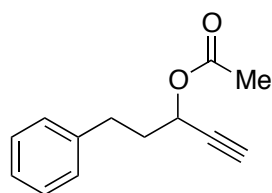

**5-phenylpent-1-yn-3-yl acetate (Compound SI-3).** From commercially available hydrocinnamaldehyde, representative procedure **B** was followed to afford a clear, colorless oil (763 mg, 88% yield).  $R_f = 0.80$  (5:1 pentane:diethyl ether, stain in PMA). Spectral data is in accordance with the literature.<sup>2</sup>

<sup>3</sup>Ardolino, M. J.; Morken, J. P. *J. Am. Chem. Soc.* **2012**, *134*, 8770-8773.

<sup>4</sup>McDougal, P. G.; Rico, J. G.; Oh, Y.-I.; Condon, B. D. *J. Org. Chem.* **1986**, *51*, 3388.



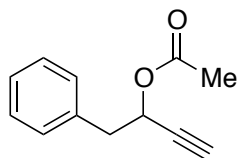

**1-phenylbut-3-yn-2-yl acetate (Compound SI-4).** From 1-phenylbut-3-yn-2-ol, prepared as shown below from commercially available 2-phenylacetaldehyde, representative procedure **A** was followed to afford a clear, colorless oil (297 mg, 79% yield).  $R_f = 0.7$  (5:1 pentane:diethyl ether, stain in PMA). Spectral data is in accordance with the literature.<sup>1</sup>

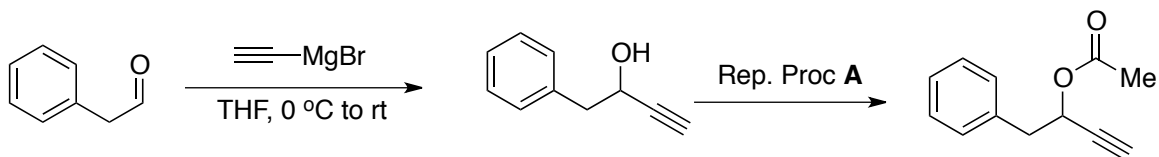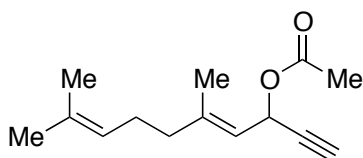

**(E)-5,9-dimethyldeca-4,8-dien-1-yn-3-yl acetate (Compound SI-5).** From (*E*)-3,7-dimethylocta-2,6-dienal, synthesized as shown below from commercially available geraniol,<sup>5</sup> representative procedure **B** was followed to afford a clear, colorless oil (821 mg, 93% yield).  $R_f = 0.83$  (10:1 pentane:diethyl ether, stain in PMA). Spectral data is in accordance with the

literature.<sup>3</sup>

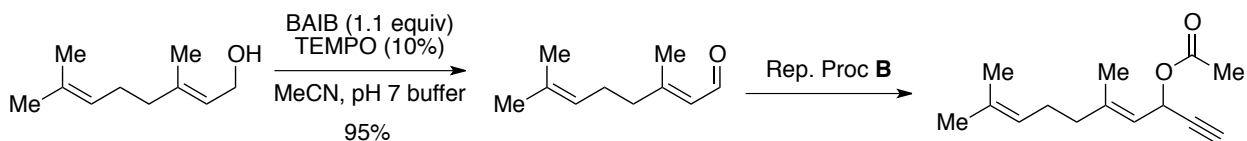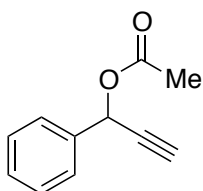

**1-phenylprop-2-yn-1-yl acetate (Compound SI-6).** From commercially available 1-phenylprop-2-yn-1-ol, representative procedure **A** was followed to afford a clear, colorless oil (938 mg, >96% yield).  $R_f = 0.39$  (10:1 pentane:diethyl ether, stain in PMA). Spectral data is in accordance with the literature.<sup>1</sup>

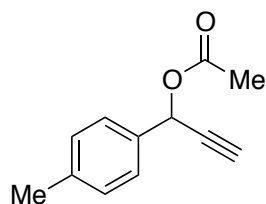

**1-(*p*-tolyl)prop-2-yn-1-yl acetate (Compound SI-7).** From commercially available *p*-tolualdehyde, representative procedure **B** was followed to afford a clear, colorless oil (282 mg, >96% yield).  $R_f = 0.26$  (25:1 hexane:ethyl acetate; stain in PMA). Spectral data is in accordance with literature.<sup>1</sup>

<sup>5</sup>Leonelli, F.; Piancatelli, G. *Org. Syn.* **2009**, *83*, 18.

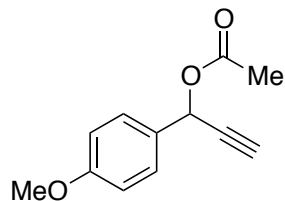

**1-(4-methoxyphenyl)prop-2-yn-1-yl acetate (Compound SI-8).** From commercially available 4-methoxybenzaldehyde, representative procedure **B** was followed. The crude reaction mixture was purified on silica gel (10:1 pentane:diethyl ether) to afford a clear, pale yellow oil (741 mg, >96% yield).  $R_f = 0.4$  (10:1 pentane:diethyl ether; stain in CAM). Spectral data is in accordance with the literature.<sup>2</sup>

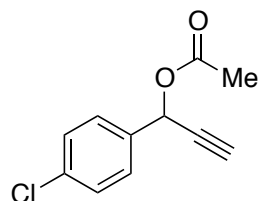

**1-(4-chlorophenyl)prop-2-yn-1-yl acetate (Compound SI-9).** From commercially available 4-chlorobenzaldehyde, representative procedure **B** was followed to afford a clear, pale yellow oil (574 mg, 92% yield).  $R_f = 0.32$  (10:1 hexane: ethyl acetate, stain in PMA). Spectral data is in accordance with the literature.<sup>1</sup>

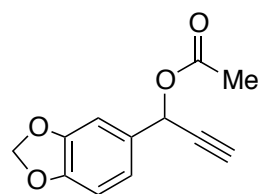

**1-(benzo[d][1,3]dioxol-5-yl)prop-2-yn-1-yl acetate (Compound SI-10).** From commercially available piperonal, representative procedure **B** was followed to afford a white solid (849 mg, >96% yield).  $R_f = 0.14$  (20:1 hexane: ethyl acetate; stain in PMA). Spectral data is in accordance with the literature.<sup>2</sup>

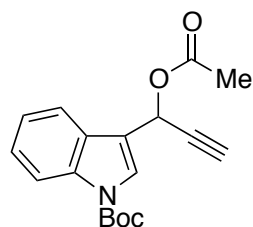

**tert-butyl-3-(1-acetoxyprop-2-yn-1-yl)-1H-indole-1-carboxylate (Compound SI-11).** From *tert*-butyl 3-formyl-1H-indole-1-carboxylate, synthesized as shown below from 1H-indole-3-carbaldehyde, representative procedure **B** was followed to afford a pale brown viscous oil (649 mg, 86% yield).  $R_f = 0.43$  (5:1 pentane:diethyl ether, stain in PMA). Spectral data is in accordance with the literature.<sup>3</sup>

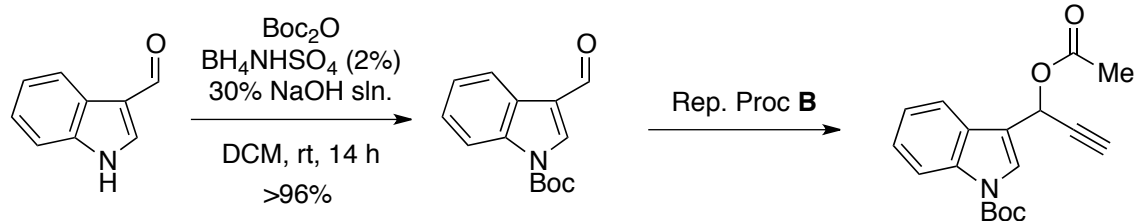

**Preparation of [(*R*)-(+)-2,2'-Bis(di-2-furanylphosphino)-6,6'-dimethoxy-1,1'-biphenyl]palladium(II) dichloride (**3**).<sup>6</sup>**

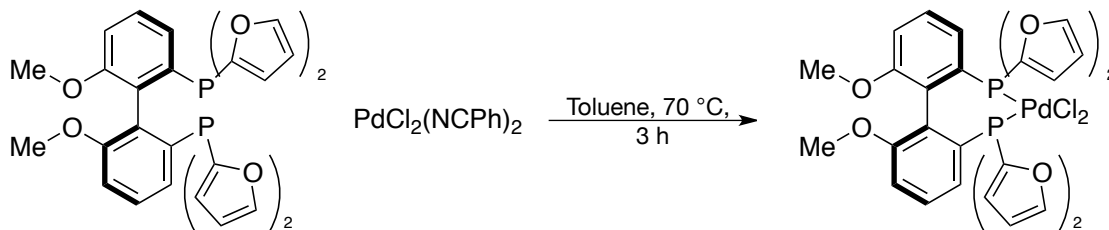

An oven-dried round-bottomed flask equipped with a magnetic stir bar was charged with bis(benzonitrile)palladium(II) chloride (83.9 mg, .219 mmol) and toluene (12.0 mL) in a dry-box under argon atmosphere to form a rust-brown solution. Also in the dry-box, an oven-dried 2 dram vial equipped with a magnetic stir bar was charged with (*R*)-(+)-2,2'-Bis(di-2-furanylphosphino)-6,6'-dimethoxy-1,1'-biphenyl [(*R*)-Methoxy(furyl)BIPHEP] and toluene (3.0 mL). Both vessels were sealed with septa, removed from the dry box, and heated to 70 °C with stirring under a positive pressure of dry nitrogen. The solution of ligand was added dropwise to the stirring solution of palladium complex over five minutes. The solution was stirred for three hours, over the course of which a bright yellow precipitate formed. The solution was slowly cooled to room temperature, and additional solids were crashed out of solution with the addition of 30 mL pentane. The solids were filtered away from the solution in a Buchner funnel with filter paper and washed with cold diethyl ether to yield a fine, dull yellow powder. This powder was dried for 12 hours under high-vacuum at 60 °C to yield a bright yellow powder (106 mg, 67% yield). The catalyst complex was effective without any further purification. [(*S*)-(+)-2,2'-Bis(di-2-furanylphosphino)-6,6'-dimethoxy-1,1'-biphenyl]palladium(II) dichloride was prepared utilizing the same method with (*S*)-(+)-2,2'-Bis(di-2-furanylphosphino)-6,6'-dimethoxy-1,1'-biphenyl [(*S*)-Methoxy(furyl)BIPHEP].

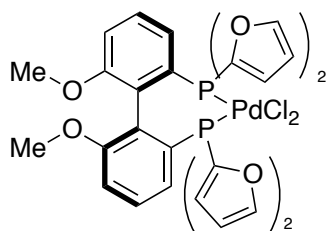

**[(*R*)-(+)-2,2'-Bis(di-2-furanylphosphino)-6,6'-dimethoxy-1,1'-biphenyl]palladium(II) dichloride (**3**).**

<sup>1</sup>H NMR (500 MHz, CDCl<sub>3</sub>): δ 7.80 (2H, s), 7.483 (2H, s), 7.22 (2H, dd, *J* = 3.0 Hz, 3.0 Hz), 7.16 (2H, ddd, *J* = 8.0 Hz, 8.0 Hz, 3.0 Hz), 6.93 (2H, d, *J* = 3.0 Hz), 6.85 (2H, dd, *J* = 12.5 Hz, 8.0 Hz), 6.76 (2H, d, *J* = 8.0 Hz), 6.45 (2H, ddd, *J* = 3.0 Hz, 1.5 Hz, 1.5 Hz), 6.24-6.43 (2H, m), 3.60 (6H, s); <sup>31</sup>P NMR (202 MHz, CDCl<sub>3</sub>): δ -11.56; IR (neat): 3109 (m), 3084 (m), 2937 (m), 2835 (w), 2228 (m), 1461 (s), 1267 (s), 1010 (s); A

crystal structure of this catalyst complex has also been previously reported.<sup>7</sup>

<sup>6</sup> Modified from: Sperrie, M.; Consiglio, G. *J. Am. Chem. Soc.* **1995**, *117*, 12130.

<sup>7</sup> Brozek, L. A.; Ardolino, M. J.; Morken, J. P. *J. Am. Chem. Soc.* **2011**, *133*, 16778.

## Representative Procedure for Resolution of Propargyl Acetates with Allylboronic acid Pinacol Ester [allyl B(pin)].

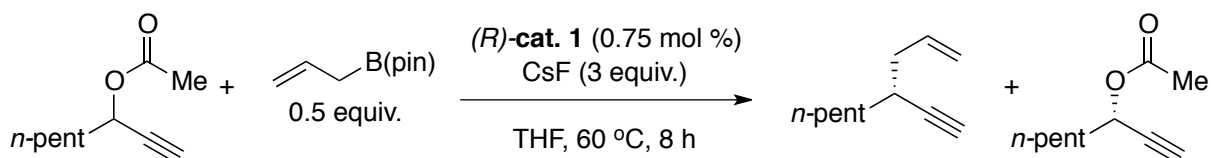

An oven-dried scintillation vial equipped with a magnetic stir bar was charged successively with [(*R*)-(+)-2,2'-Bis(di-2-furanylphosphino)-6,6'-dimethoxy-1,1'-biphenyl]palladium(II) dichloride (2.16 mg, 3.0  $\mu$ mol), THF (0.8 mL), oct-1-yn-3-yl acetate (67.3 mg, 0.40 mmol), allylboronic acid pinacol ester (33.6 mg, 0.20 mmol), and cesium fluoride (182.3 mg, 1.2 mmol) in a dry-box under argon atmosphere. The vial was sealed, removed from the dry-box, and heated to 60 °C while allowing to stir for 8 h. After this time, the reaction mixture was diluted with diethyl ether, filtered through a plug of silica gel and concentrated *in vacuo*.

## Characterization of Products and Analysis of Stereochemistry

**Kinetic resolution to give (*R*)-4-ethynylnon-1-ene (Table 2, Entry 1):** The representative procedure was followed with oct-1-yn-3-yl acetate.

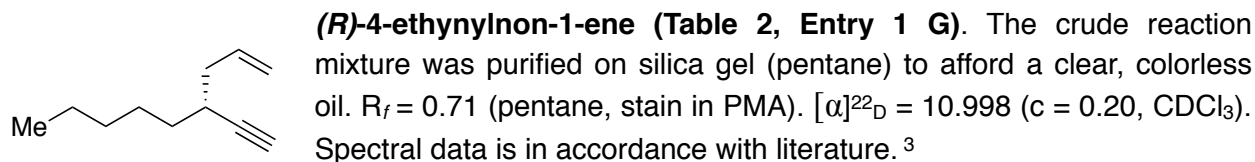

### Analysis of Stereochemistry:

Optical purity was determined by GLC analysis of the title compound as compared to racemic product. The absolute stereochemistry was assigned as shown below.

Chiral GLC (CD-BDM, Supelco, 40 °C for 30 min, ramp 0.25 °C/min to 50 °C for 10 min, 20 psi)  
 - analysis of title compound.

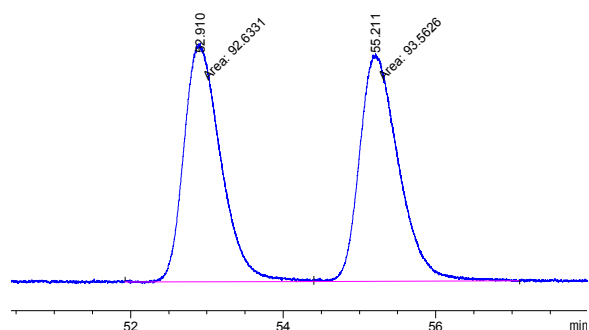

Racemic Sample

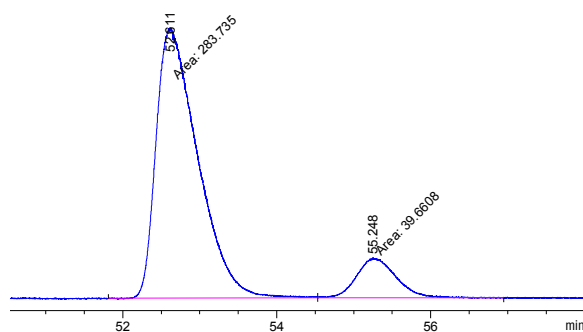

Enantioenriched Sample

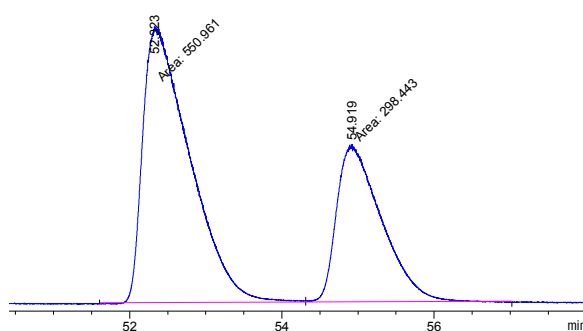

co-injection of racemic and enantioenriched samples

| Peak # | RetTime [min] | Type | Width [min] | Area [pA*s] | Height [pA] | Area %   |
|--------|---------------|------|-------------|-------------|-------------|----------|
| 1      | 52.611        | MF   | 0.6246      | 283.73468   | 7.57123     | 87.73612 |
| 2      | 55.248        | FM   | 0.5893      | 39.66084    | 1.12167     | 12.26388 |

### Proof of Absolute Stereochemistry:

In order to determine the absolute stereochemistry, the title compound was compared by GLC analysis to authentic (*R*)-4-ethynylnon-1-ene, prepared by the stereospecific enyne cross coupling as depicted below.<sup>3</sup>

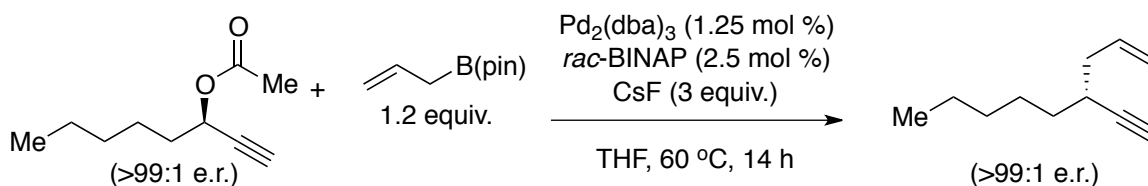

Chiral GLC (CD-BDM, Supelco, 40 °C for 30 min, ramp 0.25 °C/min to 50 °C for 10 min, 20 psi)  
- analysis of title compound.

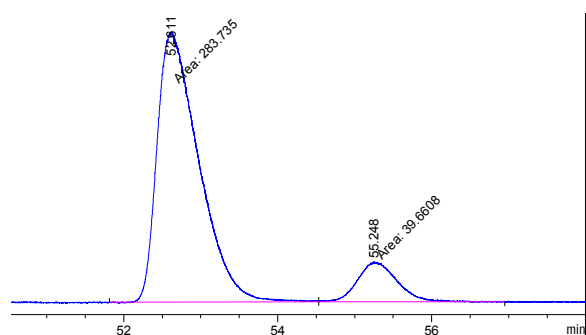

Title Compound

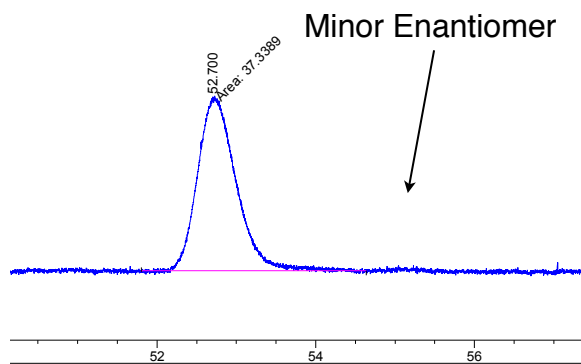

authentic (R)-4-ethynylnon-1-ene

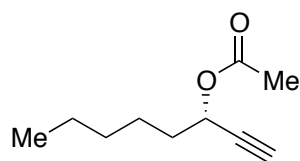

**(S)-oct-1-yn-3-yl acetate (Table 2, Entry 1 I).** The crude reaction mixture was purified on silica gel (pentane) to afford a clear, colorless oil.  $R_f = 0.60$  (10:1 pentane: diethyl ether, stain in PMA).  $[\alpha]_D^{22} = -19.090$  ( $c = 1.06$ ,  $\text{CDCl}_3$ ). Spectral data is in accordance with literature.<sup>1</sup>

### Analysis of Stereochemistry:

Optical purity was determined by GLC analysis of the title compound as compared to racemic product. The absolute stereochemistry was assigned as shown below.

Chiral GLC ( $\beta$ -dex, Supelco, 60 °C for 10 min, ramp 5 °C/min to 140 °C for 10 min, 20 psi) - analysis of title compound.

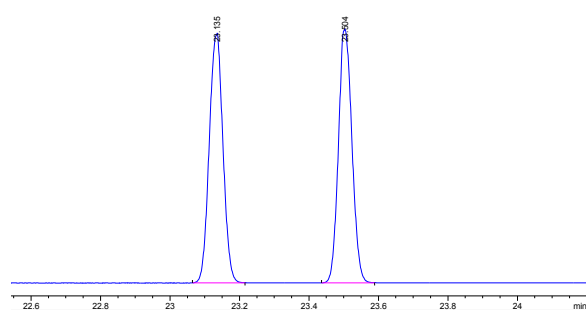

Racemic Sample

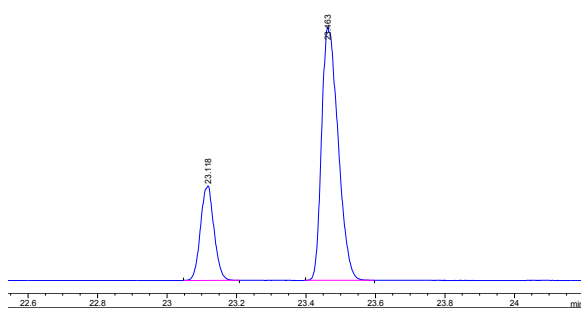

Enantioenriched Sample

| Peak # | RetTime [min] | Type | Width [min] | Area [pA*s] | Height [pA] | Area %   |
|--------|---------------|------|-------------|-------------|-------------|----------|
| 1      | 23.118        | BB   | 0.0346      | 168.23032   | 62.15095    | 23.41013 |
| 2      | 23.463        | BB   | 0.0412      | 550.39166   | 166.93874   | 76.58987 |

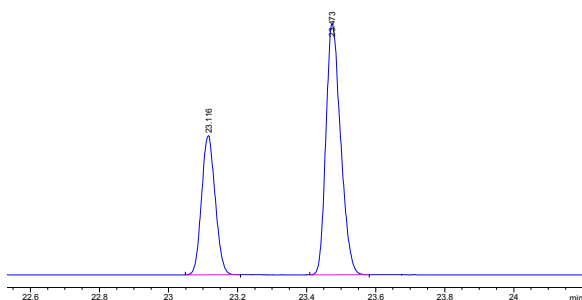

*co-injection of racemic and enantioenriched samples*

**Proof of Absolute Stereochemistry:**

In order to determine the absolute stereochemistry, the title compound was compared by GLC analysis to authentic (*R*)-oct-1-yn-3-yl acetate prepared from commercially available (*R*)-oct-1-yn-3-ol as shown below.

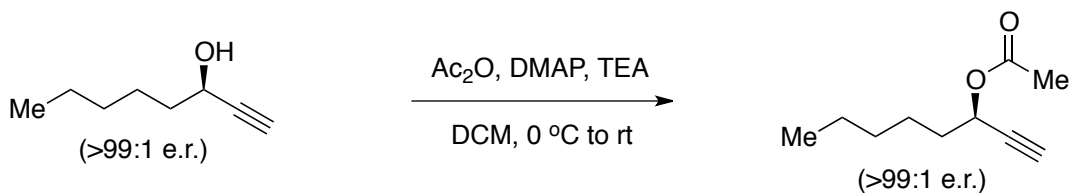

Chiral GLC ( $\beta$ -dex, Supelco, 60 °C for 10 min, ramp 5 °C/min to 140 °C for 10 min, 20 psi) - analysis of title compound.

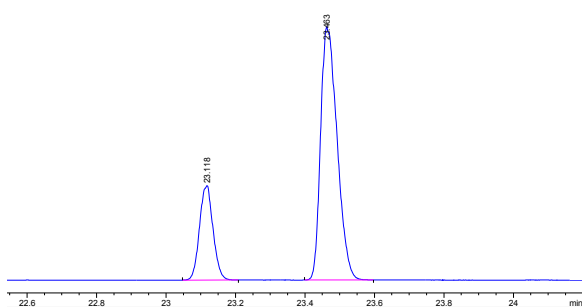

Title Compound

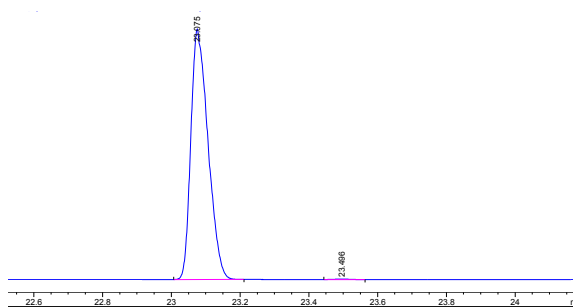

(*R*)-oct-1-yn-3-yl acetate

**Kinetic resolution to give (*R*)-(((2-ethynylpent-4-en-1-yl)oxy)methyl)benzene (Table 2, Entry 2):** The representative procedure was followed with 1-(benzyloxy)but-3-yn-2-yl acetate on a 0.2 mmol scale.

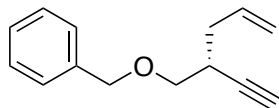

**(*R*)-(((2-ethynylpent-4-en-1-yl)oxy)methyl)benzene (Table 2, Entry 2 G).** The crude reaction mixture was purified on silica gel (10:1 pentane:diethyl ether) to afford a clear, colorless oil.  $R_f = 0.86$  (10:1 pentane:diethyl ether, stain in  $\text{KMNO}_4$ ).  $[\alpha]_D^{22} = -8.461$  ( $c = 0.73$ ,  $\text{CHCl}_3$ ). Spectral data is in accordance with the literature.<sup>3</sup>

### Analysis of Stereochemistry:

Optical purity was determined by SFC analysis of the title compound as compared to racemic product. The absolute stereochemistry was assigned by analogy to (*R*)-4-ethynylnon-1-ene (Table 2, Entry 1 G).

*Chiral SFC (OJ-H, Chiralpak, 215 nm, 1.0 mL/min, 1.0% 1:1 i-PrOH:Hexanes, 100 bar, 35 °C) - analysis of title compound.*

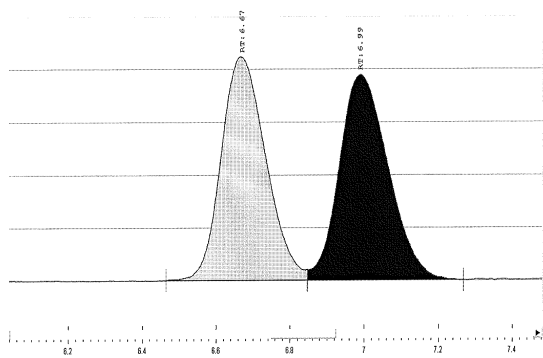

*Racemic Sample*

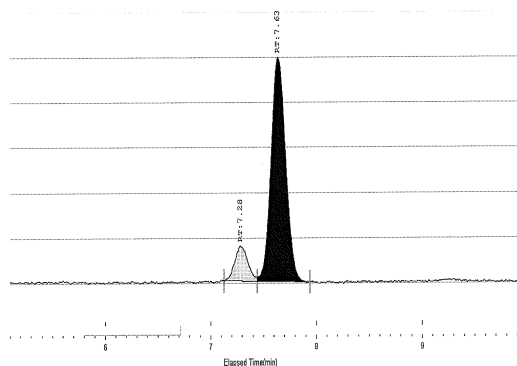

*Enantioenriched Sample*

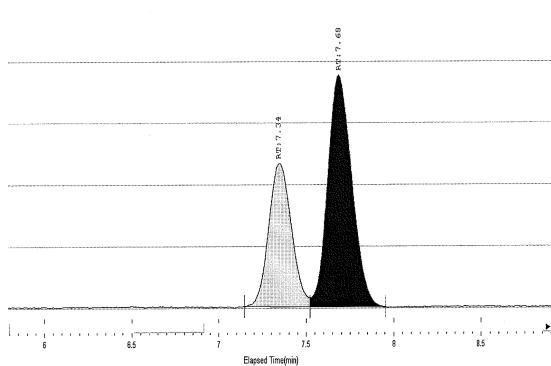

*co-injection of racemic and enantioenriched samples*

| Peak No | % Area  | Area      | RT (min) |
|---------|---------|-----------|----------|
| 1       | 12.1609 | 133.3423  | 7.28     |
| 2       | 87.8391 | 963.1384  | 7.63     |
| Total:  | 100     | 1096.4807 |          |



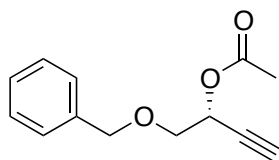

**(R)-1-(benzyloxy)but-3-yn-2-yl acetate (Table 2, Entry 2 I).** The crude reaction mixture was purified on silica gel (10:1 pentane:diethyl ether) to afford a clear, colorless oil.  $R_f = 0.24$  (10:1 pentane:diethyl ether, stain in  $KMNO_4$ ).  $[\alpha]^{22}_D = -28.339$  ( $c = 10.76$ ,  $KMNO_4$ ). Spectral data is in accordance with the literature.<sup>3</sup>

### Analysis of Stereochemistry:

Optical purity was determined by GLC analysis of the title compound as compared to racemic product. The absolute stereochemistry was assigned by analogy to (*S*)-oct-1-yn-3-yl acetate (Table 2, Entry 1 I).

Chiral GLC ( $\beta$ -dex, Supelco, 60 °C for 10 min, ramp 5 °C/min to 160 °C for 20 min, 20 psi) - analysis of title compound.

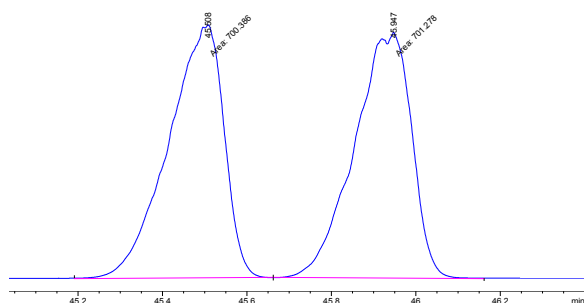

Racemic Sample

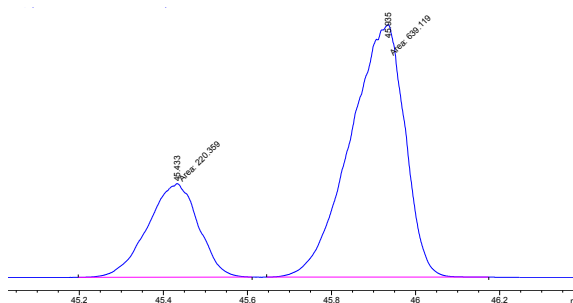

Enantioenriched Sample

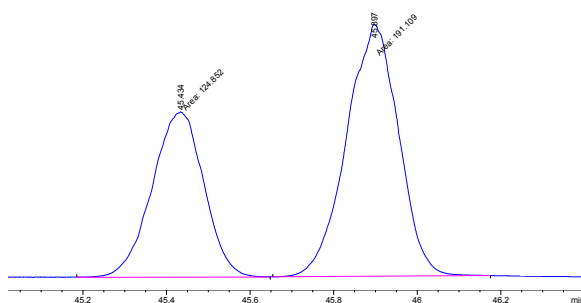

co-injection of racemic and enantioenriched samples

| Peak # | RetTime [min] | Type | Width [min] | Area [pA*s] | Height [pA] | Area %   |
|--------|---------------|------|-------------|-------------|-------------|----------|
| 1      | 45.433        | MM   | 0.1399      | 220.35901   | 26.25463    | 25.63870 |
| 2      | 45.935        | MM   | 0.1506      | 639.11896   | 70.73759    | 74.36130 |

**Kinetic resolution to give (*S*)-tert-butyl((3-ethynylhex-5-en-1-yl)oxy)diphenylsilane (Table 2, Entry 3):** The representative procedure was followed with 5-((tert-butylidiphenylsilyl)oxy)pent-1-yn-3-yl acetate with the following modification: the reaction was run for 12 hours on a 0.2 mmol scale.

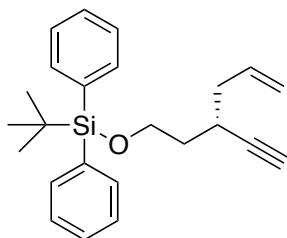

**(*S*)-tert-butyl((3-ethynylhex-5-en-1-yl)oxy)diphenylsilane (Table 2, Entry 3 G).** The crude reaction mixture was purified on silica gel (10:1 pentane:diethyl ether) to afford a clear, colorless oil.  $R_f = 0.95$  (10:1 pentane:diethyl ether, stain in  $\text{KMNO}_4$ ).  $[\alpha]^{22}_{\text{D}} = 13.981$  ( $c = 1.52$ ,  $\text{CHCl}_3$ ). Spectral data is in accordance with the literature.<sup>3</sup>

**Analysis of Stereochemistry:**

The absolute stereochemistry was assigned by analogy to (*R*)-4-ethynylnon-1-ene (Table 2, Entry 1 G).

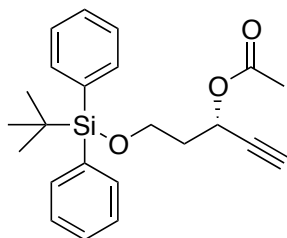

**(*S*)-5-((tert-butylidiphenylsilyl)oxy)pent-1-yn-3-yl acetate (Table 2, Entry 3 I).** The crude reaction mixture was purified on silica gel (10:1 pentane:diethyl ether) to afford a clear, colorless oil.  $R_f = 0.35$  (10:1 pentane:diethyl ether, stain in  $\text{KMNO}_4$ ).  $[\alpha]^{22}_{\text{D}} = -18.147$  ( $c = 1.52$ ,  $\text{CHCl}_3$ ). Spectral data is in accordance with the literature.<sup>3</sup>

**Analysis of Stereochemistry:**

Optical purity was determined by SFC analysis of the title compound as compared to racemic product. The absolute stereochemistry was assigned by analogy to (*S*)-oct-1-yn-3-yl acetate (Table 2, Entry 1 I).

Chiral SFC (OJ-H, Chiralpak, 215 nm, 5.0 mL/min, 1.0% 1:1 *i*-PrOH:Hexanes, 100 bar, 35 °C) - analysis of title compound.

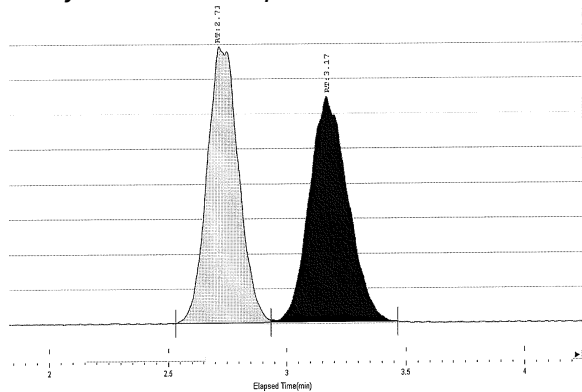

Racemic Sample

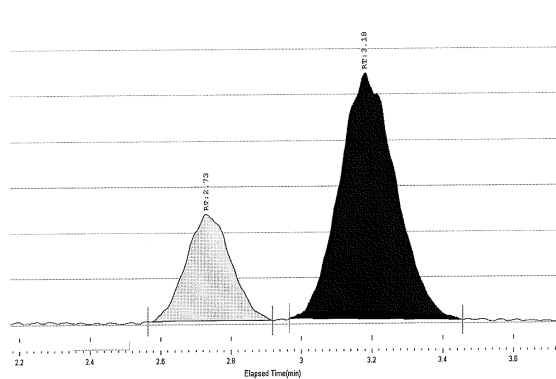

Enantioenriched Sample

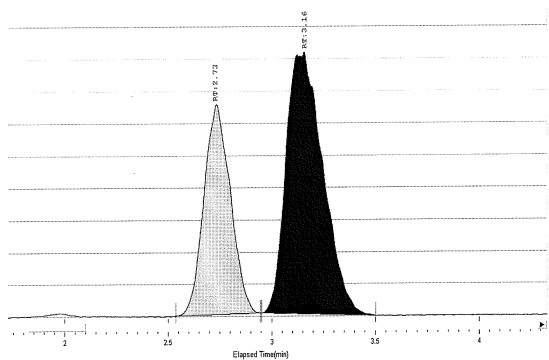

co-injection of racemic and enantioenriched samples

| Peak Info | Number    | Concentration | Area %   | Area      | Area Sum |
|-----------|-----------|---------------|----------|-----------|----------|
| Peak1     | 1         | 0             | 25.8179  | 1036.9514 |          |
| Peak2     | 2         | 0             | 74.1821  | 2979.4555 | 4016.407 |
| RT (min)  | St. (min) | End (min)     | Height   |           |          |
| 2.73      | 2.5644    | 2.9162        | 116.5486 |           |          |
| 3.18      | 2.9661    | 3.4545        | 268.681  |           |          |

**Kinetic resolution to give (*R*)-(3-ethynylhex-5-en-1-yl)benzene (Table 2, Entry 4):** The representative procedure was followed with 5-phenylpent-1-yn-3-yl acetate on a 0.2 mmol scale.

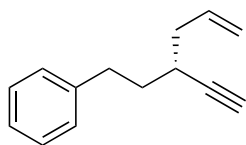

**(*R*)-(3-ethynylhex-5-en-1-yl)benzene (Table 2, Entry 4 G).** The crude reaction mixture was purified on silica gel (pentane) to afford a clear, colorless oil.  $R_f = 0.37$  (pentane, stain in PMA).  $[\alpha]_D^{22} = 34.614$  ( $c = 0.58$ ,  $\text{CHCl}_3$ ). Spectral data is in accordance with the literature.<sup>3</sup>

#### Analysis of Stereochemistry:

The absolute stereochemistry was assigned by analogy to (*R*)-4-ethynylnon-1-ene (Table 2, Entry 1 G).

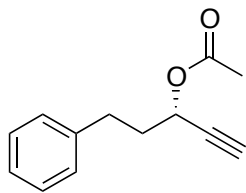

**(S)-5-phenylpent-1-yn-3-yl acetate (Table 2, Entry 4 I).** The crude reaction mixture was purified on silica gel (10:1 pentane: diethyl ether) to afford a clear, colorless oil.  $R_f = 0.21$  (15:1 hexane: ethyl acetate, stain in PMA).  $[\alpha]_D^{22} = -9.086$  ( $c = 0.63$ ,  $\text{CHCl}_3$ ). Spectral data is in accordance with the literature.<sup>2</sup>

### Analysis of Stereochemistry:

Optical purity was determined by GLC analysis of the title compound as compared to racemic product. The absolute stereochemistry was assigned by analogy to (*S*)-oct-1-yn-3-yl acetate (Table 2, Entry 1 I).

Chiral GLC ( $\beta$ -dex, Supelco, 60 °C for 10 min, ramp 4 °C/min to 160 °C for 10 min, 20 psi) - analysis of title compound.

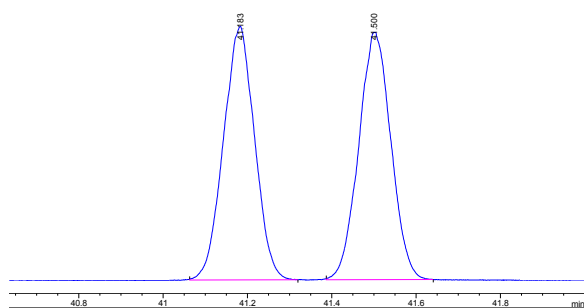

Racemic Sample

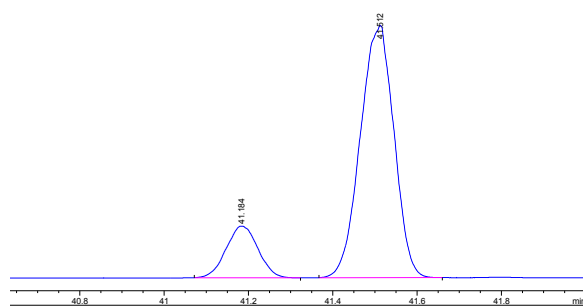

Enantioenriched Sample

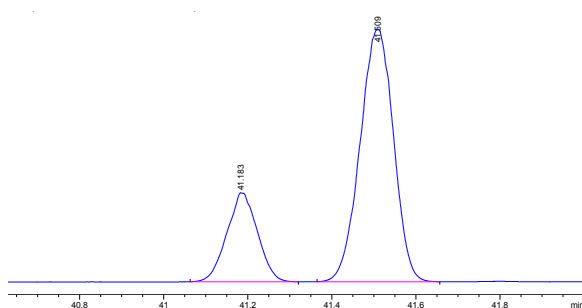

co-injection of racemic and enantioenriched samples

| Peak # | RetTime [min] | Type | Width [min] | Area [pA*s] | Height [pA] | Area %   |
|--------|---------------|------|-------------|-------------|-------------|----------|
| 1      | 41.184        | BB   | 0.0661      | 60.81909    | 11.52059    | 16.33605 |
| 2      | 41.512        | BB   | 0.0657      | 311.48068   | 56.19104    | 83.66395 |

**Kinetic resolution to give (S)-(2-ethynylpent-4-en-1-yl)benzene (Table 2, Entry 5):** The representative procedure was followed with 1-phenylbut-3-yn-2-yl acetate on a 0.2 mmol scale.

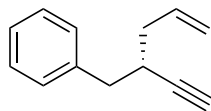

**(S)-(2-ethynylpent-4-en-1-yl)benzene (Table 2, Entry 5 G).**  $^1\text{H}$  NMR (500 MHz,  $\text{CDCl}_3$ ):  $\delta$  7.28-7.32 (2H, m), 7.21-7.25 (3H, m), 5.92 (1H, dddd (app dtt),  $J = 17.0$  Hz, 8.5 Hz, 7.0 Hz, 7.0 Hz, 1.0 Hz), 5.12-5.13 (1H, m), 5.10 (1H, m), 2.79-2.80 (2H, m), 2.70 (1H, dddd (app dtd),  $J = 8.5$  Hz, 8.5 Hz, 6.5 Hz, 6.5 Hz, 2.5 Hz), 2.25 (2H, m), 2.10 (1H, d,  $J = 2.5$  Hz);  $^{13}\text{C}$  NMR (125 MHz,  $\text{CDCl}_3$ ):  $\delta$  139.2, 135.5, 129.2, 129.2, 128.2, 128.2, 126.4, 117.0, 86.6, 70.4, 40.5, 38.4, 33.3; IR (neat): 3300 (w), 3064 (m), 3028 (m), 2979 (m), 2924 (m), 2858 (w), 1641 (m), 1604 (m), 1495 (m), 1441 (m), 915 (s), 698 (s), 632 (s)  $\text{cm}^{-1}$ ; HRMS-(ESI+) for  $\text{C}_{13}\text{H}_{15}$  [M+H] $^+$ : calculated: 171.1174, found: 171.1176.  $[\alpha]_D^{22} = 3.214$  ( $c = 0.53$ ,  $\text{CDCl}_3$ ). The crude reaction was purified on silica gel (pentane) to afford colorless oil.  $R_f = 0.21$  (pentane; stain in PMA).

### Analysis of Stereochemistry:

Optical purity was determined by SFC analysis of the title compound as compared to racemic product. The absolute stereochemistry was assigned by analogy to (*R*)-4-ethynylnon-1-ene (Table 2, Entry 1 G).

*Chiral SFC (OJ-H, Chiralpak, 215 nm, 3.0 mL/min, 1.5% i-PrOH, 100 bar, 35 °C) - analysis of title compound.*

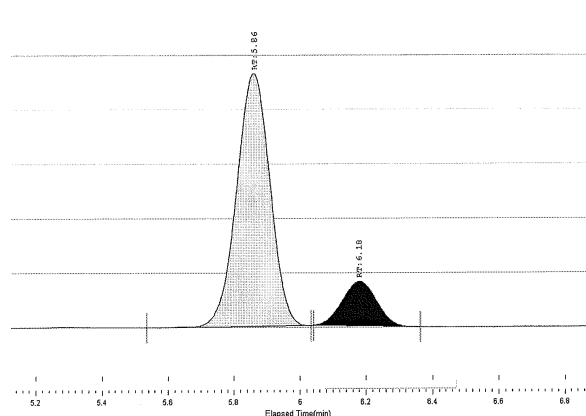

*Racemic Sample*

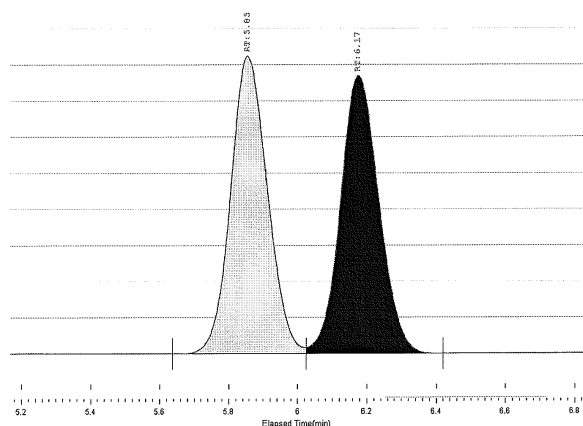

*Enantioenriched Sample*

| Peak No | % Area  | Area      | RT (min) |
|---------|---------|-----------|----------|
| 1       | 84.6896 | 3257.8362 | 5.86     |
| 2       | 15.3104 | 588.9614  | 6.18     |
| Total:  | 100     | 3846.7976 |          |

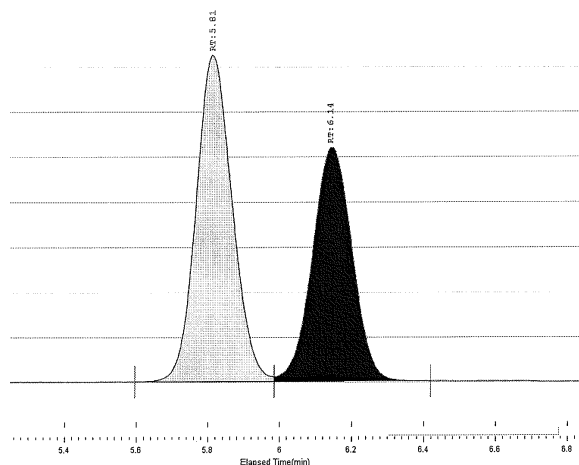

*co-injection of racemic and enantioenriched samples*

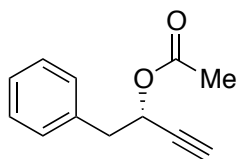

**(S)-1-phenylbut-3-yn-2-yl acetate (Table 2, Entry 5 I).** The crude reaction mixture was purified on silica gel (10:1 pentane: diethyl ether) to afford a clear, colorless oil.  $R_f = 0.7$  (5:1 pentane: diethyl ether; stain in PMA).  $[\alpha]_D^{22} = -7.968$  ( $c = 1.33$ ,  $\text{CDCl}_3$ ). Spectral data is in accordance with the literature.<sup>1</sup>

**Analysis of Stereochemistry:**

Optical purity was determined by GLC analysis of the title compound as compared to racemic product. The absolute stereochemistry was assigned by analogy to (S)-oct-1-yn-3-yl acetate (Table 2, Entry 1 I).

*Chiral GLC ( $\beta$ -dex, Supelco, 100 °C for 10 min, ramp 3 °C/min to 160 °C for 10 min, 20 psi) - analysis of title compound.*

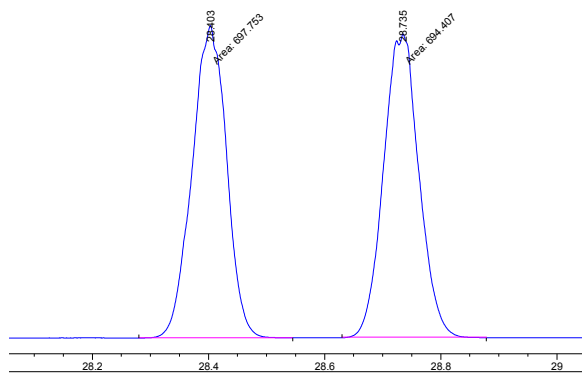

*Racemic Sample*

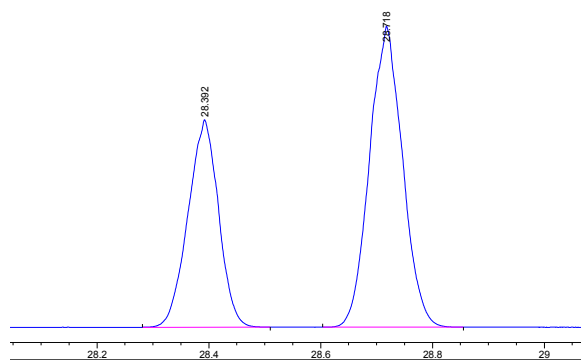

*Enantioenriched Sample*

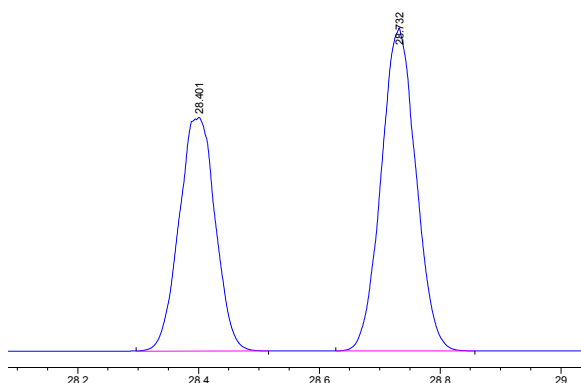

| Peak # | RetTime [min] | Type | Width [min] | Area [pA*s] | Height [pA] | Area %   |
|--------|---------------|------|-------------|-------------|-------------|----------|
| 1      | 28.392        | BB   | 0.0471      | 436.78180   | 114.99051   | 38.95276 |
| 2      | 28.718        | BB   | 0.0499      | 684.52972   | 166.75691   | 61.04724 |

*co-injection of racemic and enantioenriched samples*

**Kinetic resolution to give (*S,E*)-4-ethynyl-6,10-dimethylundeca-1,5,9-triene (Table 2, Entry 6):** The representative procedure was followed with (*E*)-5,9-dimethyldeca-4,8-dien-1-yn-3-yl acetate with the following modification: the reaction was run for 1.5 hours at 0.5% catalyst loading on a 0.2 mmol scale.

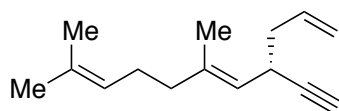

**(*S,E*)-4-ethynyl-6,10-dimethylundeca-1,5,9-triene (Table 2, Entry 6 G).** The crude reaction mixture was purified on silica gel (20:1 pentane: diethyl ether) to afford a clear, pale yellow oil.  $R_f = 0.97$  (20:1 pentane: diethyl ether, stain in  $\text{KMnO}_4$ ).  $[\alpha]_D^{22} = 32.525$  ( $c = 0.79$ ,  $\text{CHCl}_3$ ). Spectral data is in accordance with the literature.

3

**Analysis of Stereochemistry:**

Optical purity was determined by GLC analysis of the title compound as compared to racemic product. The absolute stereochemistry was assigned by analogy to (*R*)-4-ethynylnon-1-ene (Table 2, Entry 1 G).

Chiral GLC ( $\beta$ -dex, Supelco, 60 °C for 10 min, ramp 1 °C/min to 140 °C for 40 min, 20 psi) - analysis of title compound.

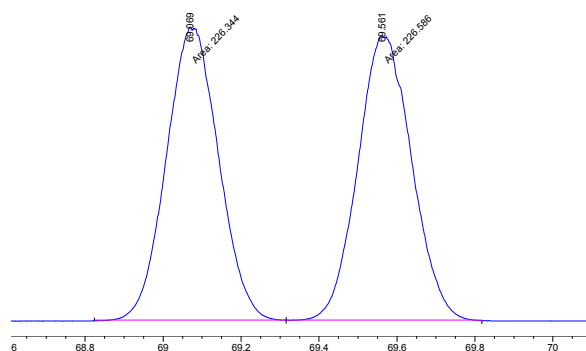

*Racemic Sample*

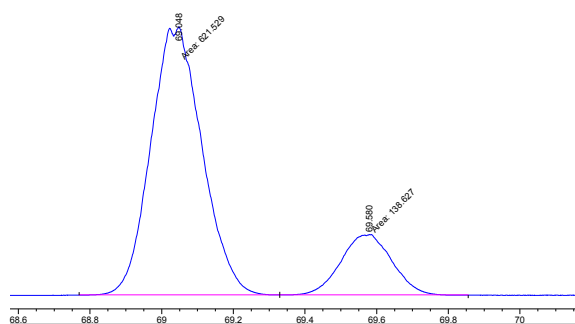

*Enantioenriched Sample*

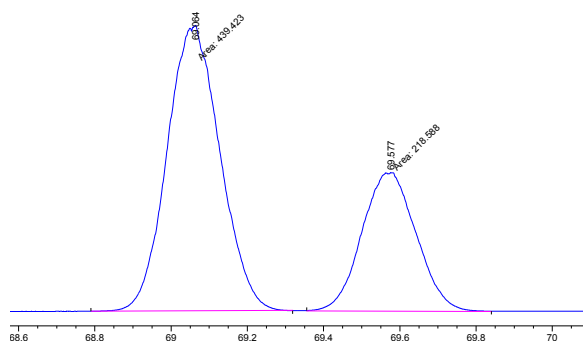

*co-injection of racemic and enantioenriched samples*

| Peak # | RetTime [min] | Type | Width [min] | Area [pA*s] | Height [pA] | Area %   |
|--------|---------------|------|-------------|-------------|-------------|----------|
| 1      | 69.048        | MM   | 0.1661      | 621.52887   | 62.35764    | 81.76338 |
| 2      | 69.580        | MM   | 0.1646      | 138.62669   | 14.03614    | 18.23662 |

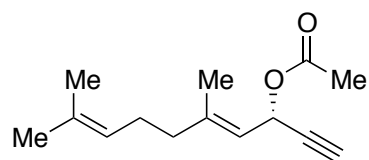

literature.<sup>3</sup>

**(S,E)-5,9-dimethyldeca-4,8-dien-1-yn-3-yl acetate (Table 2, Entry 6 I).** The crude reaction mixture was purified on silica gel (20:1 pentane: diethyl ether) to afford a clear, pale yellow oil.  $R_f = 0.49$  (20:1 pentane: diethyl ether, stain in  $KMnO_4$ ).  $[\alpha]_D^{22} = 15.497$  ( $c = 1.12$ ,  $CHCl_3$ ). Spectral data is in accordance with the

### **Analysis of Stereochemistry:**

Optical purity was determined by GLC analysis of the title compound as compared to racemic product. The absolute stereochemistry was assigned by analogy to (S)-oct-1-yn-3-yl acetate (Table 2, Entry 1 I).



Chiral GLC ( $\beta$ -dex, Supelco, 80 °C for 10 min, ramp 1 °C/min to 160 °C for 10 min, 20 psi) - analysis of title compound.

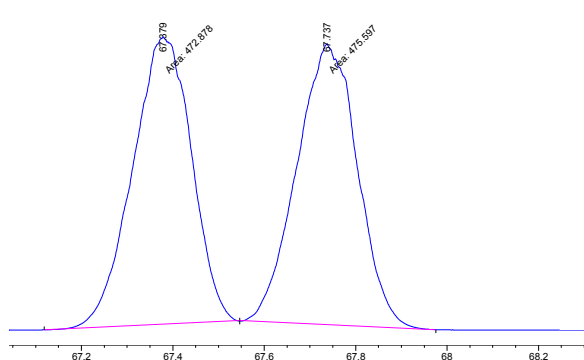

*Racemic Sample*

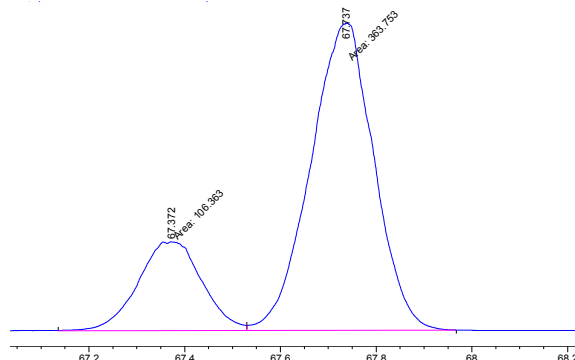

*Enantioenriched Sample*

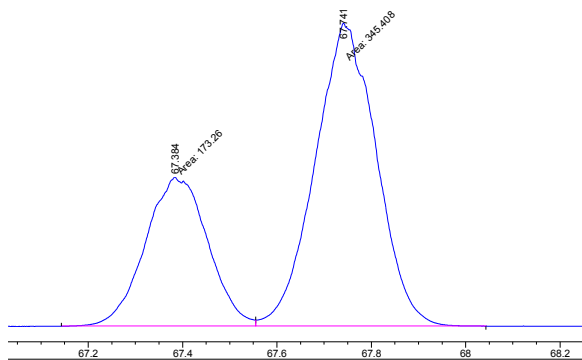

*co-injection of racemic and enantioenriched samples*

| Peak # | RetTime [min] | Type | Width [min] | Area [pA*s] | Height [pA] | Area %   |
|--------|---------------|------|-------------|-------------|-------------|----------|
| 1      | 67.372        | MF   | 0.1552      | 106.36320   | 11.42260    | 22.62488 |
| 2      | 67.737        | FM   | 0.1532      | 363.75287   | 39.56961    | 77.37512 |

**Kinetic resolution to give (S)-hex-5-en-1-yn-3-ylcyclohexane (Table 2, Entry 7):** The representative procedure was followed with 1-cyclohexylprop-2-yn-1-yl acetate on a 0.2 mmol scale.

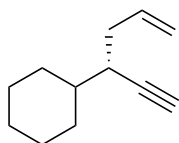

**(S)-hex-5-en-1-yn-3-ylcyclohexane (Table 2, Entry 7 G).** The crude reaction mixture was purified on silica gel (pentane) to afford a clear, colorless oil.  $R_f = 0.64$  (5:1 hexane: ethyl acetate, stain in PMA).  $[\alpha]_D^{22} = 6.163$  ( $c = 0.31$ ,  $\text{CHCl}_3$ ). Spectral data is in accordance with the literature.<sup>3</sup>

#### **Analysis of Stereochemistry:**

Optical purity was determined by GLC analysis of the title compound as compared to racemic product. The absolute stereochemistry was assigned by analogy to (*R*)-4-ethynylnon-1-ene (Table 2, Entry 1 G).

Chiral GLC ( $\beta$ -dex, Supelco, 60 °C for 10 min, ramp 1 °C/min to 140 °C for 10 min, 20 psi) - analysis of title compound.

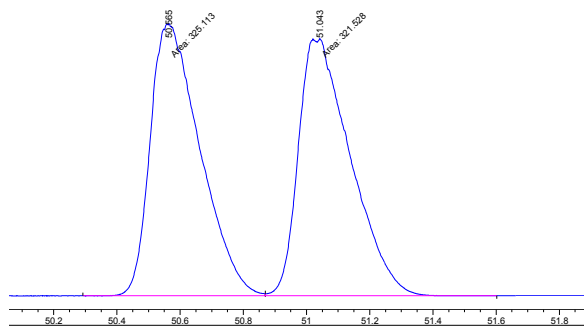

*Racemic Sample*

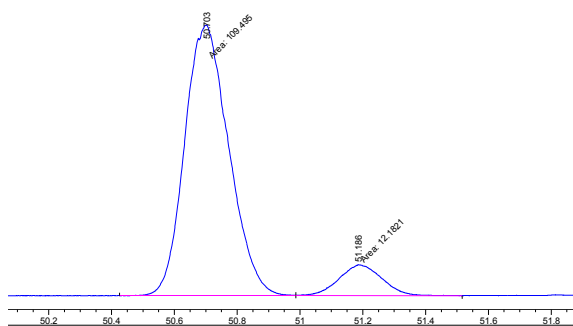

*Enantioenriched Sample*

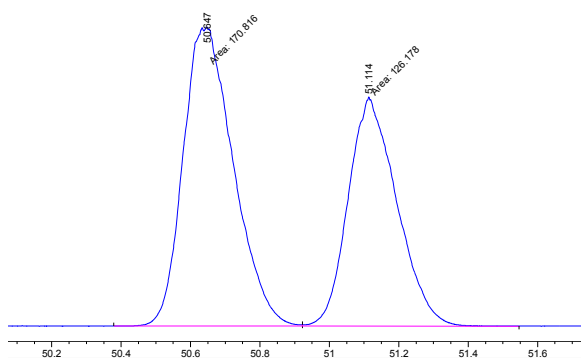

*co-injection of racemic and enantioenriched samples*

| Peak # | RetTime [min] | Type | Width [min] | Area [pA*s] | Height [pA] | Area %   |
|--------|---------------|------|-------------|-------------|-------------|----------|
| 1      | 50.703        | MF   | 0.1627      | 109.49494   | 11.21545    | 89.98819 |
| 2      | 51.186        | FM   | 0.1586      | 12.18208    | 1.28046     | 10.01181 |

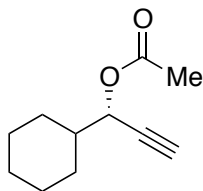

**(S)-1-cyclohexylprop-2-yn-1-yl acetate (Table 2, Entry 7 I).** The crude reaction mixture was purified on silica gel (pentane) to afford a clear, colorless oil.  $R_f = 0.51$  (pentane, stain in PMA).  $[\alpha]_D^{22} = -5.022$  ( $c = 1.76$ ,  $\text{CHCl}_3$ ). Spectral data is in accordance with the literature.<sup>2</sup>

#### **Analysis of Stereochemistry:**

Optical purity was determined by GLC analysis of the title compound as compared to racemic product. The absolute stereochemistry was assigned by analogy to (*S*)-oct-1-yn-3-yl acetate (Table 2, Entry 1 I).

Chiral GLC ( $\beta$ -dex, Supelco, 60 °C for 10 min, ramp 5 °C/min to 140 °C for 10 min, 20 psi) - analysis of title compound.

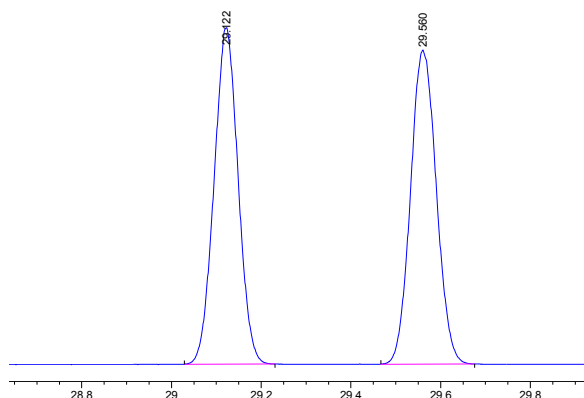

*Racemic Sample*

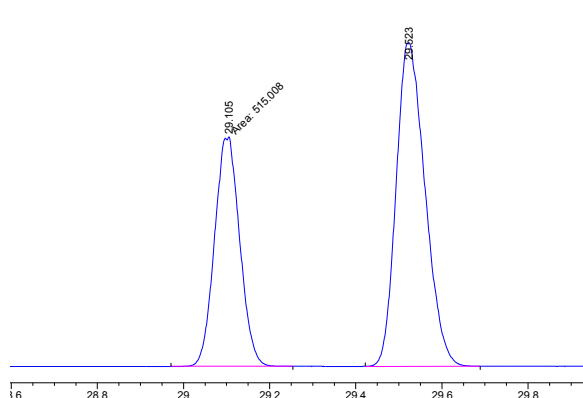

*Enantioenriched Sample*

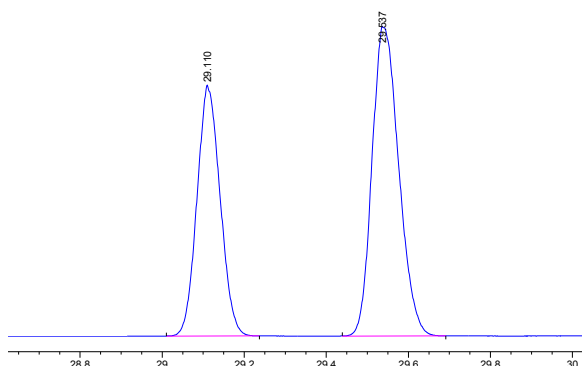

*co-injection of racemic and enantioenriched samples*

| Peak # | RetTime [min] | Type | Width [min] | Area [pA*s] | Height [pA] | Area %   |
|--------|---------------|------|-------------|-------------|-------------|----------|
| 1      | 29.105        | MM   | 0.0675      | 515.00781   | 127.15060   | 38.15054 |
| 2      | 29.523        | BB   | 0.0573      | 834.92798   | 179.27284   | 61.84946 |

**Kinetic resolution to give (*S*)-4-ethynylnon-1-ene (Table 2, Entry 8):** The representative procedure was followed with oct-1-yn-3-yl acetate with the following modification: (*S*)-**cat 1** (0.75 mol %) was used on a 0.2 mmol scale.

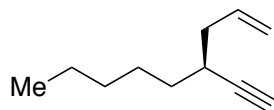

**(*S*)-4-ethynylnon-1-ene (Table 2, Entry 8 G).** The crude reaction mixture was purified on silica gel (pentane) to afford a clear, colorless oil.  $R_f = 0.71$  (pentane, stain in PMA). Spectral data is in accordance with literature.<sup>3</sup>

#### **Analysis of Stereochemistry:**

Optical purity was determined by GLC analysis of the title compound as compared to racemic product. The absolute stereochemistry was assigned by comparison to (*R*)-4-ethynylnon-1-ene (Table 2, Entry 1 G).

Chiral GLC (CD-BDM, Supelco, 40 °C for 30 min, ramp 0.25 °C/min to 50 °C for 10 min, 20 psi)  
 - analysis of title compound.

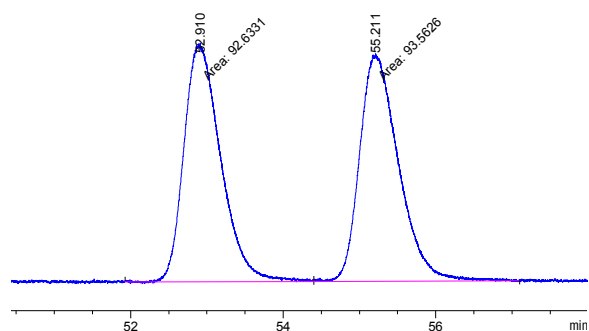

*Racemic Sample*

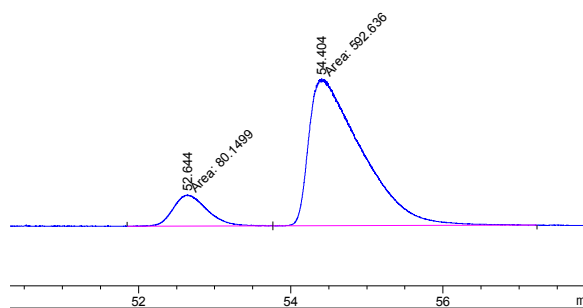

*Enantioenriched Sample*

| Peak # | RetTime [min] | Type | Width [min] | Area [pA*s] | Height [pA] | Area %   |
|--------|---------------|------|-------------|-------------|-------------|----------|
| 1      | 52.644        | MF   | 0.5080      | 80.14990    | 2.62966     | 11.91313 |
| 2      | 54.404        | FM   | 0.7952      | 592.63623   | 12.42084    | 88.08687 |

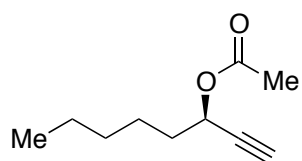

**(R)-oct-1-yn-3-yl acetate (Table 2, Entry 8 I).** The crude reaction mixture was purified on silica gel (10:1 pentane:diethyl ether) to afford a clear, colorless oil.  $R_f = 0.60$  (10:1 pentane: diethyl ether, stain in PMA). Spectral data is in accordance with literature.<sup>11</sup>

#### **Analysis of Stereochemistry:**

Optical purity was determined by GLC analysis of the title compound as compared to racemic product. The absolute stereochemistry was assigned by comparison to (*S*)-oct-1-yn-3-yl acetate (Table 2, Entry 1 I).

Chiral GLC ( $\beta$ -dex, Supelco, 60 °C for 10 min, ramp 5 °C/min to 140 °C for 10 min, 20 psi) - analysis of title compound.

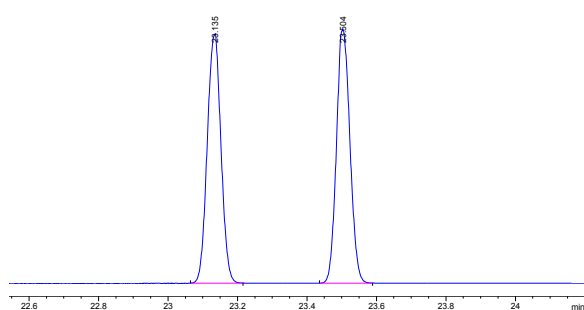

Racemic Sample

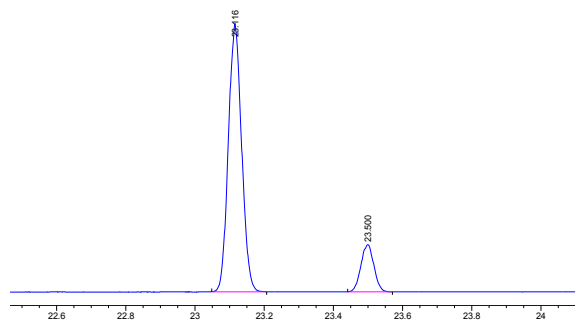

Enantioenriched Sample

| Peak # | RetTime [min] | Type | Width [min] | Area [pA*s] | Height [pA] | Area %   |
|--------|---------------|------|-------------|-------------|-------------|----------|
| 1      | 23.116        | BB   | 0.0358      | 157.85902   | 59.36190    | 85.29798 |
| 2      | 23.500        | BB   | 0.0345      | 27.20868    | 10.41043    | 14.70202 |

**Kinetic resolution to give (*R*)-hex-5-en-1-yn-3-ylbenzene (Table 2, Entry 9):** The representative procedure was followed with 1-phenylprop-2-yn-1-yl acetate with the following modification: the reaction was run for 2 hours at 0.5% catalyst loading on a 0.2 mmol scale.

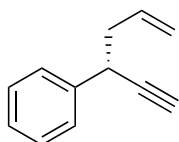

**(*R*)-hex-5-en-1-yn-3-ylbenzene (Table 2, Entry 9 G).** The crude reaction mixture was purified on silica gel (pentane) to afford a clear, colorless oil.  $R_f = 0.43$  (pentane, stain in PMA).  $[\alpha]^{22}_D = -15.235$  ( $c = 0.31$ ,  $\text{CHCl}_3$ ). Spectral data is in accordance with the literature.<sup>8</sup>

#### Analysis of Stereochemistry:

Optical purity was determined by GLC analysis of the title compound as compared to racemic product. The absolute stereochemistry was assigned as shown below.

<sup>8</sup> Zhan, Z.; Yo, J.; Liu, H.; Cui, Y.; Yang, R.; Yang, W.; Li, Y. *J. Org. Chem.* **2006**, *71*, 8298.

Chiral GLC ( $\beta$ -dex, Supelco, 60 °C for 10 min, ramp 3 °C/min to 140 °C for 10 min, 20 psi) - analysis of title compound.

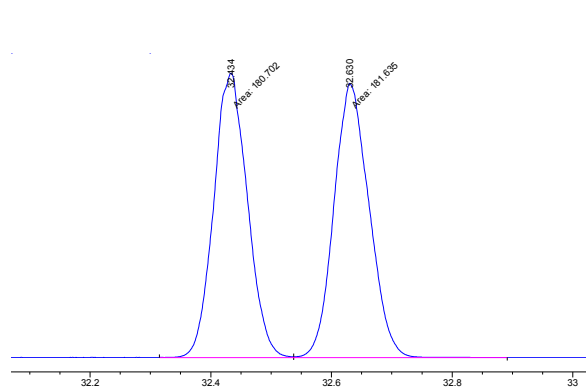

*Racemic Sample*

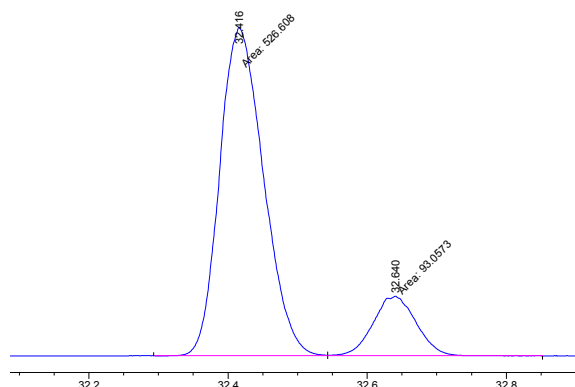

*Enantioenriched Sample*

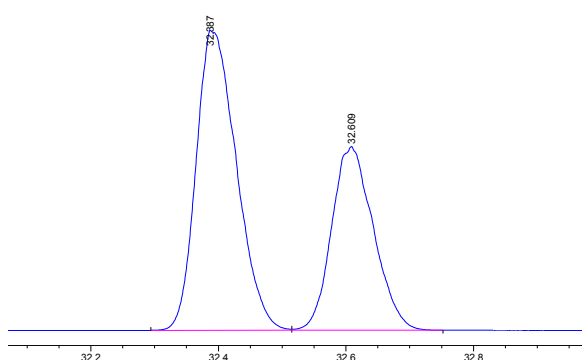

*co-injection of racemic and enantioenriched samples*

| Peak # | RetTime [min] | Type | Width [min] | Area [pA*s] | Height [pA] | Area %   |
|--------|---------------|------|-------------|-------------|-------------|----------|
| 1      | 32.416        | MF   | 0.0727      | 526.60809   | 120.75000   | 84.98265 |
| 2      | 32.640        | FM   | 0.0711      | 93.05730    | 21.80412    | 15.01735 |

### **Proof of Absolute Stereochemistry:**

In order to determine the absolute stereochemistry, the title compound was compared by GLC analysis to authentic (*S*)-hex-5-en-1-yn-3-ylbenzene, prepared by the stereospecific enyne cross coupling as depicted below.<sup>3</sup>

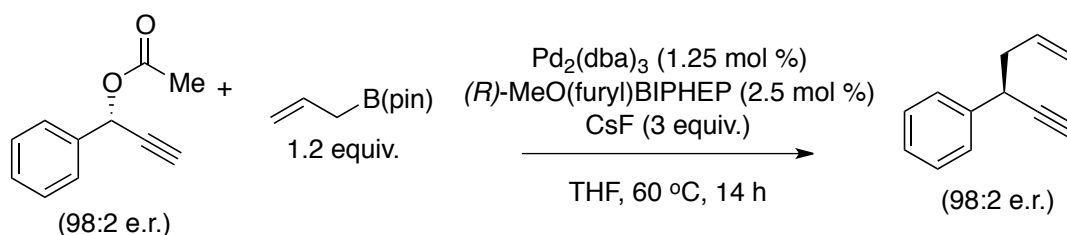

Chiral GLC ( $\beta$ -dex, Supelco, 60 °C for 10 min, ramp 3 °C/min to 140 °C for 10 min, 20 psi)-analysis of title compound.

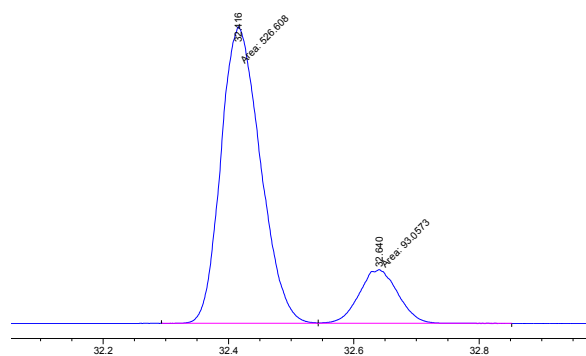

Title Compound

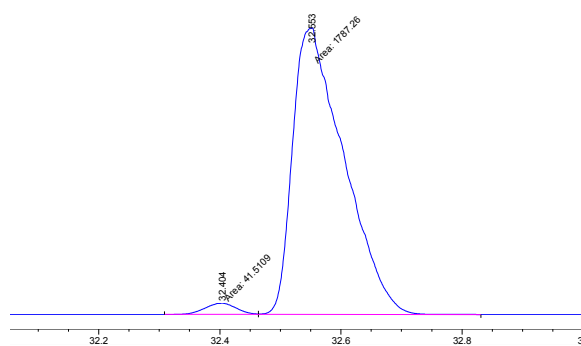

authentic (S)-hex-5-en-1-yn-3-ylbenzene

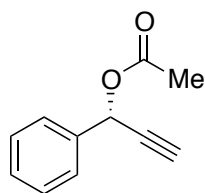

**(R)-1-phenylprop-2-yn-1-yl acetate (Table 2, Entry 9 I).** The crude reaction mixture was purified on silica gel (pentane) to afford a clear, colorless oil.  $R_f = 0.27$  (25:1 hexane: ethyl acetate, stain in PMA).  $[\alpha]^{22}_D = 2.176$  ( $c = 0.45$ ,  $\text{CHCl}_3$ ). Spectral data is in accordance with the literature.<sup>2</sup>

#### Analysis of Stereochemistry:

Optical purity was determined by GLC analysis of the title compound as compared to racemic product. The absolute stereochemistry was assigned as shown below.

Chiral GLC ( $\beta$ -dex, Supelco, 60 °C for 10 min, ramp 3 °C/min to 140 °C for 20 min, 20 psi) - analysis of title compound.

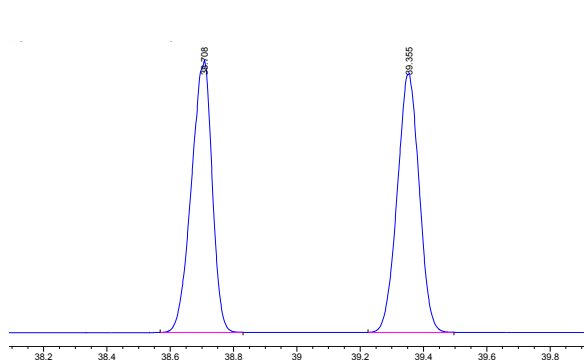

*Racemic Sample*

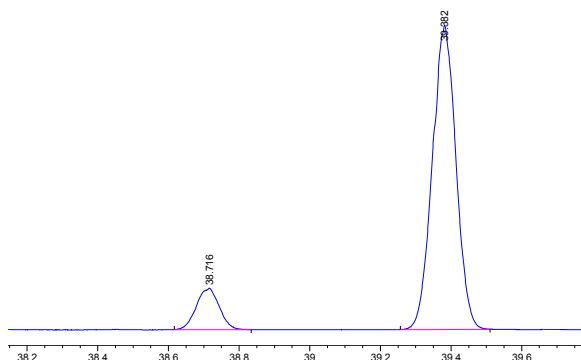

*Enantioenriched Sample*

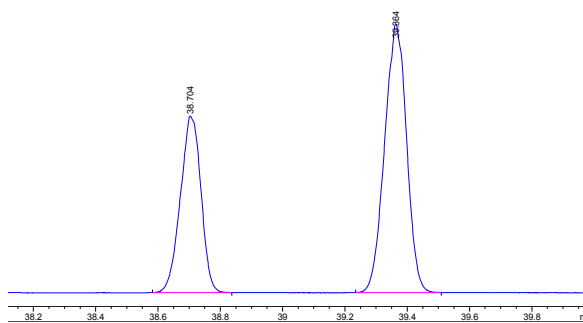

*co-injection of racemic and enantioenriched samples*

| Peak # | RetTime [min] | Type | Width [min] | Area [pA*s] | Height [pA] | Area %   |
|--------|---------------|------|-------------|-------------|-------------|----------|
| 1      | 38.716        | BB   | 0.0548      | 19.52114    | 4.33718     | 11.65692 |
| 2      | 39.382        | BB   | 0.0573      | 147.94279   | 31.80352    | 88.34308 |

**Proof of Absolute Stereochemistry:**

In order to determine the absolute stereochemistry, the optical rotation of the title compound  $[[\alpha]^{22}_D = 2.176$  ( $c = 0.45$ ,  $\text{CHCl}_3$ ), 88:11 e.r.] was compared to authentic (*R*)-1-phenylprop-2-yn-1-yl acetate prepared from commercially available (*R*)-1-phenylprop-2-yn-1-ol as shown below  $[[\alpha]^{22}_D = 4.852$  ( $c = 0.915$ ,  $\text{CHCl}_3$ ), 98:2 e.r.]

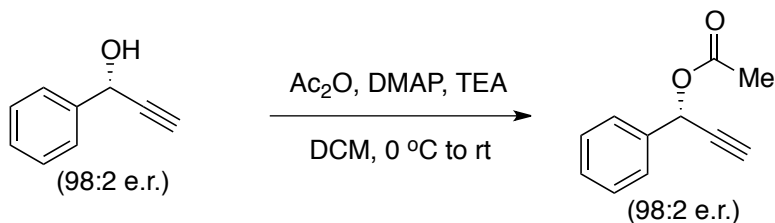



### Kinetic resolution to give (*R*)-1-(hex-5-en-1-yn-3-yl)-4-methylbenzene (Table 2, Entry 10):

The representative procedure was followed with 1-(*p*-tolyl)prop-2-yn-1-yl acetate with the following modification: the reaction was run for 2 hours at 0.5% catalyst loading on a 0.2 mmol scale.

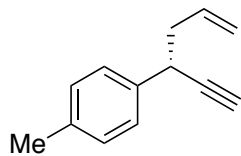

**(*R*)-1-(hex-5-en-1-yn-3-yl)-4-methylbenzene (Table 2, Entry 10 G).** <sup>1</sup>H NMR (500 MHz, CDCl<sub>3</sub>): δ 7.25 (2H, ddd, *J* = 8.0 Hz, 2.0 Hz, 2.0 Hz), 7.14 (2H, d, *J* = 8.0 Hz), 5.85 (1H, dddd (app ddt), *J* = 17.0 Hz, 10.0 Hz, 6.5 Hz, 6.5 Hz), 5.09 (1H, ddd, *J* = 1.5 Hz, 1.5 Hz, 1.5 Hz), 5.04 - 5.07 (1H, m), 3.69 (1H, ddd (app dt), *J* = 7.0 Hz, 7.0 Hz, 2.5 Hz), 2.50 (2H, dddd (app ddt), *J* = 6.5 Hz, 6.5 Hz, 2.5 Hz, 1.5 Hz), 2.33 (3H, s), 2.28 (1H, d, *J* = 2.5);

<sup>13</sup>C NMR (125 MHz, CDCl<sub>3</sub>): δ 137.8, 136.5, 135.3, 129.2, 129.2, 127.3, 127.3, 117.1, 85.6, 71.2, 42.4, 37.3, 21.1; IR (neat): 3299 (w), 3051(m), 3007 (m), 2923 (w), 2857 (m), 1513 (m), 1022 (m), 915 (m), 813 (m), 634 (s) cm<sup>-1</sup>; HRMS-(ESI+) for C<sub>13</sub>H<sub>15</sub> [M+H]<sup>+</sup>: calculated: 171.1174, found: 171.1179. [α]<sub>D</sub><sup>22</sup> = -59.989 (*c* = 0.05, CHCl<sub>3</sub>). The crude reaction was purified on silica gel (pentane) to afford a clear, colorless oil. R<sub>f</sub> = 0.23 (pentane; stain in PMA).

### Analysis of Stereochemistry:

Optical purity was determined by SFC analysis of the title compound as compared to racemic product. The absolute stereochemistry was assigned by analogy to (*R*)-hex-5-en-1-yn-3-ylbenzene (Table 2, Entry 9 G).

Chiral SFC (OJ-H, Chiralpak, 215 nm, 3.0 mL/min, 1% 1:1 *i*-PrOH:Hexanes, 100 bar, 35 °C) - analysis of title compound.

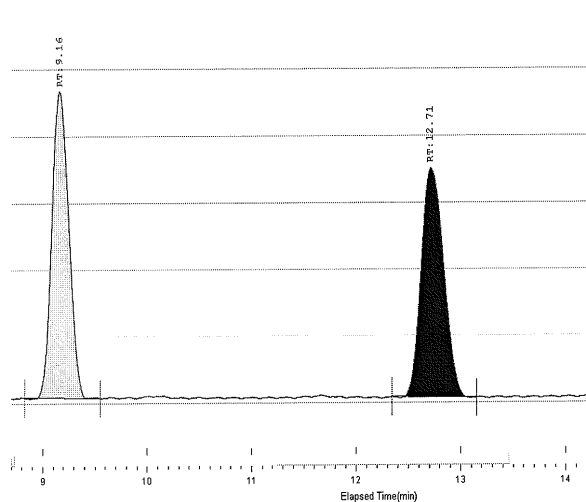

Racemic Sample

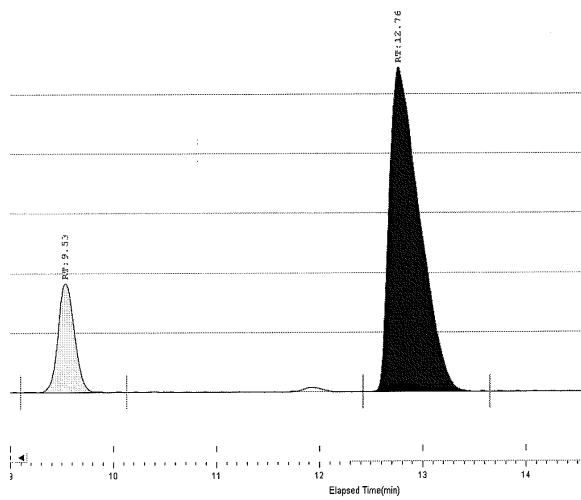

Enantioenriched Sample

| Peak No | % Area  | Area       | RT (min) |
|---------|---------|------------|----------|
| 1       | 15.3555 | 4031.9559  | 9.53     |
| 2       | 84.6445 | 22225.3857 | 12.76    |
| Total:  | 100     | 26257.3416 |          |

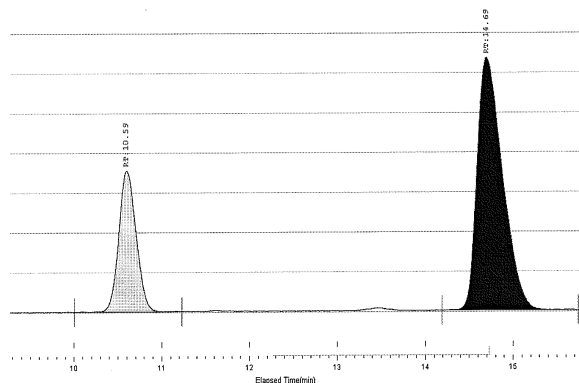

*co-injection of racemic and  
enantioenriched samples*

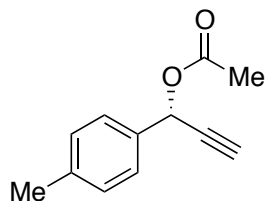

**(*R*)-1-(*p*-tolyl)prop-2-yn-1-yl acetate (Table 2, Entry 10 I).** The crude reaction mixture was purified on silica gel (10:1 pentane: diethyl ether) to afford a clear, colorless oil.  $R_f = 0.26$  (25:1 hexane: ethyl acetate; stain in PMA).  $[\alpha]^{22}_D = 26.177$  ( $c = 0.11$ ,  $\text{CHCl}_3$ ). Spectral data is in accordance with the literature.<sup>1</sup>

***Analysis of Stereochemistry:***

Optical purity was determined by SFC analysis of the title compound as compared to racemic product. The absolute stereochemistry was assigned by analogy to (*R*)-1-phenylprop-2-yn-1-yl acetate (Table 2, Entry 9 I).

Chiral SFC (OJ-H, Chiralpak, 215 nm, 3.0 mL/min, 3% i-PrOH, 100 bar, 35 °C) - analysis of title compound.

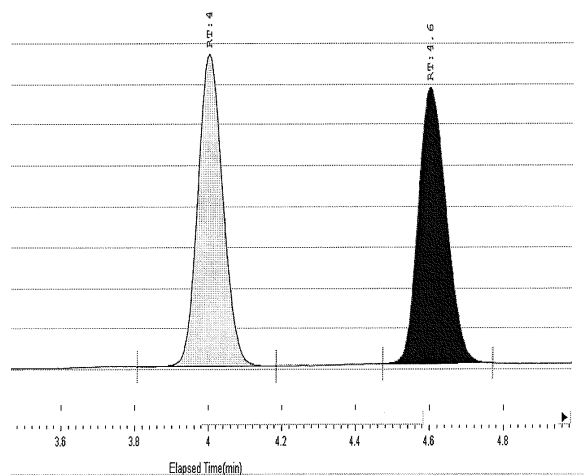

*Racemic Sample*

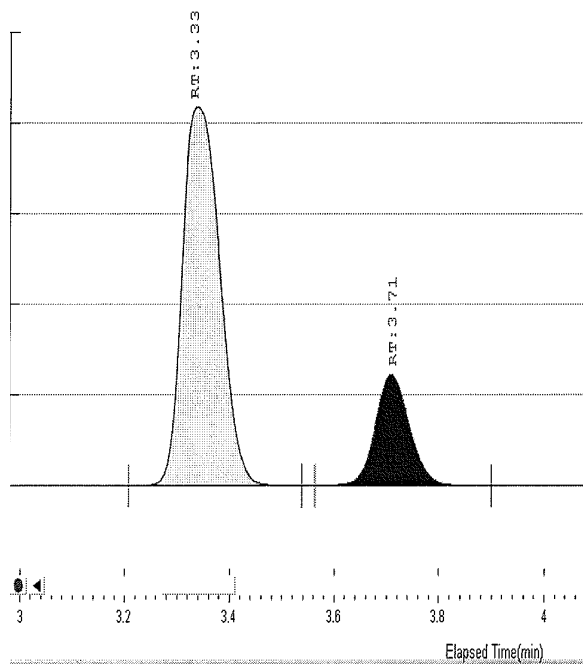

*Enantioenriched Sample*

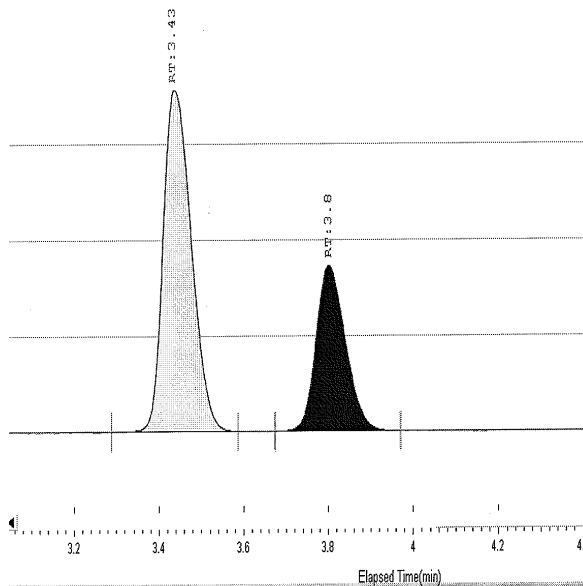

*co-injection of racemic and enantioenriched samples*

| Peak No | % Area  | Area       | RT (min) |
|---------|---------|------------|----------|
| 1       | 78.8757 | 10298.8407 | 3.33     |
| 2       | 21.1243 | 2758.2045  | 3.71     |
| Total:  | 100     | 13057.0452 |          |

**Kinetic resolution to give (*R*)-1-(hex-5-en-1-yn-3-yl)-4-methoxybenzene (Table 2, Entry 11):**  
 The representative procedure was followed with 1-(4-methoxyphenyl)prop-2-yn-1-yl acetate with the following modification: the reaction was run for 1 hour at 0.5% catalyst loading on a 0.2 mmol scale.

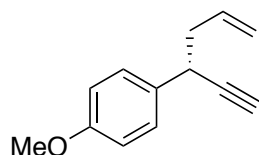

**(*R*)-1-(hex-5-en-1-yn-3-yl)-4-methoxybenzene (Table 2, Entry 11 G).**

The crude reaction mixture was purified on silica gel (10:1 pentane: diethyl ether) to afford a clear, colorless oil.  $R_f = 0.86$  (10:1 pentane: diethyl ether, stain in  $\text{KMnO}_4$ ).  $[\alpha]^{22}_D = 13.916$  ( $c = 0.73$ ,  $\text{CHCl}_3$ ). Spectral data is in accordance with the literature.<sup>3</sup>

**Analysis of Stereochemistry:**

Optical purity was determined by GLC analysis of the title compound as compared to racemic product. The absolute stereochemistry was assigned by analogy to (*R*)-hex-5-en-1-yn-3-ylbenzene (Table 2, Entry 9 G).

Chiral GLC ( $\beta$ -dex, Supelco, 60 °C for 10 min, ramp 1 °C/min to 160 °C for 20 min, 20 psi) - analysis of title compound.

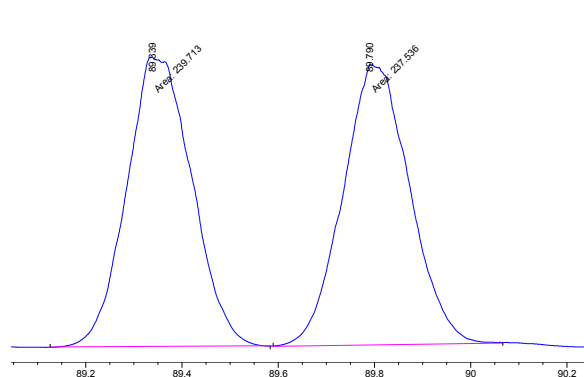

*Racemic Sample*

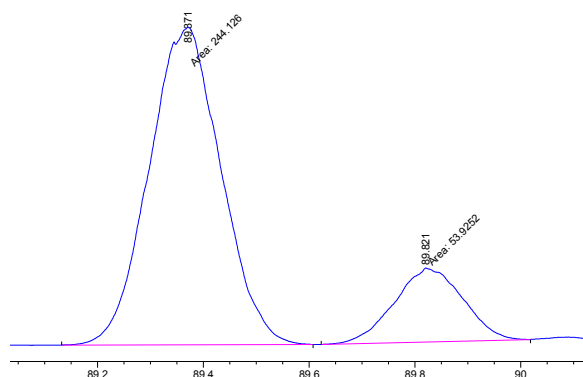

*Enantioenriched Sample*

| Peak # | RetTime [min] | Type | Width [min] | Area [pA*s] | Height [pA] | Area %   |
|--------|---------------|------|-------------|-------------|-------------|----------|
| 1      | 89.371        | MM   | 0.1571      | 244.12610   | 25.89414    | 81.90742 |
| 2      | 89.821        | MM   | 0.1491      | 53.92517    | 6.02781     | 18.09258 |

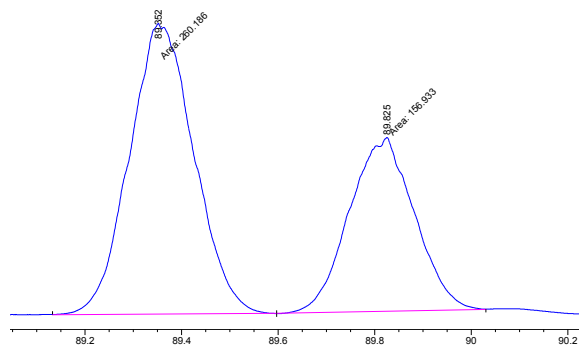

*co-injection of racemic and enantioenriched samples*

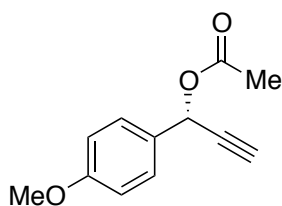

**(R)-1-(4-methoxyphenyl)prop-2-yn-1-yl acetate (Table 2, Entry 11 I).**

The crude reaction mixture was purified on silica gel (10:1 pentane: diethyl ether) to afford a clear, colorless oil.  $R_f = 0.39$  (10:1 pentane: diethyl ether, stain in  $\text{KMNO}_4$ ).  $[\alpha]_D^{22} = 20.301$  ( $c = 0.92$ ,  $\text{CHCl}_3$ ). Spectral data is in accordance with the literature.<sup>3</sup>

**Analysis of Stereochemistry:**

Optical purity was determined by GLC analysis of the title compound as compared to racemic product. The absolute stereochemistry was assigned by analogy to (*R*)-1-phenylprop-2-yn-1-yl acetate (Table 2, Entry 9 I).

Chiral GLC ( $\beta$ -dex, Supelco, 40 °C for 10 min, ramp 2.5 °C/min to 160 °C for 20 min, 20 psi) - analysis of title compound.

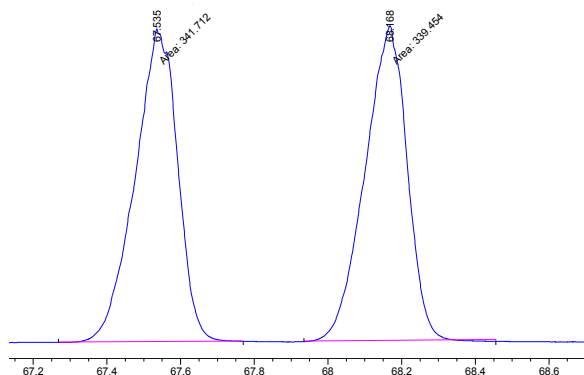

Racemic Sample

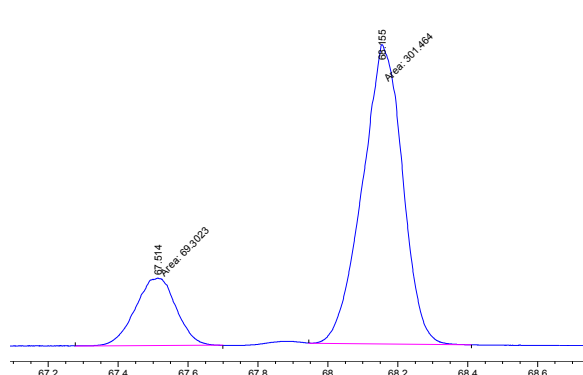

Enantioenriched Sample

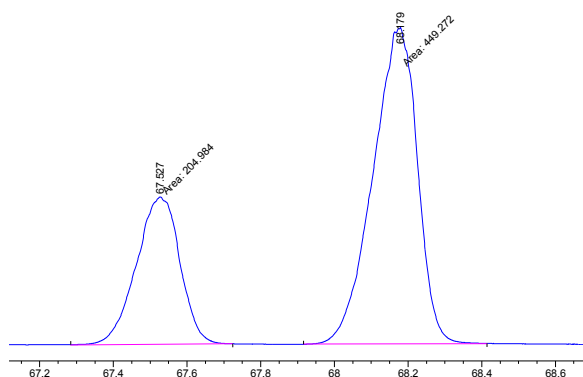

co-injection of racemic and enantioenriched samples

| Peak # | RetTime [min] | Type | Width [min] | Area [pA*s] | Height [pA] | Area %   |
|--------|---------------|------|-------------|-------------|-------------|----------|
| 1      | 67.514        | MM   | 0.1357      | 69.30232    | 8.51125     | 18.69166 |
| 2      | 68.155        | MM   | 0.1332      | 301.46375   | 37.73237    | 81.30834 |

**Kinetic resolution to give (*R*)-1-chloro-4-(hex-5-en-1-yn-3-yl)benzene (Table 2, Entry 12):** The representative procedure was followed with 1-(4-chlorophenyl)prop-2-yn-1-yl acetate with the following modification: the reaction was run for 2 hours at 0.5% catalyst loading on a 0.2 mmol scale.

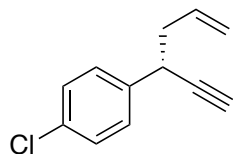

**(*R*)-1-chloro-4-(hex-5-en-1-yn-3-yl)benzene (Table 2, Entry 12 G).** The crude reaction mixture was purified on silica gel (pentane) to afford a clear, colorless oil.  $R_f = 0.37$  (pentane, stain in PMA).  $[\alpha]_D^{22} = -5.646$  ( $c = 0.60$ ,  $\text{CHCl}_3$ ). Spectral data is in accordance with the literature.<sup>3</sup>

### **Analysis of Stereochemistry:**

Optical purity was determined by GLC analysis of the title compound as compared to racemic product. The absolute stereochemistry was assigned by analogy to (*R*)-hex-5-en-1-yn-3-ylbenzene (Table 2, Entry 9 G).

*Chiral GLC ( $\beta$ -dex, Supelco, 60 °C for 10 min, ramp 2 °C/min to 140 °C for 10 min, 20 psi) - analysis of title compound.*

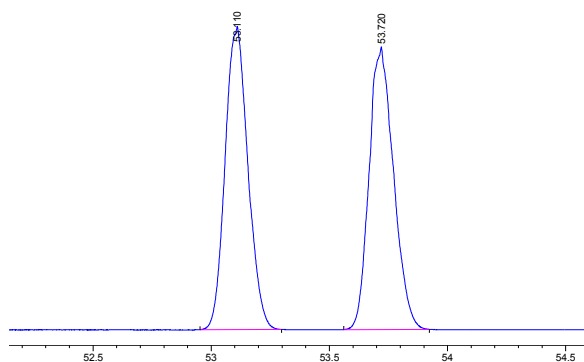

*Racemic Sample*

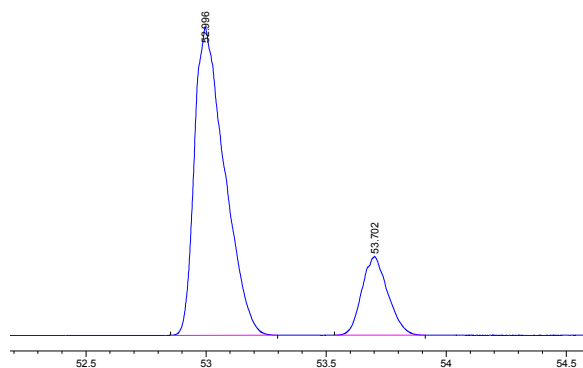

*Enantioenriched Sample*

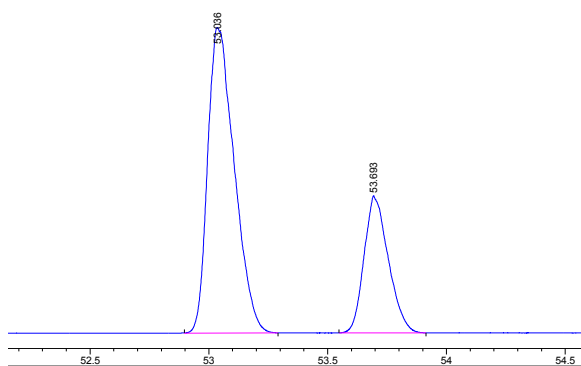

*co-injection of racemic and enantioenriched samples*

| Peak # | RetTime [min] | Type | Width [min] | Area [pA*s] | Height [pA] | Area %   |
|--------|---------------|------|-------------|-------------|-------------|----------|
| 1      | 52.996        | BB   | 0.1041      | 1385.26355  | 159.45381   | 81.93271 |
| 2      | 53.702        | BB   | 0.0887      | 305.46964   | 40.77204    | 18.06729 |

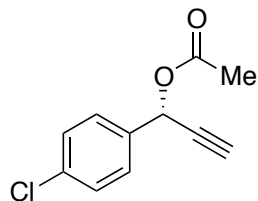

**(R)-1-(4-chlorophenyl)prop-2-yn-1-yl acetate (Table 2, Entry 12 I).** The crude reaction mixture was purified on silica gel (10:1 pentane:diethyl ether) to afford a clear, colorless oil.  $R_f = 0.32$  (10:1 hexane: ethyl acetate, stain in PMA).  $[\alpha]_D^{22} = 9.834$  ( $c = 1.22$ ,  $\text{CHCl}_3$ ). Spectral data is in accordance with the literature.<sup>1</sup>

### Analysis of Stereochemistry:

Optical purity was determined by GLC analysis of the title compound as compared to racemic product. The absolute stereochemistry was assigned by analogy to (*R*)-1-phenylprop-2-yn-1-yl acetate (Table 2, Entry 9 I).

Chiral GLC ( $\beta$ -dex, Supelco, 100 °C for 10 min, ramp 3 °C/min to 160 °C for 10 min, 20 psi) - analysis of title compound.

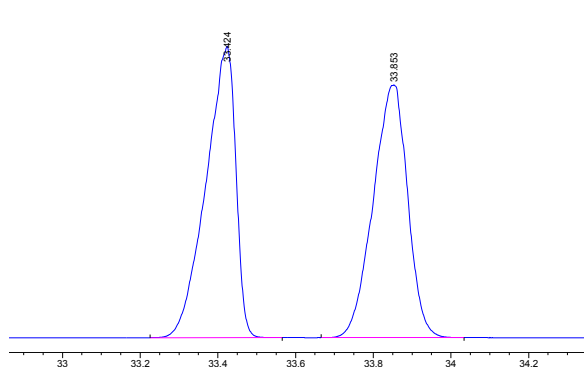

*Racemic Sample*

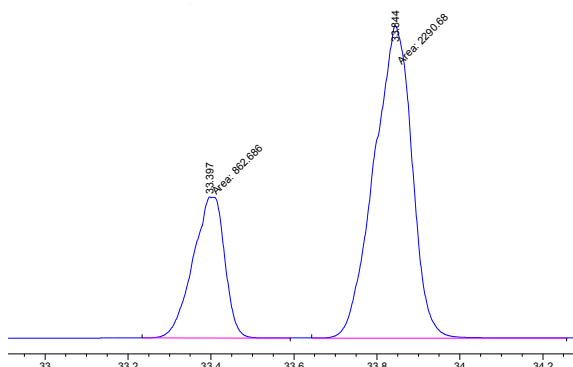

*Enantioenriched Sample*

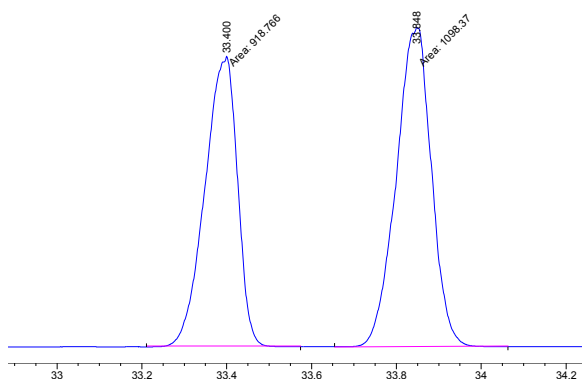

*co-injection of racemic and enantioenriched samples*

| Peak # | RetTime [min] | Type | Width [min] | Area [pA*s] | Height [pA] | Area %   |
|--------|---------------|------|-------------|-------------|-------------|----------|
| 1      | 33.397        | MM   | 0.0885      | 862.68561   | 162.41209   | 27.35757 |
| 2      | 33.844        | MM   | 0.1061      | 2290.68481  | 359.74545   | 72.64243 |



**Kinetic resolution to give (*R*)-5-(hex-5-en-1-yn-3-yl)benzo[d][1,3]dioxole (Table 2, Entry 13):** The representative procedure was followed with 1-(benzo[d][1,3]dioxol-5-yl)prop-2-yn-1-yl acetate with the following modification: the reaction was run for 2 hours at 0.5% catalyst loading on a 0.2 mmol scale.

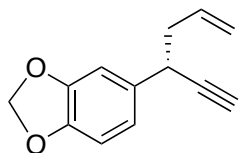

**(*R*)-5-(hex-5-en-1-yn-3-yl)benzo[d][1,3]dioxole (Table 2, Entry 13 G).**

<sup>1</sup>H NMR (500 MHz, CDCl<sub>3</sub>): δ 6.87 (1H, d, *J* = 2.0 Hz), 6.80 (1H, dd, *J* = 8.0 Hz, 2.0 Hz), 6.75 (1H, d, *J* = 8.0 Hz), 5.94 (2H, dd, *J* = 2.0 Hz, 2.0 Hz), 5.83 (1H, dddd (app ddt), *J* = 17.0 Hz, 10.5 Hz, 7.0 Hz, 7.0 Hz), 5.07-5.09 (1H, m), 5.04-5.06 (1H, m), 3.32 (1H, ddd (app dt), *J* = 7.0 Hz, 7.0 Hz, 2.5 Hz), 2.46-4.50 (2H, m), 2.94 (1H, d, *J* = 2.5 Hz); <sup>13</sup>C NMR (125 MHz, CDCl<sub>3</sub>): δ 147.7, 146.4, 135.0, 134.6, 120.5, 117.2, 108.1, 107.9, 101.0, 85.4, 71.3, 42.5, 37.4; IR (neat): 3293 (m), 3077 (w), 2979 (w), 2895 (m), 1485 (m), 2439 (s), 1245 (s), 918 (m), 634 (s) cm<sup>-1</sup>; HRMS-(ESI+) for C<sub>13</sub>H<sub>13</sub>O<sub>2</sub> [M+H]: calculated: 200.0837, found: 200.0837. [α]<sub>D</sub><sup>22</sup> = 28.318 (*c* = 0.37, CHCl<sub>3</sub>). The crude reaction was purified on silica gel (60:1 pentane:diethyl ether) to afford a clear, colorless oil. R<sub>f</sub> = 0.10 (pentane; stain in PMA).

**Analysis of Stereochemistry:**

Optical purity was determined by SFC analysis of the title compound as compared to racemic product. The absolute stereochemistry was assigned by analogy to (*R*)-hex-5-en-1-yn-3-ylbenzene (Table 2, Entry 9 G).

*Chiral SFC (AD-H, Chiralpak, 215 nm, 3.0 mL/min, 3% i-PrOH, 100 bar, 35 °C) - analysis of title compound.*

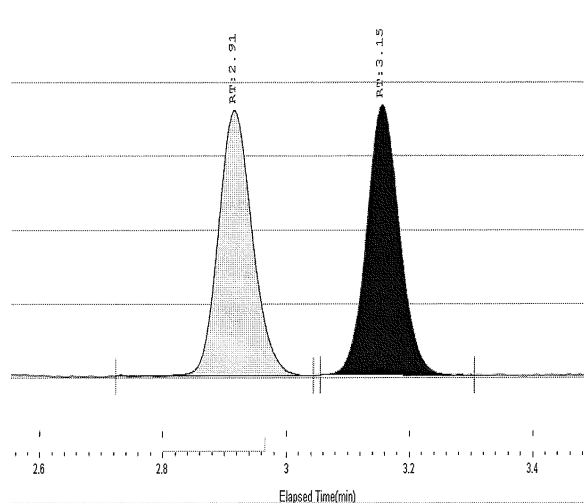

*Racemic Sample*

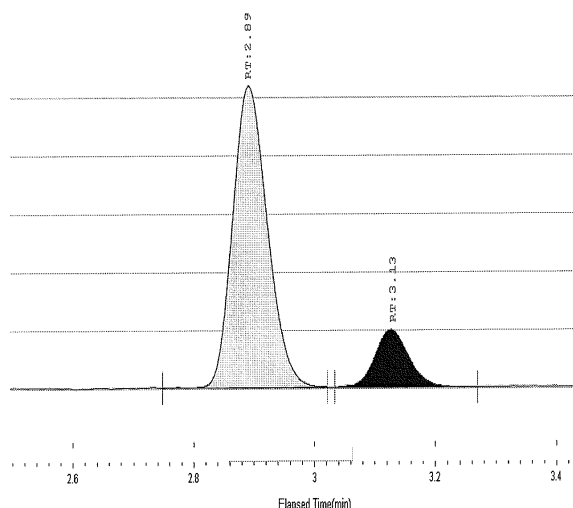

*Enantioenriched Sample*

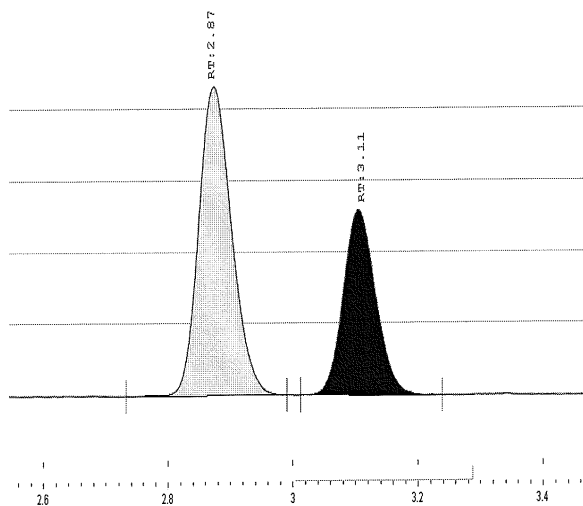

| Peak No | % Area | Area      | RT (min) |
|---------|--------|-----------|----------|
| 1       | 84.386 | 1026.7635 | 2.89     |
| 2       | 15.614 | 189.9822  | 3.13     |
| Total:  | 100    | 1216.7457 |          |

*co-injection of racemic and enantioenriched samples*

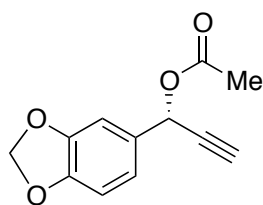

**(*R*)-1-(benzo[d][1,3]dioxol-5-yl)prop-2-yn-1-yl acetate (Table 2, Entry 13 I).** The crude reaction was purified on silica gel (10:1 pentane:diethyl ether) to afford a white solid.  $R_f = 0.14$  (20:1 hexane: ethyl acetate; stain in PMA).  $[\alpha]^{22}_D = 3.744$  ( $c = 0.38$ ,  $\text{CHCl}_3$ ). Spectral data is in accordance with the literature.<sup>3</sup>

#### **Analysis of Stereochemistry:**

Optical purity was determined by SFC analysis of the title compound as compared to racemic product. The absolute stereochemistry was assigned by analogy to (*R*)-1-phenylprop-2-yn-1-yl acetate (Table 2, Entry 9 I).

Chiral SFC (OJ-H, Chiralpak, 215 nm, 3.0 mL/min, 3% i-PrOH, 100 bar, 35 °C) - analysis of title compound.

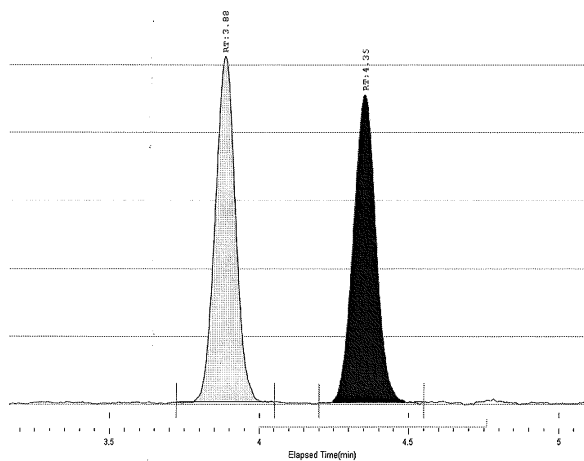

*Racemic Sample*

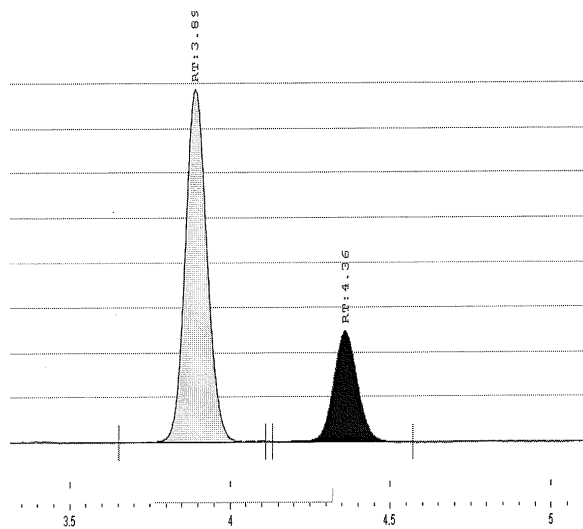

*Enantioenriched Sample*

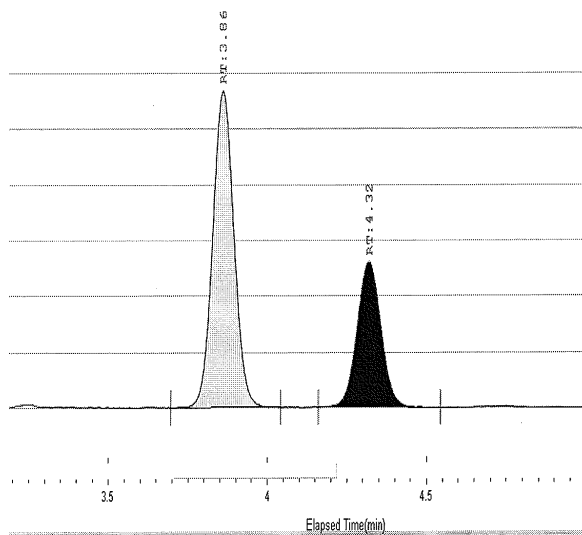

*co-injection of racemic and enantioenriched samples*

| Peak No | % Area  | Area      | RT (min) |
|---------|---------|-----------|----------|
| 1       | 74.5721 | 1853.3292 | 3.89     |
| 2       | 25.4279 | 631.9564  | 4.36     |
| Total:  | 100     | 2485.2856 |          |

**Kinetic resolution to give (*R*)-tert-butyl 3-(hex-5-en-1-yn-3-yl)-1H-indole-1-carboxylate (Table 2, Entry 14):** The representative procedure was followed with tert-butyl 3-(1-acetoxyprop-2-yn-1-yl)-1H-indole-1-carboxylate with the following modification: the reaction was run for 1 hour at 0.5% catalyst loading on a 0.2 mmol scale.

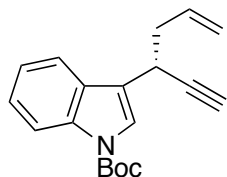

**(*R*)-tert-butyl 3-(hex-5-en-1-yn-3-yl)-1H-indole-1-carboxylate (Table 2, Entry 14 G).** The crude reaction mixture was purified on silica gel (10:1 pentane:diethyl ether) to afford a clear, colorless oil.  $R_f = 0.93$  (10:1 pentane:diethyl ether, stain in  $\text{KMnO}_4$ ).  $[\alpha]_D^{22} = -4.112$  ( $c = 0.73$ ,  $\text{CHCl}_3$ ). Spectral data is in accordance with the literature.<sup>3</sup>

### Analysis of Stereochemistry:

Optical purity was determined by SFC analysis of the title compound as compared to racemic product. The absolute stereochemistry was assigned by analogy to (*R*)-hex-5-en-1-yn-3-ylbenzene (Table 2, Entry 9 G).

*Chiral SFC (OJ-H, Chiralpak, 215 nm, 3.0 mL/min, 1% 1:1 i-PrOH:Hexanes, 100 bar, 35 °C) - analysis of title compound.*

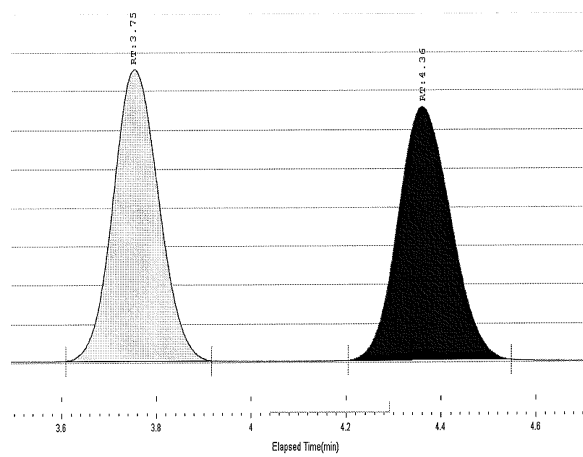

*Racemic Sample*

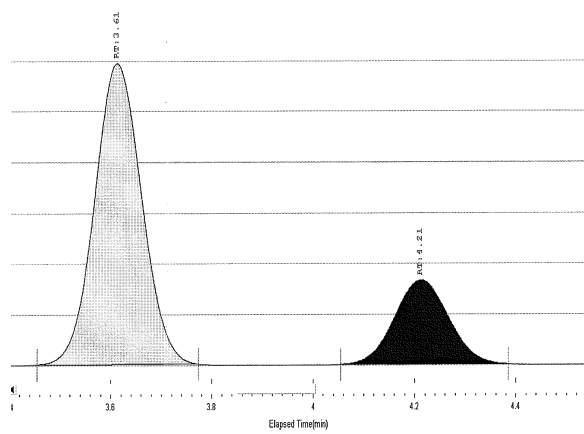

*Enantioenriched Sample*

| Peak Info |           |               |           |
|-----------|-----------|---------------|-----------|
| Peak Name | Number    | Concentration | Area %    |
| Peak1     | 1         | 0             | 75.6151   |
| Peak2     | 2         | 0             | 24.3849   |
| RT (min)  | St. (min) | End (min)     | Height    |
| 3.61      | 3.4547    | 3.7714        | 1187.8859 |
| 4.21      | 4.0547    | 4.383         | 332.7256  |

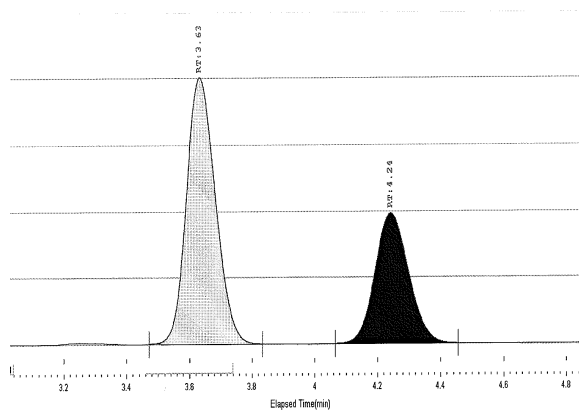

*co-injection of racemic and  
enantioenriched samples*

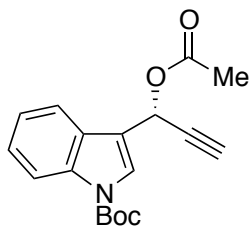

**(*R*)-tert-butyl 3-(1-acetoxyprop-2-yn-1-yl)-1H-indole-1-carboxylate (Table 2, Entry 14 I).** The crude reaction mixture was purified on silica gel (10:1 pentane:diethyl ether) to afford a clear, colorless oil.  $R_f = 0.35$  (10:1 pentane:diethyl ether, stain in  $\text{KMnO}_4$ ).  $[\alpha]_D^{25} = -2.350$  ( $c = 1.15$ ,  $\text{CHCl}_3$ ). Spectral data is in accordance with the literature.<sup>3</sup>

***Analysis of Stereochemistry:***

Optical purity was determined by SFC analysis of the title compound as compared to racemic product. The absolute stereochemistry was assigned by analogy to (*R*)-1-phenylprop-2-yn-1-yl acetate (Table 2, Entry 9 I).

Chiral SFC (OJ-H, Chiralpak, 215 nm, 3.0 mL/min, 1% 1:1 i-PrOH:Hexanes, 100 bar, 35 °C) - analysis of title compound.

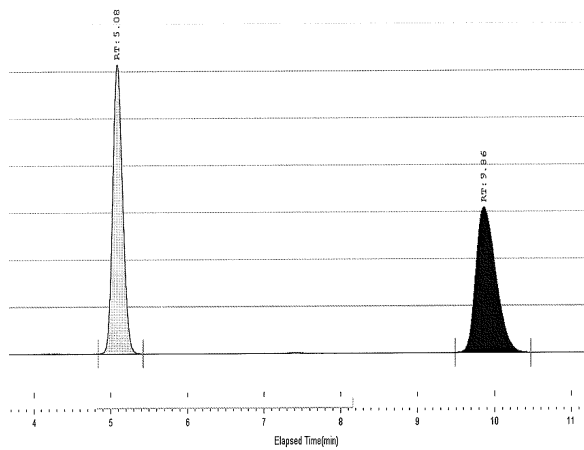

*Racemic Sample*

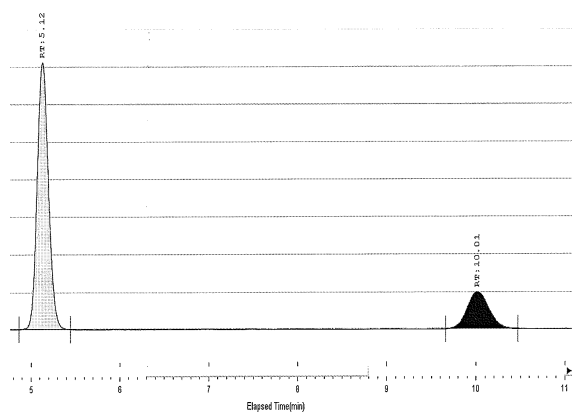

*Enantioenriched Sample*

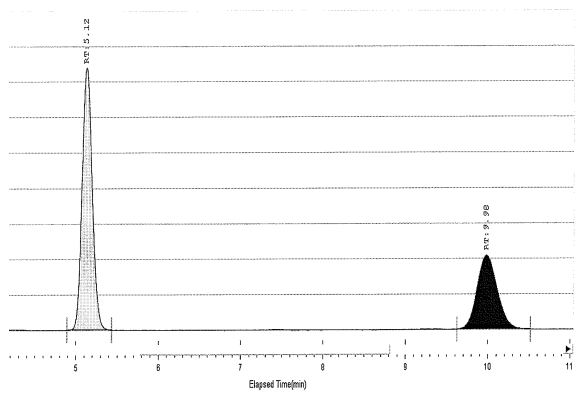

*co-injection of racemic and enantioenriched samples*

**Peak Info**

| Peak No | % Area  | Area      | RT (min) |
|---------|---------|-----------|----------|
| 1       | 79.0279 | 6306.2126 | 5.12     |
| 2       | 20.9721 | 1673.5195 | 10.01    |
| Total:  | 100     | 7979.7321 |          |

### Gram-Scale Resolution (Scheme 2, eq 3)

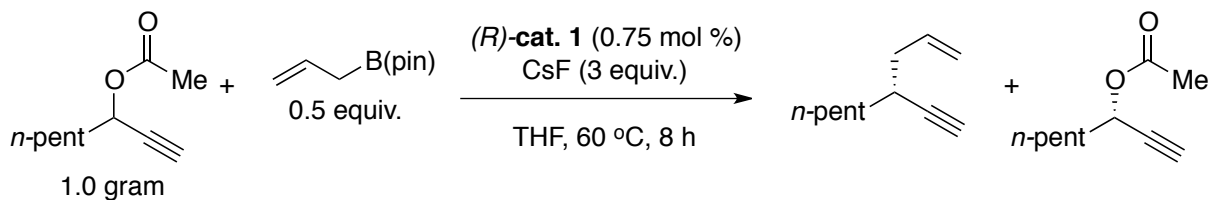

An oven-dried 100-mL airfree pressure vessel equipped with a magnetic stir bar was charged successively with [(*R*)-(+)-2,2'-Bis(di-2-furanylphosphino)-6,6'-dimethoxy-1,1'-biphenyl]palladium(II) dichloride (32.1 mg, 44.6  $\mu$ mol), THF (11.9 mL), oct-1-yn-3-yl acetate (1.0 g mg, 5.95 mmol), allylboronic acid pinacol ester (500 mg, 2.97 mmol), and cesium fluoride (2.71 g, 17.8 mmol) in a dry-box under argon atmosphere. The vessel was sealed, removed from the dry-box, and heated to 60 °C while allowing to stir for 8 h. After this time, the reaction mixture was diluted with diethyl ether, filtered through a plug of silica gel and concentrated *in vacuo*.

The crude reaction mixture was purified on a silica gel with a solvent gradient from 20:1 to 10:1 pentane:diethyl ether and the enyne product and recovered propargyl acetate were collected separately:

Enyne Product: clear colorless oil, 373.83 mg (93% yield based on 46% conversion) 89:11 e.r.

Recovered Acetate: Pale yellow oil, 391.26 mg (73% recovery based on 46% conversion) 82:18 e.r.; the *s* value was calculated to be 15.5 at the calculated 46% conversion.

### Preparation of 2-Methallylboronic acid Pinacol Ester

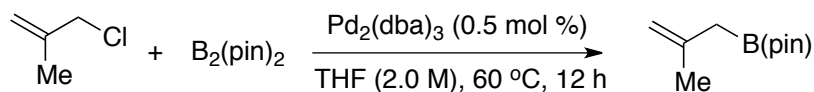

An oven-dried scintillation vial equipped with a magnetic stir bar was charged with Pd<sub>2</sub>(dba)<sub>3</sub> (13.7 mg, 0.015 mmol), bis(pinacolato)diboron (762.6 mg, 3.00 mmol), and tetrahydrofuran (1.5 mL) in a dry-box under argon atmosphere. The vial was capped and stirred for two minutes, then 3-chloro-2-methylpropane (271.7 mg, 3.00 mmol) was added. The vial was capped with a teflon cone-lined cap, sealed with electrical tape, removed from the dry-box, and heated to 60 °C and allowed to stir for 12 h. The reaction was then concentrated *in vacuo* and the crude reaction mixture was purified rapidly on oven-dried silica gel (50:1 pentane:diethyl ether) to afford a clear, colorless oil (341 mg, 63% yield). *R*<sub>f</sub> = 0.63 (50:1 pentane:diethyl ether, stain in KMnO<sub>4</sub>). Spectral data is in accordance with the literature.<sup>9</sup>

<sup>9</sup> Zhang, P.; Brozek, L. A.; Morken, J. P. *J. Am. Chem. Soc.* **2010**, *132*, 10686.

## Kinetic Resolution to Give (*R*)-4-ethynyl-2-methylnon-1-ene (Scheme 2, eq 4):

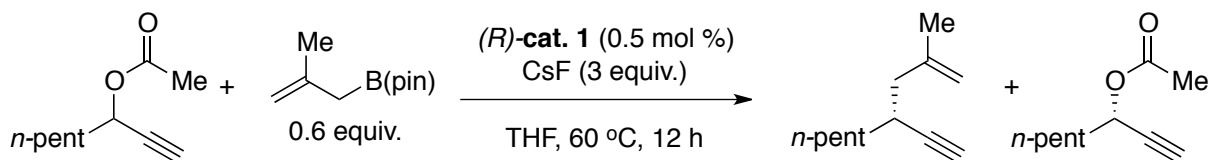

An oven-dried scintillation vial equipped with a magnetic stir bar was charged successively with [(*R*)-(+)-2,2'-Bis(di-2-furanylphosphino)-6,6'-dimethoxy-1,1'-biphenyl]palladium(II) dichloride (0.72 mg, 1.0  $\mu$ mol), THF (0.4 mL), oct-1-yn-3-yl acetate (33.6 mg, 0.20 mmol), 2-methylallylboronic acid pinacol ester (21.8 mg, 0.12 mmol), and cesium fluoride (91.9 mg, 0.6 mmol) in a dry-box under argon atmosphere. The vial was sealed, removed from the dry-box, and heated to 60 °C while allowing to stir for 12 h. After this time, the reaction mixture was diluted with diethyl ether, filtered through a plug of silica gel and concentrated *in vacuo*.

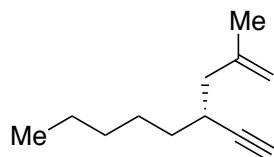

**(*R*)-4-ethynyl-2-methylnon-1-ene:** The crude reaction mixture was purified on silica gel (20:1 pentane:diethyl ether) to afford a clear, colorless oil.  $R_f = 0.95$  (20:1 pentane:diethyl ether, stain in  $KMnO_4$ ). Spectral data is in accordance with the literature.<sup>3</sup>

### Analysis of Stereochemistry:

Optical purity was determined by GLC analysis of the title compound as compared to racemic product. The absolute stereochemistry was assigned by analogy to (*R*)-4-ethynylnon-1-ene (Table 2, Entry 1 G). **Note:** The enantiomer ratios values presented in the report are an average of two runs.

Chiral GLC ( $\beta$ -dex, Supelco, 60 °C for 10 min, ramp 1 °C/min to 140 °C for 10 min, 20 psi) - analysis of title compound.

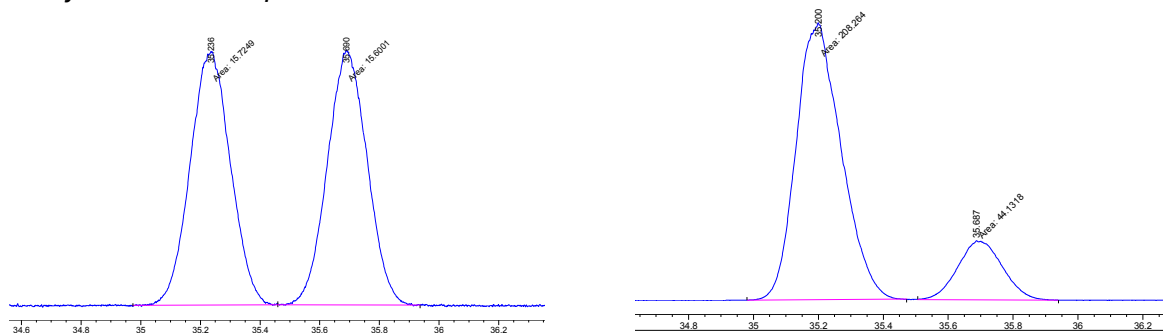



*Racemic Sample*

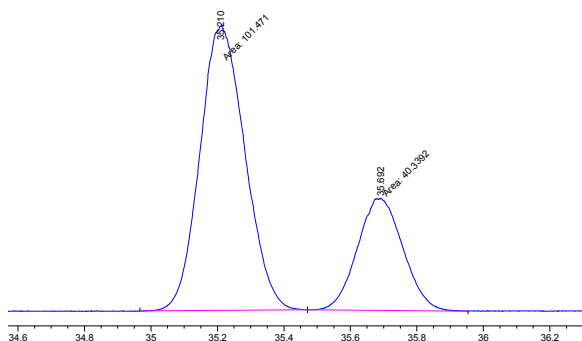

*Enantioenriched Sample*

| Peak # | RetTime [min] | Type | Width [min] | Area [pA*s] | Height [pA] | Area %   |
|--------|---------------|------|-------------|-------------|-------------|----------|
| 1      | 35.200        | MM   | 0.1606      | 208.26378   | 21.60966    | 82.51483 |
| 2      | 35.687        | MM   | 0.1594      | 44.13179    | 4.61521     | 17.48517 |

*co-injection of racemic and enantioenriched samples*

**Recovered (S)-oct-1-yn-3-yl acetate:**

*Chiral GLC ( $\beta$ -dex, Supelco, 60 °C for 10 min, ramp 1 °C/min to 140 °C for 10 min, 20 psi) - analysis of title compound.*

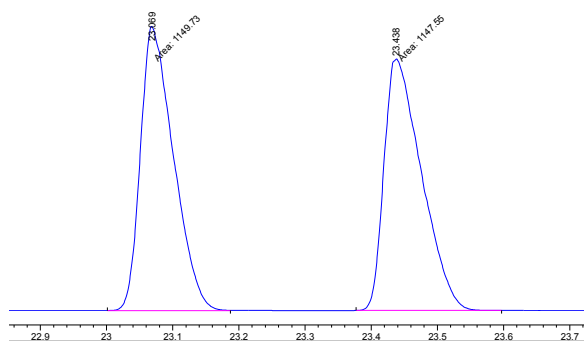

*Racemic Sample*

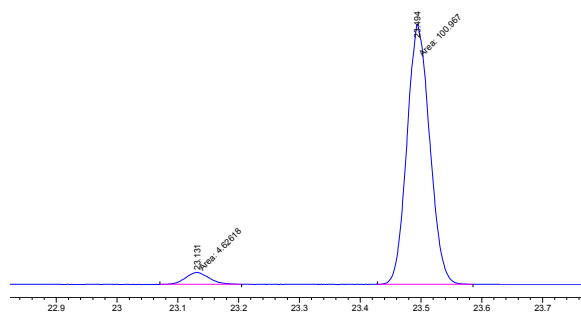

*Enantioenriched Sample*

| Peak # | RetTime [min] | Type | Width [min] | Area [pA*s] | Height [pA] | Area %   |
|--------|---------------|------|-------------|-------------|-------------|----------|
| 1      | 23.131        | MM   | 0.0441      | 4.62618     | 1.74884     | 4.38112  |
| 2      | 23.494        | MM   | 0.0435      | 100.96746   | 38.71632    | 95.61888 |

### Kinetic Isotope Labeling Study (Scheme 3)

The kinetic isotope effect was measured experimentally through a competition experiment between authentic oct-1-yn-3-yl acetate and its deuterated analogue, prepared from commercially available oct-1-yn-3-ol via the two step procedure as shown below:

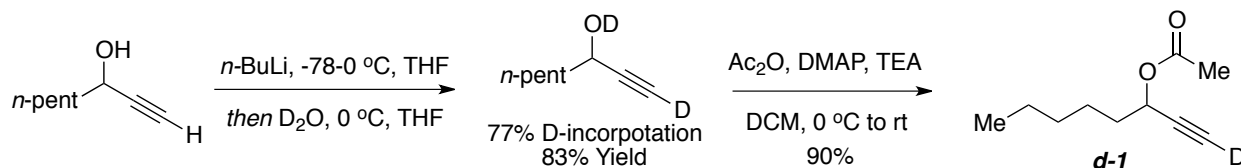

A flame-dried round-bottomed flask with a magnetic stir bar was charged with THF (50 mL) and oct-1-yn-3-ol (631 mg, 5.0 mmol) under nitrogen, and the solution was stirred and cooled to  $-78^{\circ}\text{C}$ . *n*-butyllithium (5.0 mL of a 2.5 M solution, 12.5 mmol) was added dropwise and the solution was stirred for 15 min at  $-78^{\circ}\text{C}$  and then slowly warmed to  $0^{\circ}\text{C}$ . A separate solution of  $\text{D}_2\text{O}$  (501 mg, 25.0 mmol) and THF (25 mL) was prepared under nitrogen in a separate flame-dried round-bottomed flask under nitrogen and sparged with a steady flow of nitrogen gas for 30 minutes. This solution was then added dropwise to the solution of alcohol and butyl lithium at  $0^{\circ}\text{C}$  under nitrogen, and the solution was stirred and slowly warmed to room temperature for three hours. The solution was recooled to  $0^{\circ}\text{C}$ , quenched with an aqueous saturated ammonium chloride solution, extracted three times with diethyl ether, dried with magnesium sulfate, filtered and concentrated *in vacuo*. The resulting crude mixture was purified on silica gel (2:1 pentane:diethyl ether) to give 531.5 mg of the desired labeled alcohol (83% yield, 77.3% D-incorporation by  $^1\text{H-NMR}$ ).  $R_f = 0.72$  (2:1 pentane:diethyl ether; stain in CAM). Representative procedure A was then followed to afford the desired labeled acetate (457 mg, 90% yield).  $R_f = 0.34$  (20:1 pentane:diethyl ether, stain in  $\text{KMNO}_4$ ).

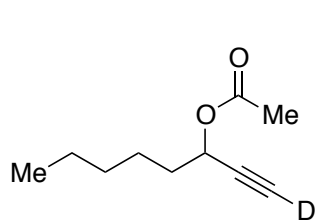

**d-oct-1-yn-3-yl acetate.**  $^1\text{H NMR}$  (500 MHz,  $\text{CDCl}_3$ ):  $\delta$  5.34 (1H, dd (app t),  $J = 6.5$  Hz, 6.5 Hz), 2.09 (3H, s), 1.74-1.79 (2H, m), 1.42-1.48 (2H, m), 1.29-1.35 (4H, m), 0.89 (3H, dd (app t),  $J = 7.0$  Hz, 7.0 Hz);  $^{13}\text{C NMR}$  (125 MHz,  $\text{CDCl}_3$ ):  $\delta$  169.9, 81.4, 73.3, 63.8, 34.5, 31.2, 24.5, 24.5, 21.0, 13.9; IR (neat): 3294 (w), 2956 (w), 2931 (m), 2863 (w), 1740 (s), 1371 (m), 1227 (s), 1020 (s), 962 (w), 892 (w)  $\text{cm}^{-1}$ ; HRMS-(ESI+) for  $\text{C}_{10}\text{H}_{16}\text{D}_1\text{O}_2$  [ $\text{M}+\text{H}$ ]: calculated: 170.12913, found: 170.12897.

In order to test for the kinetic isotope effect, Representative Procedure C was followed on a 0.2 mmol scale with a mixture of labeled and unlabeled oct-1-yn-3-yl acetate as shown below. The change in ratio of labeled and unlabeled acetate in the recovered enriched sample

was compared with the ratio in the starting material, and average rates for each were determined.

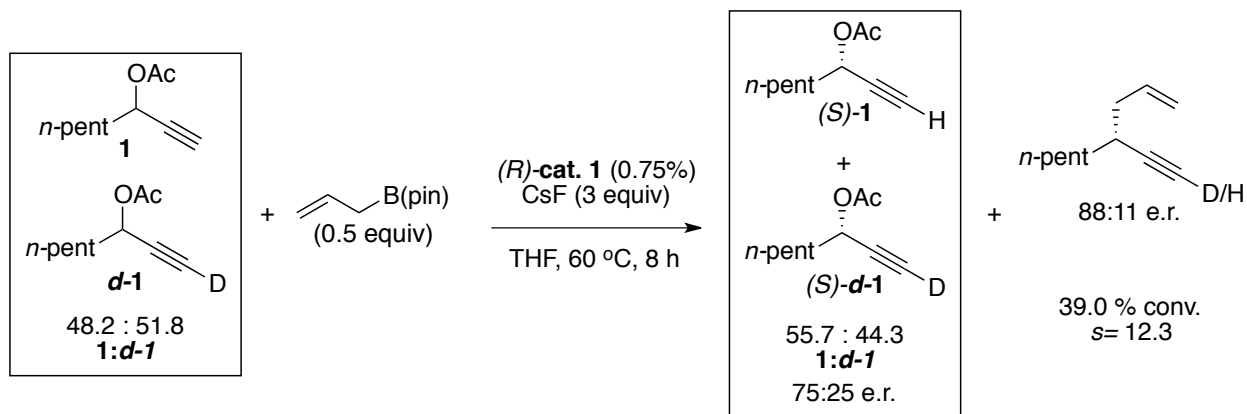

| Run | Total Conv. (%) | Conv. <b>1</b> (%) | Conv <b>d-1</b> (%) | Rate <b>1</b> [M]/min  | Rate <b>d-1</b> [M]/min | $k_H/k_D$ |
|-----|-----------------|--------------------|---------------------|------------------------|-------------------------|-----------|
| 1   | 39.0            | 16.6               | 22.4                | $0.864 \times 10^{-4}$ | $1.168 \times 10^{-4}$  | 0.74      |
| 2   | 50.1            | 20.6               | 29.6                | $1.073 \times 10^{-4}$ | $1.541 \times 10^{-4}$  | 0.70      |
| 3   | 52.9            | 21.8               | 32.1                | $1.135 \times 10^{-4}$ | $1.670 \times 10^{-4}$  | 0.68      |

### Representative Procedure D: Resolution of Propargyl Acetates with Tetramethylammonium Triacetoxyborohydride.

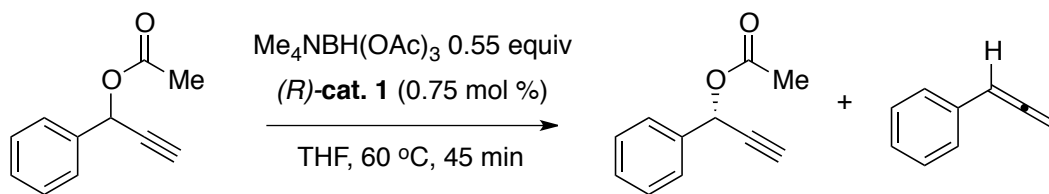

An oven-dried scintillation vial equipped with a magnetic stir bar was charged with [(*R*)-(+)-2,2'-Bis(di-2-furanylphosphino)-6,6'-dimethoxy-1,1'-biphenyl]palladium(II) dichloride (2.16 mg, 3.0  $\mu$ mol), tetramethylammonium triacetoxyborohydride (57.9 mg, 0.22 mmol), and THF (1.0 mL) in a dry-box under argon atmosphere. The vial was capped and allowed to stir for five minutes, over which time the solution turned a deep red color. 1-phenylprop-2-yn-1-yl acetate (69.6 mg, 0.40 mmol) was added and the vial was sealed, removed from the dry-box, and heated to 60  $^{\circ}$ C while allowing to stir for 45 minutes. After this time, the reaction mixture was diluted with diethyl ether, filtered through a plug of silica gel and concentrated *in vacuo*.

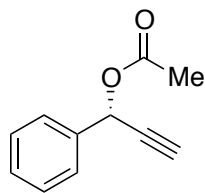

**(R)-1-phenylprop-2-yn-1-yl acetate (Table 3, Entry 1 I).** The crude reaction mixture was purified on silica gel (10:1 pentane:diethyl ether) to afford a clear, colorless oil (28.7 mg, 96% yield).  $R_f = 0.48$  (10:1 pentane:diethyl ether, stain in  $\text{KMNO}_4$ ).

### Analysis of Stereochemistry:

Optical purity was determined by GLC analysis of the title compound as compared to racemic product.

Chiral GLC ( $\beta$ -dex, Supelco, 60 °C for 10 min, ramp 5 °C/min to 140 °C for 15 min, 20 psi) - analysis of title compound.

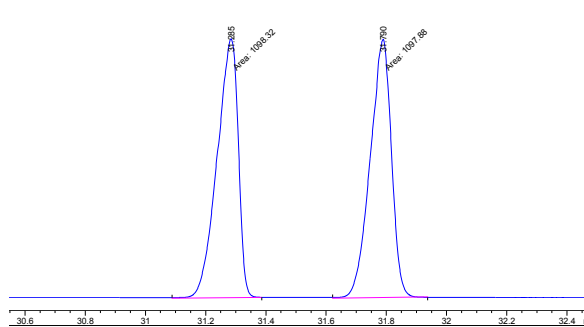

*Racemic Sample*

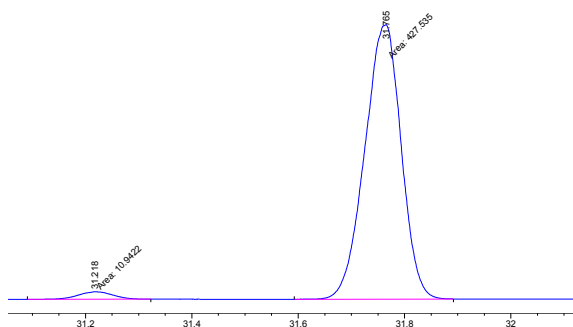

*Enantioenriched Sample*

| Peak # | RetTime [min] | Type | Width [min] | Area [pA*s] | Height [pA] | Area %   |
|--------|---------------|------|-------------|-------------|-------------|----------|
| 1      | 31.218        | MM   | 0.0741      | 10.94217    | 2.46253     | 2.49549  |
| 2      | 31.765        | MF   | 0.0792      | 427.53540   | 89.94408    | 97.50451 |

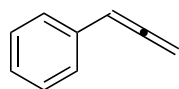

**propa-1,2-dien-1-ylbenzene (Table 3, Entry 1 L).** Clear, pale yellow oil.  $R_f = 0.88$  (10:1 pentane:diethyl ether, stain in  $\text{KMNO}_4$ ). Spectral data is in accordance with the literature.<sup>10</sup>

<sup>10</sup> F. Gagosz, B. Bolte, Y. Odabachian, *J. Am. Chem. Soc.* **2010**, *132*, 7294.

**(R)-1-(4-methoxyphenyl)prop-2-yn-1-yl acetate (Table 3, Entry 2):** The representative procedure was followed with 1-(4-methoxyphenyl)prop-2-yn-1-yl acetate with the following modification: the reaction was run for 1 hour with 0.5 equivalents of tetramethylammonium triacetoxymethylborohydride.

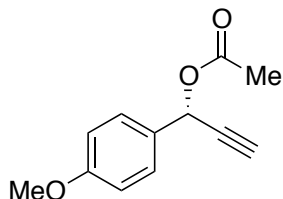

**(R)-1-(4-methoxyphenyl)prop-2-yn-1-yl acetate (Table 3, Entry 2 I).** The crude reaction mixture was purified on silica gel (10:1 pentane:diethyl ether) to afford a clear, colorless oil (40.8 mg, 90% yield).  $R_f = 0.33$  (10:1 pentane:diethyl ether, stain in  $KMnO_4$ ).

### Analysis of Stereochemistry:

Optical purity was determined by GLC analysis of the title compound as compared to racemic product.

Chiral GLC ( $\beta$ -dex, Supelco, 40 °C for 10 min, ramp 2.5 °C/min to 140 °C for 20 min, 20 psi) - analysis of title compound.

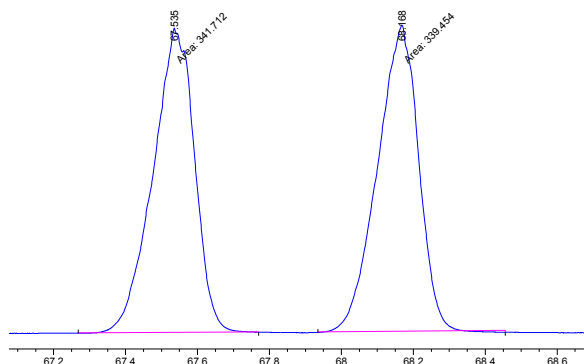

*Racemic Sample*

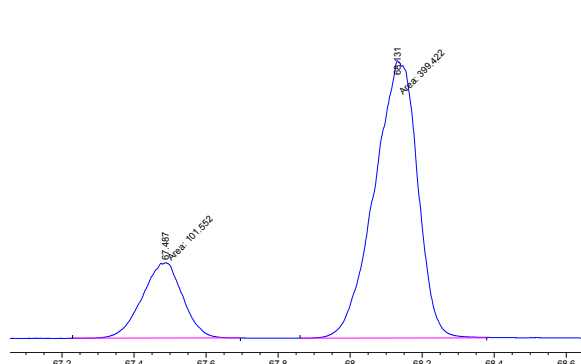

*Enantioenriched Sample*

| Peak # | RetTime [min] | Type | Width [min] | Area [pA*s] | Height [pA] | Area %   |
|--------|---------------|------|-------------|-------------|-------------|----------|
| 1      | 67.487        | MM   | 0.1302      | 101.55161   | 13.00158    | 20.27083 |
| 2      | 68.131        | MF   | 0.1390      | 399.42249   | 47.89069    | 79.72917 |

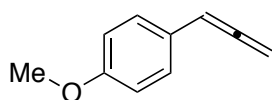

**1-methoxy-4-(propa-1,2-dien-1-yl)benzene (Table 3, Entry 2 L).** Clear, pale yellow oil.  $R_f = 0.85$  (10:1 pentane:diethyl ether, stain in  $KMnO_4$ ). Spectral data is in accordance with the literature.<sup>10</sup>

**Kinetic resolution to give (S)-oct-1-yn-3-yl acetate (Table 3, Entry 3):** The representative procedure was followed with oct-1-yn-3-yl acetate with the following modification: the reaction was run for 4.5 hours at with 0.6 equivalents of tetramethylammonium triacetoxyborohydride.

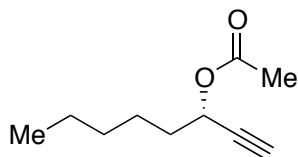

**(S)-oct-1-yn-3-yl acetate (Table 2, Entry 3 I).** The crude reaction mixture was purified on silica gel (20:1 pentane:diethyl ether) to afford a clear, colorless oil (19.7 mg, 70% yield).  $R_f = 0.31$  (20:1 pentane:diethyl ether, stain in  $KMnO_4$ ).

### Analysis of Stereochemistry:

Optical purity was determined by GLC analysis of the title compound as compared to racemic product.

Chiral GLC ( $\beta$ -dex, Supelco, 60 °C for 10 min, ramp 5 °C/min to 140 °C for 10 min, 20 psi) - analysis of title compound.

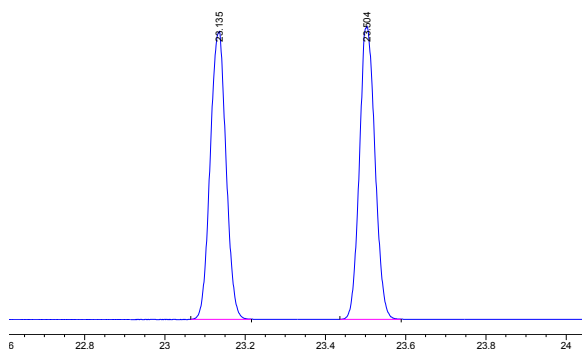

*Racemic Sample*

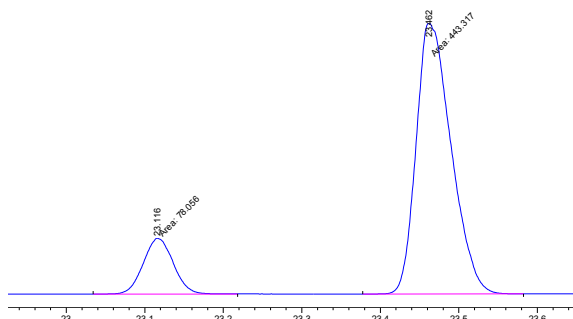

*Enantioenriched Sample*

| Peak # | RetTime [min] | Type | Width [min] | Area [pA*s] | Height [pA] | Area %   |
|--------|---------------|------|-------------|-------------|-------------|----------|
| 1      | 23.116        | MM   | 0.0442      | 78.05604    | 29.44047    | 14.97124 |
| 2      | 23.462        | MF   | 0.0517      | 443.31720   | 143.00038   | 85.02876 |

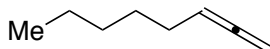

**octa-1,2-diene (Table 3, Entry 3 L).** Clear, pale yellow oil.  $R_f = 0.94$  (20:1 pentane:diethyl ether, stain in  $KMnO_4$ ). Spectral data is in accordance with the literature.<sup>10</sup>

**Kinetic resolution to give (S)-1-cyclohexylprop-2-yn-1-yl acetate (Table 3, Entry 4):** The representative procedure was followed with 1-cyclohexylprop-2-yn-1-yl acetate with the following modification: the reaction was run for 6.5 hours at 1.0% catalyst loading with 0.75 equivalents of the tetramethylammonium triacetoxyborohydride.

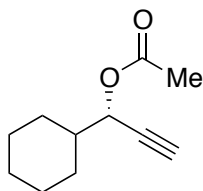

**(S)-1-cyclohexylprop-2-yn-1-yl acetate (Table 3, Entry 4 I).** The crude reaction mixture was purified on silica gel (20:1 pentane:diethyl ether) to afford a clear, colorless oil (28.5 mg, 88% yield).  $R_f = 0.38$  (20:1 pentane:diethyl ether, stain in  $KMnO_4$ ).

### Analysis of Stereochemistry:

Optical purity was determined by GLC analysis of the title compound as compared to racemic product.

Chiral GLC ( $\beta$ -dex, Supelco, 60 °C for 10 min, ramp 5 °C/min to 140 °C for 10 min, 20 psi) - analysis of title compound.

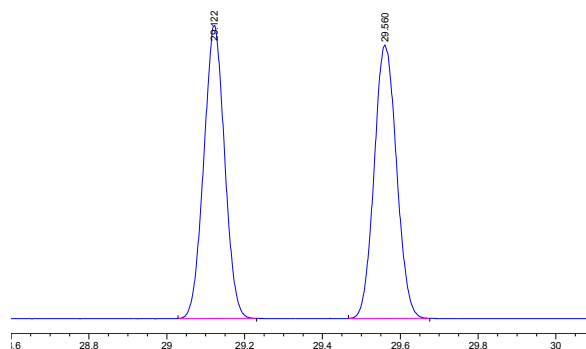

Racemic Sample

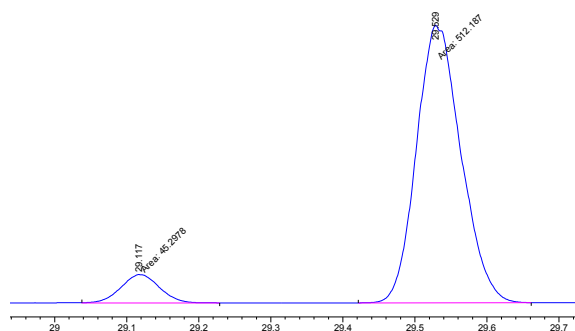

Enantioenriched Sample

| Peak # | RetTime [min] | Type | Width [min] | Area [pA*s] | Height [pA] | Area %   |
|--------|---------------|------|-------------|-------------|-------------|----------|
| 1      | 29.117        | MM   | 0.0619      | 45.29784    | 12.20295    | 8.12539  |
| 2      | 29.529        | MM   | 0.0716      | 512.18719   | 119.22504   | 91.87461 |

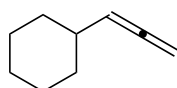

**propa-1,2-dien-1-ylcyclohexane (Table 3, Entry 4 L).** Clear, pale yellow oil.  $R_f = 0.94$  (20:1 pentane:diethyl ether, stain in  $KMnO_4$ ). Spectral data is in accordance with the literature.<sup>11</sup>

<sup>11</sup> N. Nishima, Y. Yamamoto, *Angew. Chem. Int. Ed.* **2006**, *45*, 3314.

**Kinetic resolution to give (*S,E*)-5,9-dimethyldeca-4,8-dien-1-yn-3-yl acetate (Table 3, Entry 5):** The representative procedure was followed with (*E*)-5,9-dimethyldeca-4,8-dien-1-yn-3-yl acetate with the following modification: the reaction was run with 0.5 equivalents of tetramethylammonium triacetoxyborohydride.

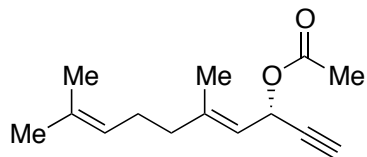

**(*S,E*)-5,9-dimethyldeca-4,8-dien-1-yn-3-yl acetate (Table 3, Entry 5 I).** The crude reaction mixture was purified on silica gel (20:1 pentane:diethyl ether) to afford a clear, yellow oil (44.0 mg, 94% yield).  $R_f = 0.24$  (20:1 pentane:diethyl ether, stain in  $KMnO_4$ ).

**Analysis of Stereochemistry:**

Optical purity was determined by GLC analysis of the title compound as compared to racemic product.

Chiral GLC ( $\beta$ -dex, Supelco, 80 °C for 10 min, ramp 1 °C/min to 160 °C for 10 min, 20 psi) - analysis of title compound.

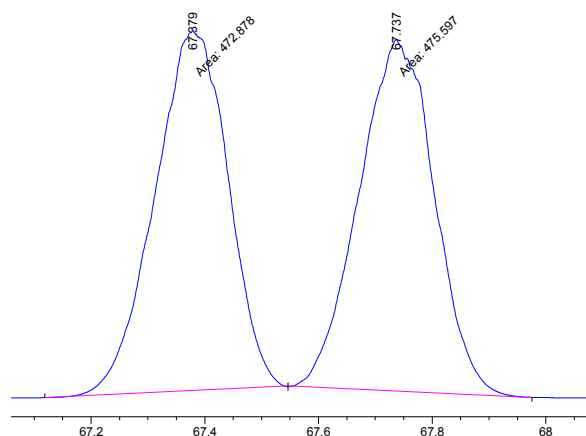

*Racemic Sample*

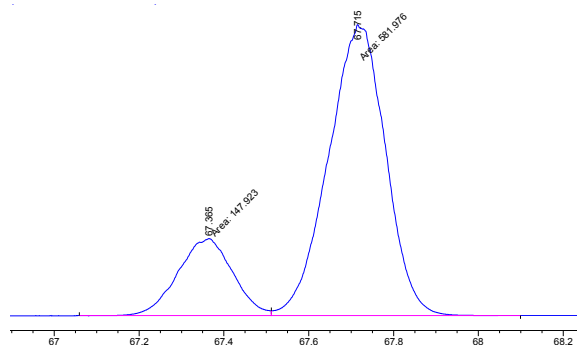

*Enantioenriched Sample*

| Peak # | RetTime [min] | Type | Width [min] | Area [pA*s] | Height [pA] | Area %   |
|--------|---------------|------|-------------|-------------|-------------|----------|
| 1      | 67.365        | MF   | 0.1499      | 147.92336   | 16.44899    | 20.26626 |
| 2      | 67.715        | FM   | 0.1561      | 581.97632   | 62.11814    | 79.73374 |

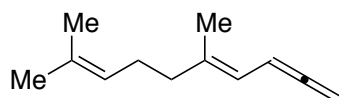

**(*E*)-5,9-dimethyldeca-1,2,4,8-tetraene (Table 3, Entry 5 L).**  $^1H$  NMR (500 MHz,  $CDCl_3$ ):  $\delta$  6.01 (1H, ddd (app dt),  $J = 11.0$  Hz, 7.0 Hz, 7.0 Hz), 5.63 (1H,  $J = 11.0$  Hz, 2.5 Hz, 1.5 Hz), 5.10 (1H, dddd (app tt),  $J = 7.0$  Hz, 7.0 Hz, 1.5 Hz, 1.5 Hz), 4.88 (2H, dddd (app



ddt),  $J = 7.5$  Hz, 2.5 Hz, 1.5 Hz, 1.5 Hz), 2.05-2.13 (4H, m), 1.72 (3H, d,  $J = 1.5$  Hz), 1.69 (3H, d,  $J = 1.0$  Hz), 1.61 (3H, s);  $^{13}\text{C}$  NMR (125 MHz,  $\text{CDCl}_3$ ):  $\delta$ , 211.9, 138.0, 131.7, 123.9, 118.4, 89.8, 75.7, 39.9, 26.6, 25.7, 17.7, 16.5; IR (neat): 2968 (w), 2915 (m), 2855 (w), 1937 (m), 1443 (m), 1377 (m), 876 (m), 845 (s), 818 (w)  $\text{cm}^{-1}$ ; HRMS-(ESI+) for  $\text{C}_{12}\text{H}_{19}$  [M+H]: calculated: 163.14868, found: 163.14926. The crude reaction mixture was purified on silica gel (20:1 pentane:diethyl ether) to afford a clear, pale yellow oil.  $R_f = 0.84$  (20:1 pentane:diethyl ether, stain in  $\text{KMnO}_4$ ).

**Additional Optimization Tables:  
Ligand Screen:**

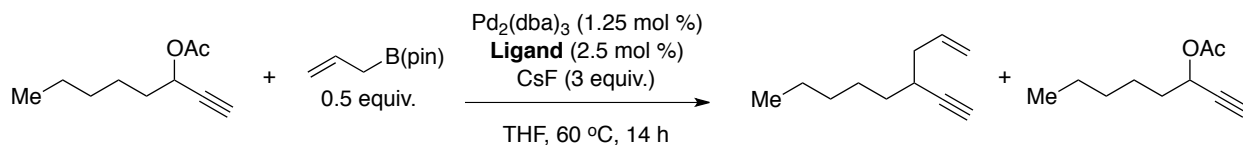

| Ligand                                | e.r. enyne | e.r. recovered acetate | Conversion | s    |
|---------------------------------------|------------|------------------------|------------|------|
| ( <i>R</i> )-MFB                      | 89:11      | 11:89                  | 50%        | 18.6 |
| ( <i>S</i> )-MFB                      | 12:88      | 90:10                  | 56%        | 16.9 |
| ( <i>R</i> )-SEGPLHOS                 | 82:18      | 23:77                  | 46%        | 7.7  |
| ( <i>R,R</i> )-QuinoxP*               | 85:15      | 37:63                  | 27%        | 7.3  |
| ( <i>R</i> )-MeO-BIPHEP               | 77:23      | 16:84                  | 56%        | 6.6  |
| ( <i>R</i> )-C <sub>3</sub> -Tunephos | 76:24      | 29:71                  | 45%        | 4.7  |
| ( <i>R</i> )-Ph-Garphos               | 70:30      | 17:83                  | 63%        | 4.2  |
| ( <i>S</i> )-BINAP                    | 29:71      | 73:27                  | 52%        | 3.8  |
| ( <i>R</i> )-Cl-MeO-BIPHEP            | 67:33      | 25:75                  | 60%        | 3.1  |
| ( <i>R</i> )-xylyl-BINAP              | 60:20      | 39:61                  | 52%        | 1.9  |
| ( <i>R,R</i> )-Me-DUPHOS              | 64:36      | 48:52                  | 13%        | 1.8  |

**Temperature Studies:**

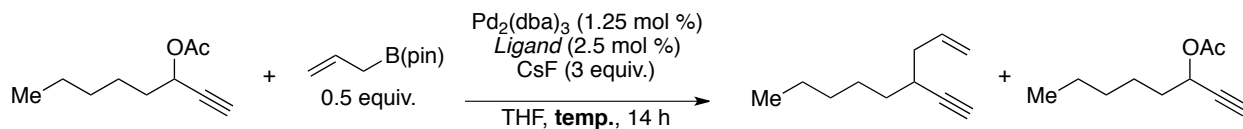

| Ligand             | Temperature (°C) | e.r. enyne | e.r. recovered acetate | conversion | s    |
|--------------------|------------------|------------|------------------------|------------|------|
| ( <i>R</i> )-MFB   | 40               | 94:6       | 40:60                  | 18%        | 17.3 |
|                    | 60               | 89:11      | 11:89                  | 50%        | 18.6 |
|                    | 80               | --         | not recovered          | --         | --   |
| ( <i>S</i> )-BINAP | RT               | 21:79      | 51:49                  | 3%         | 3.8  |
|                    | 40               | 25:75      | 62:38                  | 33%        | 3.7  |
|                    | 60               | 29:71      | 73:27                  | 52%        | 3.8  |

### Solvent Screen (with (S)-BINAP):

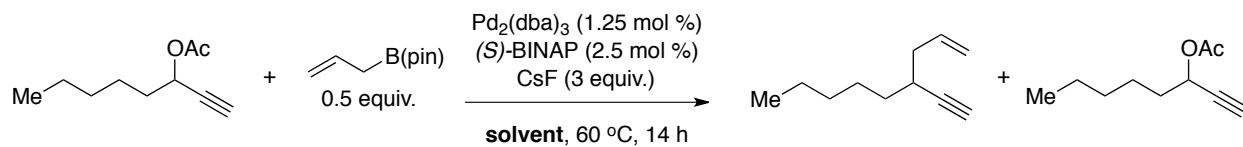

| Solvent         | e.r. enyne | e.r. recovered acetate | conversion | s   |
|-----------------|------------|------------------------|------------|-----|
| 1,4-dioxane     | 27:73      | 73:27                  | 50%        | 4.2 |
| THF             | 29:71      | 73:27                  | 52%        | 3.7 |
| ethylacetate    | 30:70      | 67:33                  | 46%        | 3.2 |
| acetonitrile    | 35:65      | 70:30                  | 57%        | 2.7 |
| dichloromethane | 40:60      | 60:40                  | 50%        | 1.9 |
| toluene         | --         | --                     | --         | --  |

### Solvent Screen (with (R)-MeO(furyl)BIPHEP):

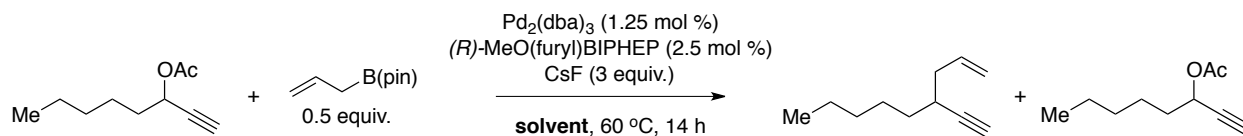

| Solvent         | e.r. enyne | e.r. recovered acetate | conversion | s    |
|-----------------|------------|------------------------|------------|------|
| THF             | 89:11      | 11:89                  | 50%        | 18.6 |
| Me-THF          | 88:12      | 11:89                  | 51%        | 17.1 |
| TBME            | 92:8       | 39:61                  | 20%        | 14.0 |
| acetonitrile    | 90:10      | 40:60                  | 20%        | 11.3 |
| dichloromethane | 84:16      | 15:85                  | 51%        | 10.8 |
| 1,4-dioxane     | 85:15      | 41:59                  | 19%        | 6.7  |
| DMF             | 66:34      | 20:80                  | 65%        | 3.4  |
| dibutyl ether   | --         | --                     | --         | --   |

### Protecting Group Survey (with (S)-BINAP):

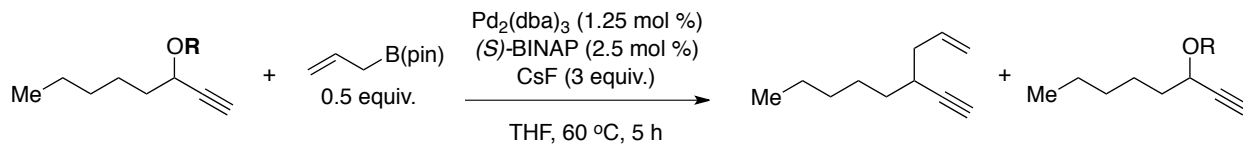

| R     | e.r. enyne | e.r. starting material | conversion | s   |
|-------|------------|------------------------|------------|-----|
|       | 31:69      | 11:89                  | 67%        | 4.9 |
|       | 29:71      | 70:30                  | 52%        | 3.6 |
|       | 46:54      | n.d.                   | 52%        | 1.3 |
| TBS   |            | No reaction            |            |     |
| TBDPS |            | No reaction            |            |     |

a) reaction run for 14h b) reaction run with *rac*-BINAP

### Protecting Group Survey (with (R)-MeO(furyl)BIPHEP):

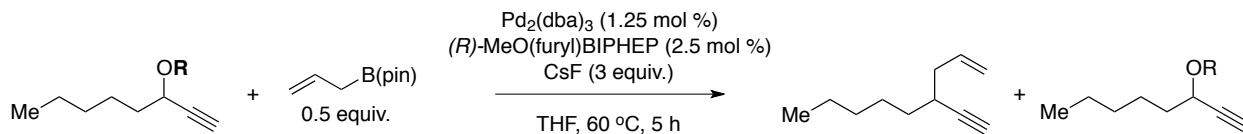

| R | X                | time (h) | e.r. enyne | e.r. starting material | conv. | s    |
|---|------------------|----------|------------|------------------------|-------|------|
|   |                  | 14       | 84:16      | 98:2                   | 59%   | 20.0 |
|   |                  |          | 84:16      | 97:3                   | 58%   | 17.9 |
|   |                  | 14       | 89:11      | 11:89                  | 50%   | 18.6 |
|   |                  |          |            |                        |       |      |
|   | H                | 5        | 92:8       | 59:41                  | 18%   | 12.5 |
|   | OCH <sub>3</sub> | 5        | 81:19      | 98:2                   | 61%   | 15.0 |
|   | Br               | 5        | 92:8       | 44:56                  | 14%   | 12.3 |
|   |                  | 2        | 74:26      | 1:99                   | 67%   | 10.5 |
|   |                  | 5        | 89:11      | n.d.                   | 19%   | 2.7  |

## Computational Details

All calculations were performed using Gaussian 09 with all geometry optimizations, energies and frequencies were calculated at the DFT level utilizing the B3LYP hybrid functional.<sup>12, 13</sup> The 6-31G\*\* basis set was used for the elements C, H, P, and O in conjunction with the LANL2DZ relativistic pseudopotential for Pd. The two oxygens and carbonyl carbon of the acetate group were augmented with diffuse functions. All free energies were calculated at 333.15 K. The PCM model was used to estimate the effect of solvation (THF).<sup>14</sup> The frequency calculations for transition states demonstrated one imaginary frequency each, and were found to be connected with the correct ground states through IRC calculations. NBO analysis was carried out with Gaussian NBO version 3.1.<sup>15</sup> The three-dimensional structures presented in Figure 1 were visualized utilizing CYLview.<sup>16</sup>

### Conformational Analysis about C2-C3 bond:

Begin with dihedral at -172.6, scan 73 steps at +5°/step, optimize maximum 10 cycles/step at B3LYP-PCM(THF)/LANL2DZ-6-31G\*\*.

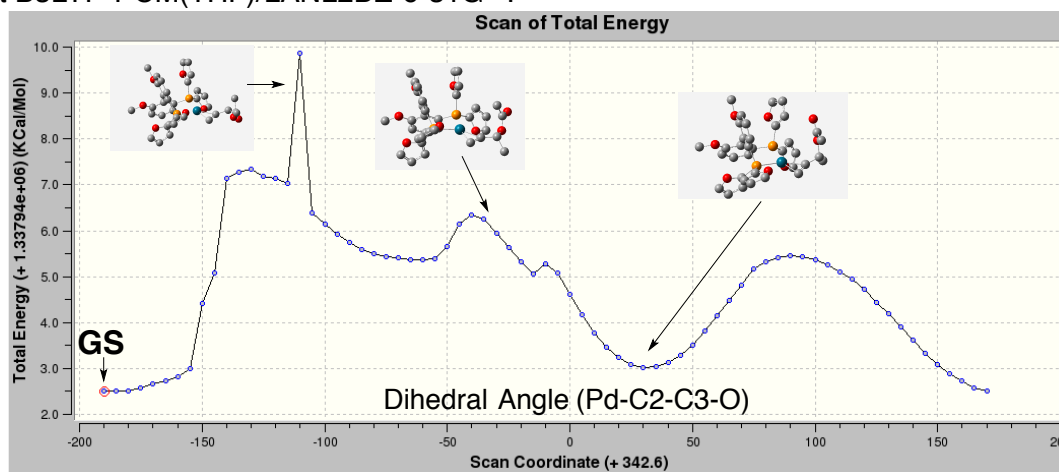

<sup>12</sup> Gaussian 09, Revision A.02, M. J. Frisch, G. W. Trucks, H. B. Schlegel, G. E. Scuseria, M. A. Robb, J. R. Cheeseman, G. Scalmani, V. Barone, B. Mennucci, G. A. Petersson, H. Nakatsuji, M. Caricato, X. Li, H. P. Hratchian, A. F. Izmaylov, J. Bloino, G. Zheng, J. L. Sonnenberg, M. Hada, M. Ehara, K. Toyota, R. Fukuda, J. Hasegawa, M. Ishida, T. Nakajima, Y. Honda, O. Kitao, H. Nakai, T. Vreven, J. A. Montgomery, Jr., J. E. Peralta, F. Ogliaro, M. Bearpark, J. J. Heyd, E. Brothers, K. N. Kudin, V. N. Staroverov, R. Kobayashi, J. Normand, K. Raghavachari, A. Rendell, J. C. Burant, S. S. Iyengar, J. Tomasi, M. Cossi, N. Rega, J. M. Millam, M. Klene, J. E. Knox, J. B. Cross, V. Bakken, C. Adamo, J. Jaramillo, R. Gomperts, R. E. Stratmann, O. Yazyev, A. J. Austin, R. Cammi, C. Pomelli, J. W. Ochterski, R. L. Martin, K. Morokuma, V. G. Zakrzewski, G. A. Voth, P. Salvador, J. J. Dannenberg, S. Dapprich, A. D. Daniels, Ö. Farkas, J. B. Foresman, J. V. Ortiz, J. Cioslowski, and D. J. Fox, Gaussian, Inc., Wallingford CT, 2009.

<sup>13</sup> (a) A. D. Becke, *Phys. Rev. A* 1988, 38, 3098; (b) C. Lee, W. Yang, R. G. Parr, *Phys. Rev. B* 1988, 37, 785.

<sup>14</sup> (a) S. Miertus, E. Scrocco, J. Tomassi, *Chem. Phys.* **1981**, 55, 117. (b) V. Barone, M. Cossi, J. Tomassi, *Chem. Phys.* **1997**, 107, 3210.

<sup>15</sup> NBO Version 3.1, E. D. Glendening, A. E. Reed, J. E. Carpenter, and F. Weinhold.

<sup>16</sup> CYLview, 1.0b; Legault, C. Y., Université de Sherbrooke, 2009 (<http://www.cylview.org>).

## Substrate\_1

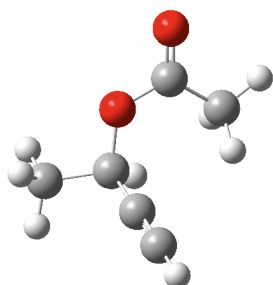

-----  
Cartesian coordinates (Angstroms):  
-----

C -1.495 0.802 -0.127  
C -2.014 1.812 -0.541  
C -0.872 -0.424 0.381  
O 0.347 -0.718 -0.368  
C 1.517 -0.069 -0.135  
C 1.587 0.938 0.988  
O 2.465 -0.354 -0.842  
H 0.825 1.714 0.875  
H 2.577 1.393 0.979  
H 1.430 0.449 1.955  
C -1.769 -1.650 0.228  
H -0.615 -0.295 1.437  
H -2.474 2.702 -0.910  
H -2.002 -1.823 -0.826  
H -2.701 -1.497 0.776  
H -1.260 -2.529 0.632

|                                                        | 1       | 2       | 3           |
|--------------------------------------------------------|---------|---------|-------------|
|                                                        | A       | A       | A           |
| Frequencies --                                         | 68.3435 | 82.6680 | 163.7823    |
| Red. masses --                                         | 3.4125  | 6.4939  | 1.4562      |
| ZERO-POINT CORRECTION= 0.126910 (HARTREE/<br>PARTICLE) |         |         |             |
| Thermal correction to Energy=                          |         |         | 0.137866    |
| Thermal correction to Enthalpy=                        |         |         | 0.138921    |
| Thermal correction to Gibbs Free Energy=               |         |         | 0.087702    |
| Sum of electronic and zero-point Energies=             |         |         | -383.735811 |
| Sum of electronic and thermal Energies=                |         |         | -383.724854 |
| Sum of electronic and thermal Enthalpies=              |         |         | -383.723799 |
| Sum of electronic and thermal Free Energies=           |         |         | -383.775018 |

| ITEM          | VALUE    | THRESHOLD | CONVERGED? |
|---------------|----------|-----------|------------|
| MAXIMUM FORCE | 0.000041 | 0.000450  | YES        |
| RMS FORCE     | 0.000008 | 0.000300  | YES        |

## Catalyst\_a

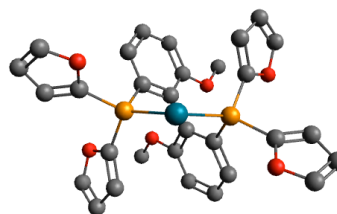

-----  
Cartesian coordinates (Angstroms):  
-----

Pd 0.000 -2.186 -0.000  
P 1.930 -0.943 -0.041  
O 3.377 0.782 1.596  
O -1.118 3.159 -1.141  
O 3.482 -2.436 -1.696  
C 2.487 -0.269 1.549  
C 2.195 -0.668 2.826  
H 1.518 -1.467 3.094  
C 2.939 0.177 3.708  
H 2.952 0.150 4.788  
C 3.635 1.034 2.909  
H 4.325 1.840 3.107  
C 1.401 0.527 -1.063  
C 0.330 1.363 -0.677  
C -0.106 2.360 -1.585  
C 0.481 2.503 -2.847  
H 0.135 3.261 -3.538  
C 1.528 1.658 -3.210  
H 1.990 1.767 -4.187  
C 1.987 0.684 -2.331  
H 2.804 0.040 -2.634  
C -1.608 4.182 -2.000  
H -0.825 4.906 -2.254  
H -2.397 4.687 -1.442  
H -2.028 3.764 -2.923  
C 3.538 -1.412 -0.771  
C 4.758 -2.698 -2.091  
H 4.872 -3.482 -2.825  
C 5.636 -1.882 -1.444  
H 6.711 -1.874 -1.558  
C 4.848 -1.047 -0.591  
H 5.199 -0.271 0.072  
P -1.930 -0.943 0.041  
O -3.377 0.782 -1.596  
O 1.118 3.159 1.141  
O -3.482 -2.436 1.696  
C -2.487 -0.269 -1.549  
C -2.195 -0.668 -2.826  
H -1.518 -1.467 -3.094  
C -2.939 0.177 -3.708  
H -2.952 0.150 -4.788  
C -3.635 1.034 -2.909  
H -4.325 1.840 -3.107  
C -1.401 0.527 1.063  
C -0.330 1.363 0.677

C 0.106 2.360 1.585  
 C -0.481 2.503 2.847  
 H -0.135 3.261 3.538  
 C -1.528 1.658 3.210  
 H -1.990 1.767 4.187  
 C -1.987 0.684 2.331  
 H -2.804 0.040 2.634  
 C 1.608 4.182 2.000  
 H 0.825 4.906 2.254  
 H 2.397 4.687 1.442  
 H 2.028 3.764 2.923  
 C -3.538 -1.412 0.771  
 C -4.758 -2.698 2.091  
 H -4.872 -3.482 2.825  
 C -5.636 -1.882 1.444  
 H -6.711 -1.874 1.558  
 C -4.848 -1.047 0.591  
 H -5.199 -0.271 -0.072

|                                              | 1                           | 2       | 3       |
|----------------------------------------------|-----------------------------|---------|---------|
|                                              | A                           | A       | A       |
| Frequencies --                               | -5.3361                     | 22.6076 | 34.1663 |
| Red. masses --                               | 6.9580                      | 6.1620  | 4.9712  |
| Zero-Point Correction=                       | 0.472240 (Hartree/Particle) |         |         |
| Thermal correction to Energy=                | 0.515390                    |         |         |
| Thermal correction to Enthalpy=              | 0.516445                    |         |         |
| Thermal correction to Gibbs Free Energy=     | 0.389564                    |         |         |
| Sum of electronic and zero-point Energies=   | -2417.878386                |         |         |
| Sum of electronic and thermal Energies=      | -2417.835236                |         |         |
| Sum of electronic and thermal Enthalpies=    | -2417.834180                |         |         |
| Sum of electronic and thermal Free Energies= | -2417.961062                |         |         |

| Item          | Value    | Threshold | Converged? |
|---------------|----------|-----------|------------|
| Maximum Force | 0.000000 | 0.000002  | YES        |
| RMS Force     | 0.000000 | 0.000001  | YES        |

**NOTE:** We were unable to optimize the geometry to remove the small negative frequency listed (-5.3361) despite use of Ultrafine integration and Varytight convergence criteria. Its effect on the free energy of the complex should be negligible however the total energy of the unbound catalyst and substrate could be slightly lower than the 4.9 kcal/mol listed in the report.

## GS\_fast

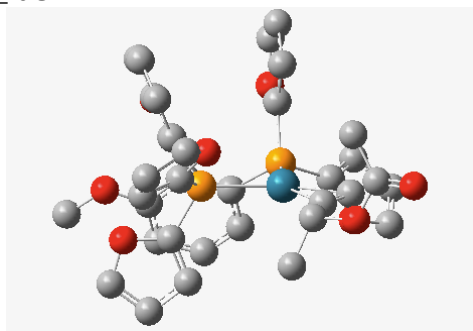

-----  
 Cartesian coordinates (Angstroms):  
 -----

Pd 1.384 0.700 -0.275  
 P 0.466 -1.492 -0.017  
 O -0.840 -3.480 -1.448  
 O -4.314 -0.147 1.529  
 O 2.555 -2.368 1.507  
 C -0.133 -2.299 -1.523  
 C 0.035 -1.953 -2.837  
 H 0.545 -1.070 -3.195  
 C -0.600 -2.970 -3.618  
 H -0.668 -3.024 -4.695  
 C -1.112 -3.864 -2.726  
 H -1.669 -4.783 -2.832  
 C -0.955 -1.506 1.176  
 C -2.172 -0.864 0.872  
 C -3.157 -0.769 1.887  
 C -2.929 -1.290 3.165  
 H -3.684 -1.214 3.938  
 C -1.715 -1.915 3.443  
 H -1.537 -2.323 4.434  
 C -0.734 -2.024 2.463  
 H 0.204 -2.511 2.702  
 C -5.336 0.011 2.507  
 H -5.701 -0.957 2.870  
 H -6.149 0.536 2.005  
 H -4.988 0.609 3.357  
 C 1.577 -2.786 0.630  
 C 3.289 -3.464 1.849  
 H 4.096 -3.291 2.545  
 C 2.818 -4.572 1.212  
 H 3.210 -5.576 1.291  
 C 1.706 -4.135 0.425  
 H 1.075 -4.741 -0.208  
 P -0.713 1.845 -0.175  
 O -2.597 2.760 1.646  
 O -3.862 -2.264 -0.694  
 O 0.003 3.657 -2.081  
 C -1.329 2.249 1.479  
 C -0.707 2.172 2.697  
 H 0.293 1.801 2.870  
 C -1.637 2.658 3.669  
 H -1.489 2.740 4.736  
 C -2.762 2.997 2.977  
 H -3.718 3.405 3.267

C -2.071 0.891 -1.007  
 C -2.532 -0.335 -0.487  
 C -3.449 -1.094 -1.256  
 C -3.884 -0.648 -2.508  
 H -4.582 -1.232 -3.094  
 C -3.411 0.566 -3.003  
 H -3.751 0.917 -3.974  
 C -2.514 1.331 -2.266  
 H -2.158 2.270 -2.672  
 C -4.787 -3.075 -1.410  
 H -5.730 -2.546 -1.593  
 H -4.977 -3.941 -0.775  
 H -4.369 -3.413 -2.366  
 C -0.791 3.484 -0.968  
 C -0.161 4.941 -2.502  
 H 0.403 5.225 -3.377  
 C -1.032 5.602 -1.688  
 H -1.342 6.633 -1.780  
 C -1.443 4.658 -0.695  
 H -2.137 4.822 0.115  
 C 3.484 0.784 -0.473  
 C 3.041 1.976 -0.480  
 C 4.599 -0.187 -0.524  
 O 5.900 0.500 -0.502  
 C 6.438 0.990 0.635  
 C 5.739 0.734 1.951  
 O 7.489 1.604 0.550  
 H 4.692 1.044 1.913  
 H 6.261 1.286 2.732  
 H 5.766 -0.334 2.193  
 H 3.218 3.036 -0.539  
 C 4.608 -1.026 -1.800  
 H 4.548 -0.853 0.342  
 H 5.447 -1.727 -1.781  
 H 4.700 -0.382 -2.678  
 H 3.675 -1.589 -1.875

|                                                        | 1       | 2            | 3       |
|--------------------------------------------------------|---------|--------------|---------|
|                                                        | A       | A            | A       |
| Frequencies --                                         | 11.2295 | 17.6838      | 22.5356 |
| Red. masses --                                         | 6.7711  | 7.2334       | 6.6926  |
| ZERO-POINT CORRECTION= 0.601030 (HARTREE/<br>PARTICLE) |         |              |         |
| Thermal correction to Energy=                          |         | 0.657588     |         |
| Thermal correction to Enthalpy=                        |         | 0.658643     |         |
| Thermal correction to Gibbs Free Energy=               |         | 0.499264     |         |
| Sum of electronic and zero-point Energies=             |         | -2801.644974 |         |
| Sum of electronic and thermal Energies=                |         | -2801.588416 |         |
| Sum of electronic and thermal Enthalpies=              |         | -2801.587361 |         |
| Sum of electronic and thermal Free Energies=           |         | -2801.746740 |         |

| ITEM          | VALUE    | THRESHOLD | CONVERGED? |
|---------------|----------|-----------|------------|
| MAXIMUM FORCE | 0.000034 | 0.000450  | YES        |
| RMS FORCE     | 0.000003 | 0.000300  | YES        |

## GS\_slow

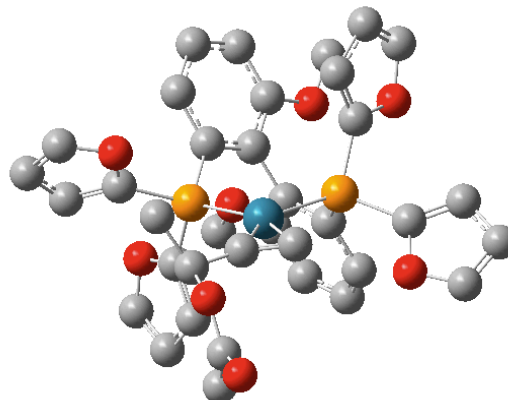

### Cartesian coordinates (Angstroms):

Pd -1.433 0.524 -0.377  
 P -0.320 -1.589 -0.172  
 O 0.673 -3.262 1.806  
 O 4.606 0.066 -0.517  
 O -1.766 -2.875 -2.098  
 C -0.106 -2.160 1.533  
 C -0.649 -1.688 2.699  
 H -1.292 -0.825 2.787  
 C -0.182 -2.540 3.748  
 H -0.405 -2.466 4.803  
 C 0.613 -3.472 3.150  
 H 1.180 -4.312 3.521  
 C 1.381 -1.575 -0.922  
 C 2.419 -0.789 -0.382  
 C 3.643 -0.704 -1.094  
 C 3.820 -1.374 -2.308  
 H 4.755 -1.304 -2.850  
 C 2.777 -2.141 -2.825  
 H 2.913 -2.664 -3.767  
 C 1.568 -2.242 -2.144  
 H 0.770 -2.840 -2.568  
 C 5.859 0.201 -1.178  
 H 6.361 -0.767 -1.292  
 H 6.464 0.847 -0.540  
 H 5.745 0.669 -2.163  
 C -1.084 -3.070 -0.916  
 C -2.277 -4.081 -2.476  
 H -2.839 -4.085 -3.398  
 C -1.952 -5.042 -1.568  
 H -2.228 -6.086 -1.609  
 C -1.176 -4.390 -0.558  
 H -0.732 -4.840 0.317  
 P 0.543 1.842 -0.152  
 O 2.793 2.677 -1.546  
 O 3.688 -1.825 1.765  
 O -0.786 3.817 1.184



C 1.550 2.089 -1.635  
 C 1.266 1.826 -2.949  
 H 0.362 1.361 -3.316  
 C 2.389 2.272 -3.713  
 H 2.516 2.221 -4.785  
 C 3.281 2.776 -2.813  
 H 4.260 3.222 -2.907  
 C 1.678 1.145 1.138  
 C 2.345 -0.080 0.939  
 C 3.058 -0.646 2.024  
 C 3.095 -0.013 3.271  
 H 3.639 -0.451 4.099  
 C 2.424 1.196 3.446  
 H 2.455 1.690 4.412  
 C 1.719 1.773 2.395  
 H 1.200 2.711 2.552  
 C 4.412 -2.458 2.815  
 H 5.232 -1.826 3.177  
 H 4.823 -3.371 2.384  
 H 3.755 -2.717 3.654  
 C 0.301 3.570 0.375  
 C -0.814 5.156 1.430  
 H -1.619 5.502 2.059  
 C 0.220 5.779 0.797  
 H 0.439 6.837 0.811  
 C 0.946 4.752 0.115  
 H 1.835 4.867 -0.486  
 C -3.554 0.586 -0.544  
 C -3.095 1.772 -0.537  
 C -4.719 -0.326 -0.608  
 O -5.979 0.414 -0.421  
 C -6.409 0.812 0.795  
 C -5.634 0.392 2.023  
 O -7.429 1.479 0.849  
 H -3.251 2.837 -0.553  
 H -4.578 0.659 1.936  
 H -5.698 -0.693 2.161  
 H -6.069 0.885 2.892  
 C -4.859 -1.016 -1.963  
 H -4.653 -1.084 0.177  
 H -5.724 -1.686 -1.955  
 H -3.958 -1.593 -2.172  
 H -4.992 -0.271 -2.753

|                                                        | 1       | 2            | 3       |
|--------------------------------------------------------|---------|--------------|---------|
|                                                        | A       | A            | A       |
| Frequencies --                                         | 11.0995 | 17.5785      | 24.2125 |
| Red. masses --                                         | 6.9213  | 5.1950       | 6.5240  |
| ZERO-POINT CORRECTION= 0.601564 (HARTREE/<br>PARTICLE) |         |              |         |
| Thermal correction to Energy=                          |         | 0.657801     |         |
| Thermal correction to Enthalpy=                        |         | 0.658856     |         |
| Thermal correction to Gibbs Free Energy                |         | 0.501656     |         |
| Sum of electronic and zero-point Energies=             |         | -2801.643521 |         |
| Sum of electronic and thermal Energies=                |         | -2801.587284 |         |
| Sum of electronic and thermal Enthalpies=              |         | -2801.586229 |         |
| Sum of electronic and thermal Free Energies=           |         | -2801.743429 |         |

| ITEM          | VALUE    | THRESHOLD | CONVERGED? |
|---------------|----------|-----------|------------|
| MAXIMUM FORCE | 0.000011 | 0.000450  | YES        |
| RMS FORCE     | 0.000002 | 0.000300  | YES        |

## TS\_fast

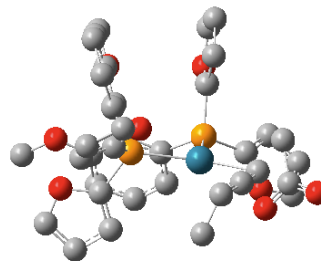

-----  
 Cartesian coordinates (Angstroms):  
 -----

Pd 1.361 0.501 -0.269  
 P 0.242 -1.604 0.020  
 O -1.177 -3.509 -1.394  
 O -4.363 0.290 1.479  
 O 2.270 -2.523 1.585  
 C -0.386 -2.386 -1.482  
 C -0.176 -2.077 -2.800  
 H 0.402 -1.242 -3.169  
 C -0.874 -3.060 -3.569  
 H -0.933 -3.130 -4.645  
 C -1.461 -3.897 -2.667  
 H -2.081 -4.776 -2.764  
 C -1.184 -1.456 1.191  
 C -2.313 -0.680 0.861  
 C -3.296 -0.464 1.859  
 C -3.151 -1.004 3.141  
 H -3.903 -0.835 3.901  
 C -2.024 -1.767 3.441  
 H -1.913 -2.189 4.436  
 C -1.044 -1.992 2.480  
 H -0.173 -2.585 2.734  
 C -5.392 0.546 2.429  
 H -5.860 -0.382 2.776  
 H -6.135 1.151 1.907  
 H -5.011 1.106 3.291  
 C 1.276 -2.925 0.719  
 C 2.952 -3.640 1.962  
 H 3.767 -3.482 2.652  
 C 2.430 -4.745 1.359  
 H 2.777 -5.762 1.471  
 C 1.342 -4.284 0.555  
 H 0.686 -4.879 -0.063  
 P -0.556 1.842 -0.188  
 O -2.317 2.892 1.656  
 O -4.116 -1.901 -0.725  
 O 0.424 3.566 -2.057  
 C -1.101 2.272 1.477  
 C -0.476 2.130 2.687  
 H 0.488 1.670 2.849  
 C -1.351 2.691 3.669

```

H -1.187 2.751 4.735
C -2.447 3.134 2.989
H -3.360 3.623 3.291
C -1.980 1.025 -1.037
C -2.585 -0.132 -0.509
C -3.565 -0.795 -1.291
C -3.918 -0.319 -2.558
H -4.665 -0.830 -3.152
C -3.301 0.826 -3.059
H -3.578 1.197 -4.041
C -2.338 1.496 -2.312
H -1.867 2.382 -2.720
C -5.093 -2.632 -1.460
H -5.975 -2.019 -1.680
H -5.384 -3.466 -0.820
H -4.679 -3.022 -2.397
C -0.417 3.473 -0.970
C 0.405 4.862 -2.470
H 1.023 5.092 -3.325
C -0.418 5.606 -1.678
H -0.618 6.663 -1.771
C -0.954 4.705 -0.705
H -1.651 4.935 0.087
C 3.576 0.816 -0.501
C 2.893 1.886 -0.452
C 4.208 -0.398 -0.542
O 6.355 0.039 -0.489
C 6.959 0.616 0.490
C 6.172 0.816 1.791
O 8.149 1.001 0.438
H 2.964 2.960 -0.475
H 5.917 -0.158 2.225
H 5.233 1.345 1.599
H 6.763 1.378 2.516
C 4.338 -1.207 -1.802
H 4.346 -0.921 0.398
H 4.253 -0.578 -2.690
H 3.550 -1.968 -1.832
H 5.303 -1.716 -1.808

```

```

          1          2          3
          A          A          A
Frequencies -- -196.5413    11.2047    17.9448
Red. masses --   6.7132     6.6021     7.8575
ZERO-POINT CORRECTION= 0.597855 (HARTREE/
PARTICLE)
Thermal correction to Energy=      0.655029
Thermal correction to Enthalpy=    0.656084
Thermal correction to Gibbs Free Energy= 0.494517
Sum of electronic and zero-point Energies= -2801.618847
Sum of electronic and thermal Energies= -2801.561673
Sum of electronic and thermal Enthalpies= -2801.560618
Sum of electronic and thermal Free Energies= -2801.722185

```

| ITEM          | VALUE    | THRESHOLD | CONVERGED? |
|---------------|----------|-----------|------------|
| MAXIMUM FORCE | 0.000006 | 0.000450  | YES        |
| RMS FORCE     | 0.000001 | 0.000300  | YES        |

## TS\_Slow

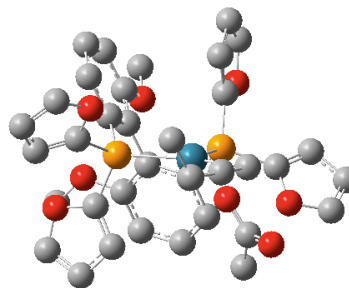

-----  
Cartesian coordinates (Angstroms):  
-----

```

Pd -1.404 0.318 -0.319
P -0.067 -1.688 -0.120
O 1.110 -3.201 1.875
O 4.607 0.532 -0.597
O -1.435 -3.097 -2.015
C 0.215 -2.195 1.589
C -0.371 -1.761 2.749
H -1.106 -0.973 2.827
C 0.191 -2.538 3.809
H -0.034 -2.469 4.864
C 1.080 -3.390 3.223
H 1.736 -4.157 3.605
C 1.598 -1.489 -0.910
C 2.543 -0.576 -0.403
C 3.733 -0.357 -1.141
C 3.964 -1.025 -2.348
H 4.874 -0.856 -2.910
C 3.012 -1.920 -2.830
H 3.192 -2.442 -3.765
C 1.836 -2.153 -2.124
H 1.107 -2.850 -2.519
C 5.829 0.796 -1.279
H 6.437 -0.110 -1.380
H 6.362 1.522 -0.663
H 5.649 1.226 -2.271
C -0.715 -3.225 -0.846
C -1.836 -4.349 -2.379
H -2.415 -4.410 -3.288
C -1.402 -5.271 -1.476
H -1.578 -6.336 -1.509
C -0.672 -4.544 -0.483
H -0.171 -4.946 0.385
P 0.374 1.828 -0.134
O 2.434 2.852 -1.655
O 3.969 -1.433 1.718
O -1.106 3.660 1.250
C 1.265 2.124 -1.673
C 0.953 1.791 -2.965
H 0.094 1.216 -3.278
C 1.983 2.339 -3.790
H 2.067 2.271 -4.865

```

C 2.850 2.968 -2.946  
 H 3.765 3.519 -3.097  
 C 1.594 1.258 1.131  
 C 2.409 0.129 0.914  
 C 3.204 -0.342 1.989  
 C 3.181 0.293 3.235  
 H 3.790 -0.070 4.053  
 C 2.363 1.406 3.423  
 H 2.346 1.900 4.390  
 C 1.571 1.887 2.387  
 H 0.936 2.748 2.557  
 C 4.789 -1.970 2.752  
 H 5.530 -1.240 3.098  
 H 5.303 -2.823 2.310  
 H 4.187 -2.309 3.603  
 C -0.057 3.519 0.369  
 C -1.270 4.994 1.471  
 H -2.065 5.262 2.150  
 C -0.362 5.712 0.753  
 H -0.266 6.788 0.731  
 C 0.428 4.758 0.040  
 H 1.253 4.959 -0.626  
 C -3.669 0.559 -0.503  
 C -2.987 1.630 -0.458  
 C -4.347 -0.627 -0.542  
 O -6.510 -0.123 -0.419  
 C -7.079 0.452 0.580  
 C -6.245 0.648 1.852  
 O -8.271 0.836 0.574  
 H -3.075 2.703 -0.432  
 H -5.298 1.144 1.624  
 H -6.007 -0.328 2.292  
 H -6.796 1.238 2.587  
 C -4.562 -1.397 -1.812  
 H -4.485 -1.156 0.394  
 H -5.480 -1.982 -1.736  
 H -3.722 -2.080 -1.967  
 H -4.629 -0.727 -2.672

|                                                        | 1         | 2       | 3            |
|--------------------------------------------------------|-----------|---------|--------------|
|                                                        | A         | A       | A            |
| Frequencies --                                         | -165.6350 | 11.7929 | 19.9046      |
| Red. masses --                                         | 7.3473    | 6.8965  | 6.0386       |
| ZERO-POINT CORRECTION= 0.598051 (HARTREE/<br>PARTICLE) |           |         |              |
| Thermal correction to Energy=                          |           |         | 0.655139     |
| Thermal correction to Enthalpy=                        |           |         | 0.656194     |
| Thermal correction to Gibbs Free Energy=               |           |         | 0.495641     |
| Sum of electronic and zero-point Energies=             |           |         | -2801.617730 |
| Sum of electronic and thermal Energies=                |           |         | -2801.560641 |
| Sum of electronic and thermal Enthalpies=              |           |         | -2801.559586 |
| Sum of electronic and thermal Free Energies=           |           |         | -2801.720140 |

| ITEM          | VALUE    | THRESHOLD | CONVERGED? |
|---------------|----------|-----------|------------|
| MAXIMUM FORCE | 0.000002 | 0.000450  | YES        |
| RMS FORCE     | 0.000000 | 0.000300  | YES        |

## Int\_a\_fast

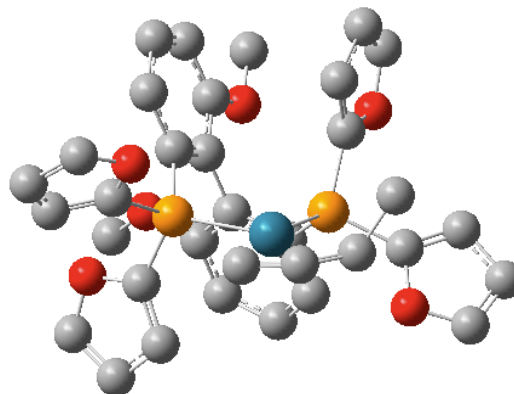

-----  
 Cartesian coordinates (Angstroms):  
 -----

Pd 0.694 -1.939 -0.144  
 P 1.742 0.176 -0.145  
 O 2.554 2.112 1.628  
 O -2.436 3.150 -0.902  
 O 3.556 -0.637 -2.012  
 C 2.080 0.828 1.499  
 C 1.986 0.245 2.735  
 H 1.638 -0.758 2.939  
 C 2.424 1.222 3.681  
 H 2.483 1.114 4.754  
 C 2.754 2.329 2.956  
 H 3.131 3.305 3.221  
 C 0.762 1.431 -1.076  
 C -0.479 1.890 -0.594  
 C -1.250 2.743 -1.422  
 C -0.789 3.120 -2.688  
 H -1.379 3.773 -3.319  
 C 0.442 2.651 -3.141  
 H 0.800 2.948 -4.122  
 C 1.217 1.809 -2.349  
 H 2.168 1.452 -2.723  
 C -3.256 4.029 -1.668  
 H -2.740 4.972 -1.884  
 H -4.132 4.230 -1.051  
 H -3.573 3.563 -2.608  
 C 3.381 0.184 -0.920  
 C 4.846 -0.483 -2.425  
 H 5.135 -1.067 -3.285  
 C 5.501 0.404 -1.626  
 H 6.533 0.712 -1.717  
 C 4.552 0.840 -0.649  
 H 4.712 1.554 0.145  
 P -1.499 -1.109 0.022  
 O -3.435 -0.016 -1.585  
 O -0.412 3.787 1.326  
 O -2.232 -3.171 1.649  
 C -2.222 -0.663 -1.563

C -1.799 -0.897 -2.845  
 H -0.878 -1.383 -3.129  
 C -2.804 -0.363 -3.708  
 H -2.807 -0.363 -4.789  
 C -3.766 0.157 -2.894  
 H -4.705 0.658 -3.078  
 C -1.586 0.354 1.139  
 C -1.009 1.585 0.775  
 C -0.981 2.626 1.736  
 C -1.513 2.433 3.017  
 H -1.491 3.230 3.749  
 C -2.076 1.203 3.351  
 H -2.491 1.057 4.344  
 C -2.114 0.164 2.426  
 H -2.552 -0.785 2.708  
 C -0.349 4.881 2.238  
 H -1.350 5.204 2.547  
 H 0.140 5.691 1.696  
 H 0.243 4.628 3.125  
 C -2.692 -2.296 0.691  
 C -3.280 -3.970 1.996  
 H -3.072 -4.716 2.748  
 C -4.393 -3.634 1.286  
 H -5.364 -4.103 1.353  
 C -4.015 -2.546 0.440  
 H -4.640 -2.012 -0.260  
 C 1.471 -3.998 -0.305  
 C 0.212 -4.067 -0.335  
 C 2.644 -3.279 -0.196  
 H -0.684 -4.652 -0.408  
 C 3.480 -3.268 1.061  
 H 3.158 -3.032 -1.123  
 H 4.018 -2.320 1.150  
 H 4.233 -4.066 1.012  
 H 2.872 -3.423 1.954

|                                                        | 1       | 2       | 3            |
|--------------------------------------------------------|---------|---------|--------------|
|                                                        | A       | A       | A            |
| Frequencies --                                         | 17.8034 | 32.8908 | 37.5770      |
| Red. masses --                                         | 6.3208  | 4.7296  | 4.8137       |
| ZERO-POINT CORRECTION= 0.548680 (HARTREE/<br>PARTICLE) |         |         |              |
| Thermal correction to Energy=                          |         |         | 0.599446     |
| Thermal correction to Enthalpy=                        |         |         | 0.600501     |
| Thermal correction to Gibbs Free Energy=               |         |         | 0.456784     |
| Sum of electronic and zero-point Energies=             |         |         | -2573.045691 |
| Sum of electronic and thermal Energies=                |         |         | -2572.994926 |
| Sum of electronic and thermal Enthalpies=              |         |         | -2572.993871 |
| Sum of electronic and thermal Free Energies=           |         |         | -2573.137588 |

| ITEM          | VALUE    | THRESHOLD | CONVERGED? |
|---------------|----------|-----------|------------|
| MAXIMUM FORCE | 0.000006 | 0.000450  | YES        |
| RMS FORCE     | 0.000001 | 0.000300  | YES        |

### Int\_a\_slow

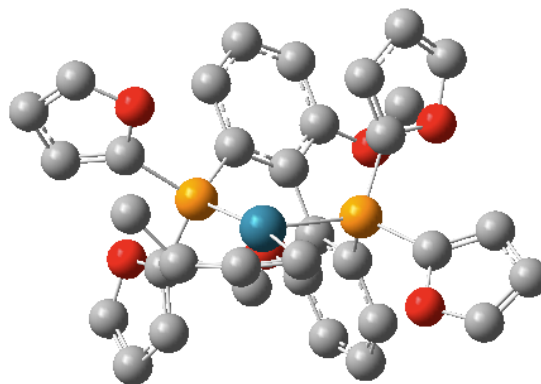

-----  
 Cartesian coordinates (Angstroms):  
 -----

Pd -0.665 -1.943 -0.177  
 P -1.719 0.172 0.091  
 O -2.756 2.170 -1.486  
 O 2.421 3.183 0.892  
 O -3.295 -0.734 2.110  
 C -2.190 0.916 -1.479  
 C -2.088 0.450 -2.764  
 H -1.671 -0.501 -3.062  
 C -2.621 1.469 -3.612  
 H -2.702 1.450 -4.688  
 C -3.007 2.483 -2.785  
 H -3.460 3.448 -2.956  
 C -0.766 1.439 1.037  
 C 0.481 1.897 0.573  
 C 1.225 2.781 1.394  
 C 0.728 3.194 2.636  
 H 1.296 3.871 3.261  
 C -0.512 2.731 3.069  
 H -0.899 3.056 4.029  
 C -1.258 1.857 2.284  
 H -2.216 1.507 2.645  
 C 3.216 4.088 1.655  
 H 2.692 5.035 1.826  
 H 4.110 4.271 1.058  
 H 3.506 3.651 2.618  
 C -3.296 0.043 0.974  
 C -4.563 -0.714 2.609  
 H -4.722 -1.281 3.513  
 C -5.375 0.045 1.821  
 H -6.427 0.234 1.974  
 C -4.553 0.541 0.759  
 H -4.851 1.190 -0.051  
 P 1.523 -1.127 0.027  
 O 3.195 0.028 1.872  
 O 0.431 3.741 -1.395  
 O 2.633 -3.074 -1.545

C 2.022 -0.666 1.691  
 C 1.456 -0.942 2.908  
 H 0.528 -1.472 3.070  
 C 2.325 -0.387 3.896  
 H 2.195 -0.409 4.968  
 C 3.356 0.188 3.215  
 H 4.242 0.724 3.520  
 C 1.651 0.333 -1.092  
 C 1.049 1.564 -0.773  
 C 1.033 2.581 -1.760  
 C 1.608 2.369 -3.018  
 H 1.596 3.149 -3.769  
 C 2.202 1.142 -3.306  
 H 2.652 0.981 -4.281  
 C 2.224 0.124 -2.358  
 H 2.680 -0.826 -2.608  
 C 0.373 4.811 -2.336  
 H 1.375 5.144 -2.627  
 H -0.145 5.625 -1.827  
 H -0.193 4.525 -3.230  
 C 2.861 -2.241 -0.474  
 C 3.766 -3.812 -1.726  
 H 3.740 -4.517 -2.542  
 C 4.707 -3.478 -0.799  
 H 5.695 -3.904 -0.703  
 C 4.123 -2.457 0.014  
 H 4.580 -1.943 0.846  
 C -1.434 -3.949 -0.723  
 C -0.190 -4.028 -0.522  
 C -2.625 -3.267 -0.789  
 H 0.703 -4.622 -0.537  
 H -2.925 -2.905 -1.772  
 C -3.727 -3.420 0.228  
 H -4.334 -2.514 0.271  
 H -3.336 -3.643 1.223  
 H -4.388 -4.241 -0.077

|                                              | 1                           | 2       | 3       |
|----------------------------------------------|-----------------------------|---------|---------|
|                                              | A                           | A       | A       |
| Frequencies --                               | 14.3167                     | 32.5559 | 36.6284 |
| Red. masses --                               | 6.3825                      | 5.4051  | 4.0664  |
| ZERO-POINT CORRECTION=                       | 0.548820 (HARTREE/PARTICLE) |         |         |
| Thermal correction to Energy=                | 0.599547                    |         |         |
| Thermal correction to Enthalpy=              | 0.600602                    |         |         |
| Thermal correction to Gibbs Free Energy=     | 0.457063                    |         |         |
| Sum of electronic and zero-point Energies=   | -2573.043058                |         |         |
| Sum of electronic and thermal Energies=      | -2572.992331                |         |         |
| Sum of electronic and thermal Enthalpies=    | -2572.991276                |         |         |
| Sum of electronic and thermal Free Energies= | -2573.134815                |         |         |

| ITEM          | VALUE    | THRESHOLD | CONVERGED? |
|---------------|----------|-----------|------------|
| MAXIMUM FORCE | 0.000020 | 0.000450  | YES        |
| RMS FORCE     | 0.000003 | 0.000300  | YES        |

**-OAc**

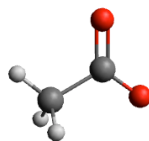

-----  
 Cartesian coordinates (Angstroms):  
 -----

O -0.803 -1.108 0.002  
 C -0.191 -0.000 -0.008  
 O -0.721 1.150 0.002  
 C 1.353 -0.039 -0.003  
 H 1.741 -1.032 -0.243  
 H 1.715 0.241 0.994  
 H 1.757 0.692 -0.710

|                                              | 1                           | 2        | 3        |
|----------------------------------------------|-----------------------------|----------|----------|
|                                              | A                           | A        | A        |
| Frequencies --                               | 50.4181                     | 447.5707 | 611.1940 |
| Red. masses --                               | 1.0873                      | 3.0453   | 2.7933   |
| Zero-Point Correction=                       | 0.048453 (Hartree/Particle) |          |          |
| Thermal correction to Energy=                | 0.053585                    |          |          |
| Thermal correction to Enthalpy=              | 0.054640                    |          |          |
| Thermal correction to Gibbs Free Energy=     | 0.017244                    |          |          |
| Sum of electronic and zero-point Energies=   | -228.578257                 |          |          |
| Sum of electronic and thermal Energies=      | -228.573125                 |          |          |
| Sum of electronic and thermal Enthalpies=    | -228.572070                 |          |          |
| Sum of electronic and thermal Free Energies= | -228.609466                 |          |          |

| Item          | Value    | Threshold | Converged? |
|---------------|----------|-----------|------------|
| Maximum Force | 0.000001 | 0.000015  | YES        |
| RMS Force     | 0.000000 | 0.000010  | YES        |

**Int\_b\_fast**

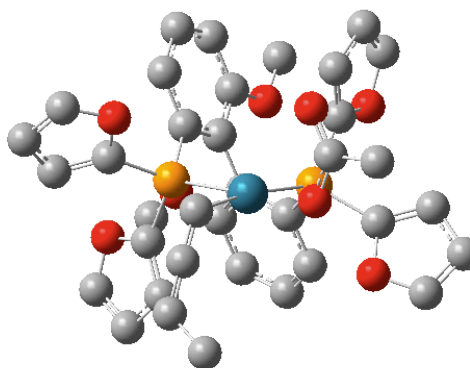

-----  
 Cartesian coordinates (Angstroms):  
 -----

Pd 1.730 0.051 -0.244  
 P 0.103 -1.701 0.324  
 O -1.713 -3.421 -0.853

O -4.031 1.296 1.182  
 O 1.693 -2.684 2.313  
 C -0.628 -2.598 -1.057  
 C -0.248 -2.647 -2.373  
 H 0.594 -2.118 -2.797  
 C -1.151 -3.548 -3.020  
 H -1.157 -3.833 -4.062  
 C -2.013 -3.982 -2.056  
 H -2.855 -4.658 -2.062  
 C -1.287 -1.086 1.378  
 C -2.212 -0.158 0.863  
 C -3.168 0.407 1.742  
 C -3.193 0.052 3.095  
 H -3.924 0.484 3.767  
 C -2.267 -0.869 3.581  
 H -2.290 -1.146 4.631  
 C -1.317 -1.435 2.737  
 H -0.602 -2.142 3.138  
 C -5.021 1.901 2.008  
 H -5.695 1.154 2.441  
 H -5.589 2.564 1.354  
 H -4.565 2.490 2.813  
 C 0.855 -3.044 1.284  
 C 2.206 -3.833 2.836  
 H 2.884 -3.709 3.666  
 C 1.724 -4.918 2.168  
 H 1.961 -5.954 2.366  
 C 0.845 -4.408 1.159  
 H 0.276 -4.978 0.440  
 P 0.137 1.707 -0.422  
 O -1.403 3.311 1.203  
 O -4.199 -1.169 -0.648  
 O 1.296 2.960 -2.560  
 C -0.330 2.450 1.151  
 C 0.257 2.371 2.386  
 H 1.126 1.778 2.633  
 C -0.495 3.224 3.250  
 H -0.323 3.408 4.301  
 C -1.484 3.764 2.483  
 H -2.288 4.456 2.686  
 C -1.393 1.067 -1.243  
 C -2.291 0.201 -0.590  
 C -3.365 -0.346 -1.336  
 C -3.527 -0.042 -2.692  
 H -4.348 -0.462 -3.259  
 C -2.620 0.811 -3.317  
 H -2.744 1.046 -4.370  
 C -1.559 1.363 -2.607  
 H -0.862 2.014 -3.118  
 C -5.301 -1.756 -1.333  
 H -5.986 -0.993 -1.721  
 H -5.821 -2.365 -0.593  
 H -4.966 -2.396 -2.158  
 C 0.594 3.169 -1.397  
 C 1.546 4.183 -3.104  
 H 2.096 4.180 -4.033  
 C 1.028 5.169 -2.320  
 H 1.081 6.233 -2.503

C 0.407 4.513 -1.211  
 H -0.117 4.975 -0.387  
 C 3.194 1.467 -0.487  
 C 3.762 2.016 0.541  
 H 3.497 1.636 -1.518  
 C 4.317 2.554 1.613  
 H 3.944 3.517 1.968  
 C 5.458 1.948 2.394  
 O 3.299 -1.402 -0.256  
 C 3.577 -1.918 -1.406  
 C 4.730 -2.922 -1.403  
 O 2.988 -1.664 -2.476  
 H 5.515 -2.570 -2.080  
 H 4.374 -3.883 -1.786  
 H 5.150 -3.062 -0.406  
 H 5.763 0.987 1.971  
 H 5.175 1.787 3.443  
 H 6.330 2.614 2.402

|                                              | 1       | 2       | 3            |
|----------------------------------------------|---------|---------|--------------|
|                                              | A       | A       | A            |
| Frequencies --                               | 11.9377 | 18.3866 | 20.7172      |
| Red. masses --                               | 5.5022  | 4.9158  | 4.2895       |
| ZERO-POINT CORRECTION=                       |         |         | 0.599041     |
| (HARTREE/PARTICLE)                           |         |         |              |
| Thermal correction to Energy=                |         |         | 0.656549     |
| Thermal correction to Enthalpy=              |         |         | 0.657604     |
| Thermal correction to Gibbs Free Energy=     |         |         | 0.496349     |
| Sum of electronic and zero-point Energies=   |         |         | -2801.655635 |
| Sum of electronic and thermal Energies=      |         |         | -2801.598127 |
| Sum of electronic and thermal Enthalpies=    |         |         | -2801.597072 |
| Sum of electronic and thermal Free Energies= |         |         | -2801.758327 |

| ITEM          | VALUE    | THRESHOLD | CONVERGED? |
|---------------|----------|-----------|------------|
| MAXIMUM FORCE | 0.000006 | 0.000450  | YES        |
| RMS FORCE     | 0.000001 | 0.000300  | YES        |

Int\_b\_slow

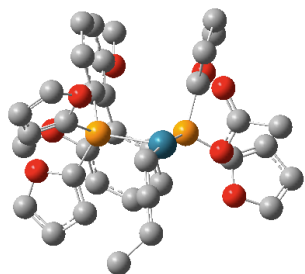

-----  
 Cartesian coordinates (Angstroms):  
 -----

Pd -1.730 0.258 -0.223  
 P 0.171 1.701 0.372  
 O 2.237 3.103 -0.815  
 O 3.766 -1.955 1.075  
 O -1.204 2.904 2.403  
 C 1.018 2.492 -1.008  
 C 0.618 2.654 -2.309  
 H -0.318 2.300 -2.720  
 C 1.649 3.402 -2.958  
 H 1.678 3.717 -3.992  
 C 2.600 3.643 -2.011  
 H 3.548 4.160 -2.024  
 C 1.458 0.841 1.382  
 C 2.207 -0.215 0.828  
 C 3.072 -0.951 1.674  
 C 3.179 -0.639 3.034  
 H 3.841 -1.202 3.680  
 C 2.429 0.411 3.558  
 H 2.517 0.657 4.613  
 C 1.570 1.148 2.747  
 H 0.990 1.954 3.178  
 C 4.655 -2.738 1.866  
 H 5.452 -2.126 2.302  
 H 5.093 -3.469 1.186  
 H 4.120 -3.263 2.667  
 C -0.324 3.132 1.371  
 C -1.491 4.113 2.962  
 H -2.171 4.093 3.799  
 C -0.825 5.109 2.313  
 H -0.865 6.164 2.541  
 C -0.065 4.474 1.280  
 H 0.592 4.948 0.567  
 P -0.434 -1.638 -0.452  
 O 0.828 -3.511 1.123  
 O 4.301 0.513 -0.702  
 O -1.794 -2.648 -2.601  
 C -0.074 -2.472 1.103  
 C -0.607 -2.300 2.353  
 H -1.341 -1.557 2.629  
 C 0.001 -3.283 3.194  
 H -0.175 -3.443 4.248

C 0.858 -3.984 2.399  
 H 1.528 -4.812 2.576  
 C 1.168 -1.240 -1.289  
 C 2.203 -0.545 -0.634  
 C 3.338 -0.155 -1.390  
 C 3.428 -0.450 -2.754  
 H 4.296 -0.151 -3.328  
 C 2.389 -1.134 -3.380  
 H 2.458 -1.363 -4.439  
 C 1.264 -1.527 -2.662  
 H 0.464 -2.046 -3.173  
 C 5.462 0.952 -1.402  
 H 6.020 0.109 -1.824  
 H 6.080 1.459 -0.662  
 H 5.203 1.655 -2.202  
 C -1.141 -2.988 -1.440  
 C -2.263 -3.803 -3.153  
 H -2.802 -3.694 -4.081  
 C -1.933 -4.871 -2.375  
 H -2.178 -5.906 -2.564  
 C -1.203 -4.345 -1.262  
 H -0.772 -4.900 -0.443  
 C -3.409 -0.889 -0.508  
 C -4.204 -1.122 0.490  
 H -3.592 -1.222 -1.526  
 C -4.995 -1.324 1.529  
 O -3.015 1.968 -0.162  
 C -3.216 2.561 -1.290  
 C -4.164 3.758 -1.232  
 O -2.701 2.240 -2.380  
 H -4.968 3.619 -1.962  
 H -3.617 4.664 -1.517  
 H -4.594 3.896 -0.239  
 C -4.943 -2.524 2.444  
 H -5.764 -0.580 1.748  
 H -4.788 -2.217 3.486  
 H -4.135 -3.205 2.163  
 H -5.887 -3.083 2.418

|                                              | 1       | 2       | 3            |
|----------------------------------------------|---------|---------|--------------|
|                                              | A       | A       | A            |
| Frequencies --                               | 14.0541 | 18.2832 | 21.8989      |
| Red. masses --                               | 5.5508  | 4.0870  | 5.0110       |
| ZERO-POINT CORRECTION=                       |         |         | 0.599257     |
| (HARTREE/PARTICLE)                           |         |         |              |
| Thermal correction to Energy=                |         |         | 0.656622     |
| Thermal correction to Enthalpy=              |         |         | 0.657677     |
| Thermal correction to Gibbs Free Energy=     |         |         | 0.497330     |
| Sum of electronic and zero-point Energies=   |         |         | -2801.655382 |
| Sum of electronic and thermal Energies=      |         |         | -2801.598016 |
| Sum of electronic and thermal Enthalpies=    |         |         | -2801.596961 |
| Sum of electronic and thermal Free Energies= |         |         | -2801.757309 |

| ITEM          | VALUE    | THRESHOLD | CONVERGED? |
|---------------|----------|-----------|------------|
| MAXIMUM FORCE | 0.000013 | 0.000450  | YES        |
| RMS FORCE     | 0.000002 | 0.000300  | YES        |

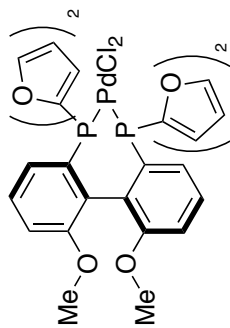

3  
Table 1

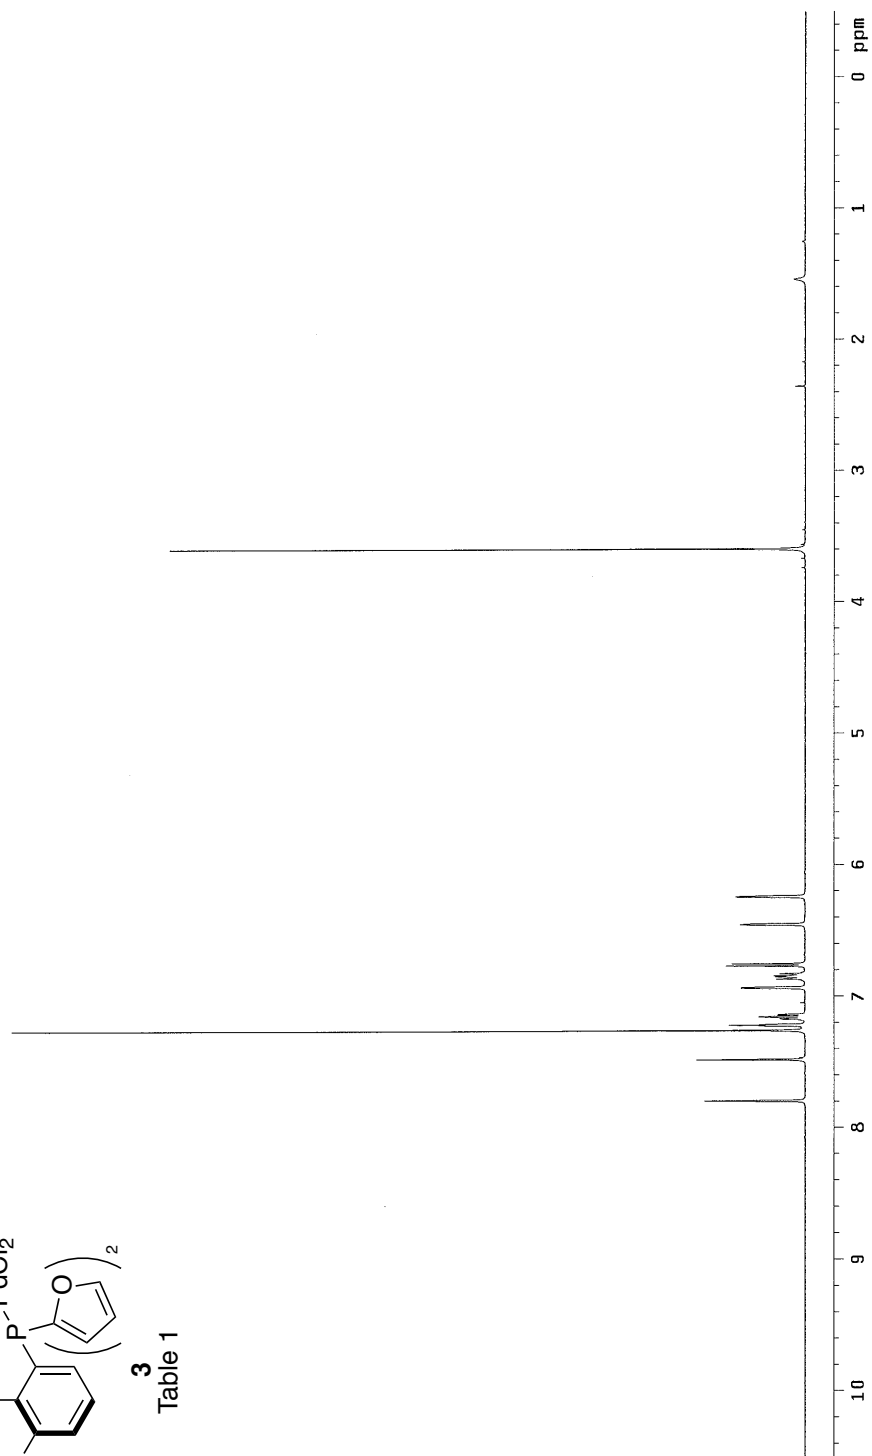





**3**  
Table 1

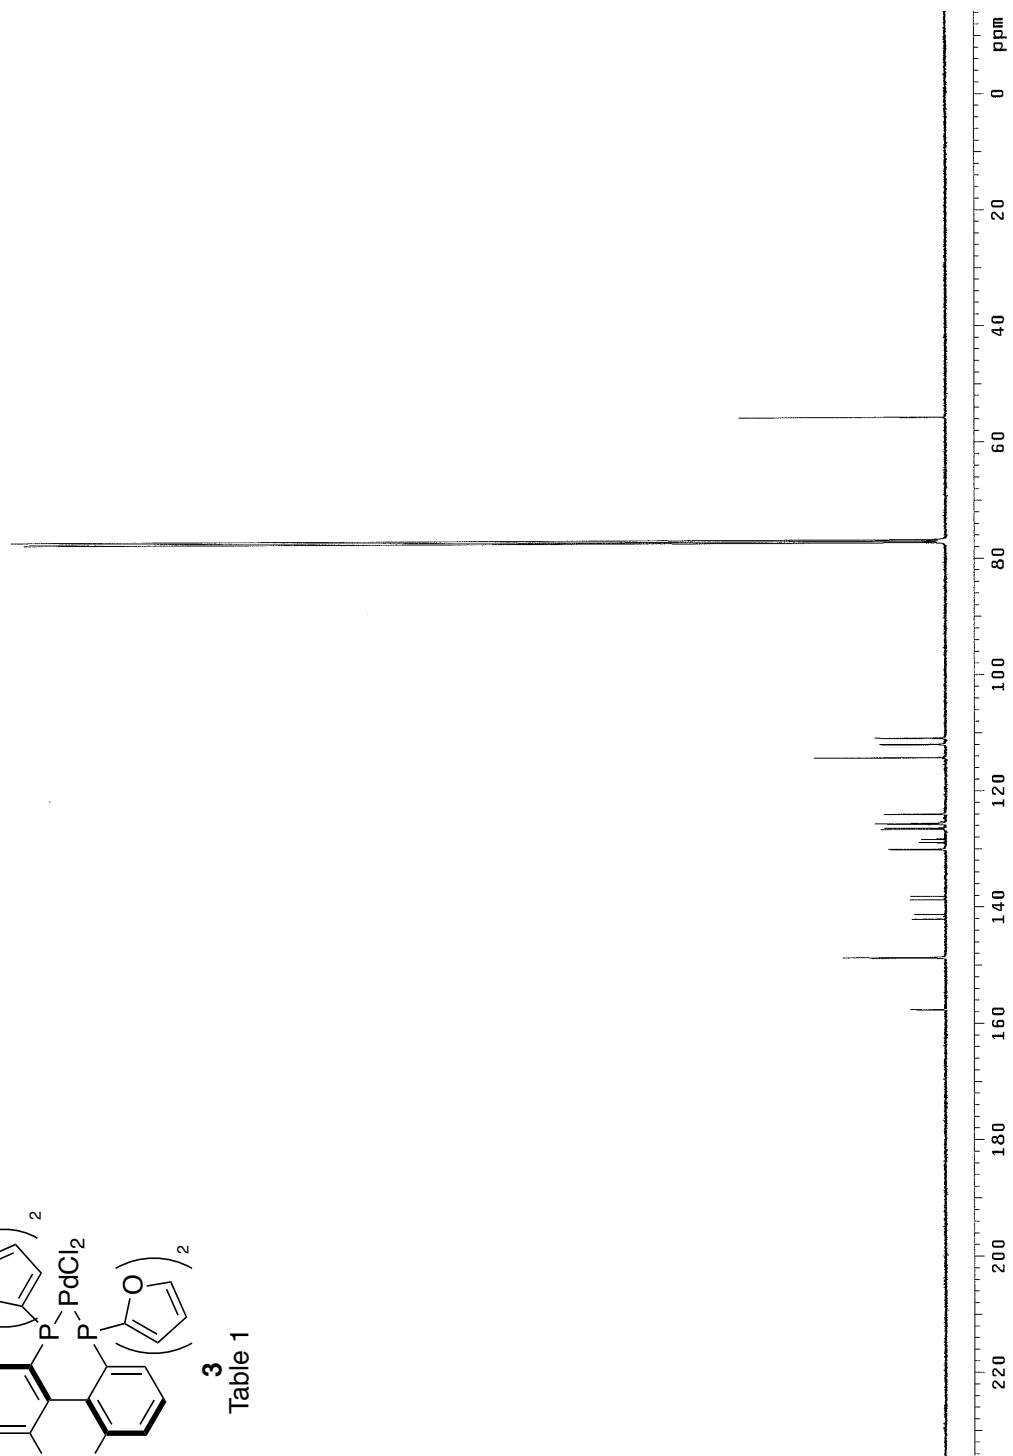

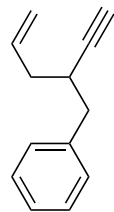

Table 2  
Entry 5 G

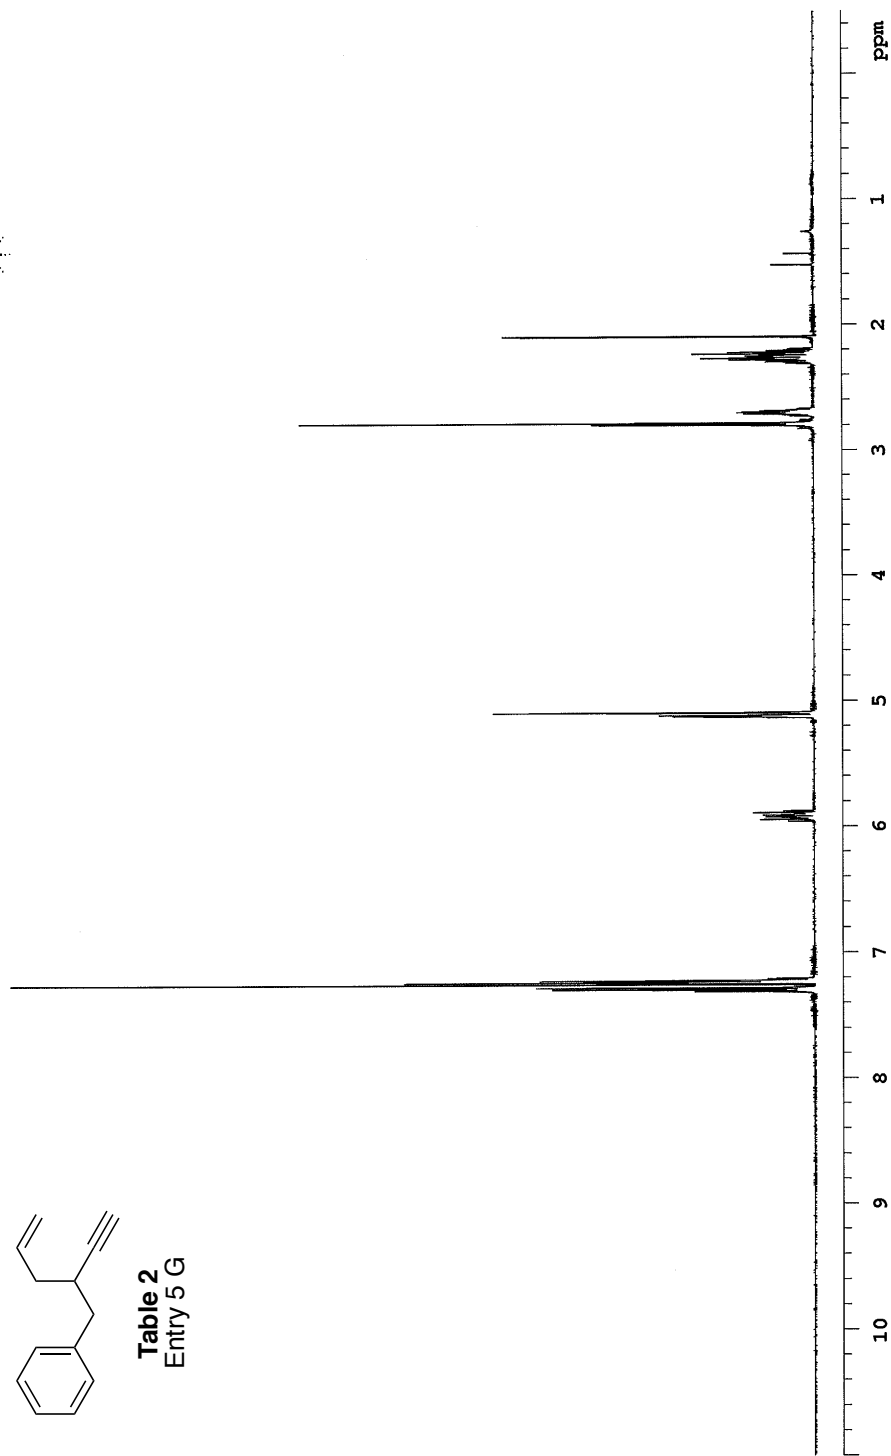

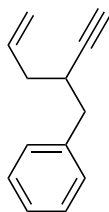

Table 2  
Entry 5 G

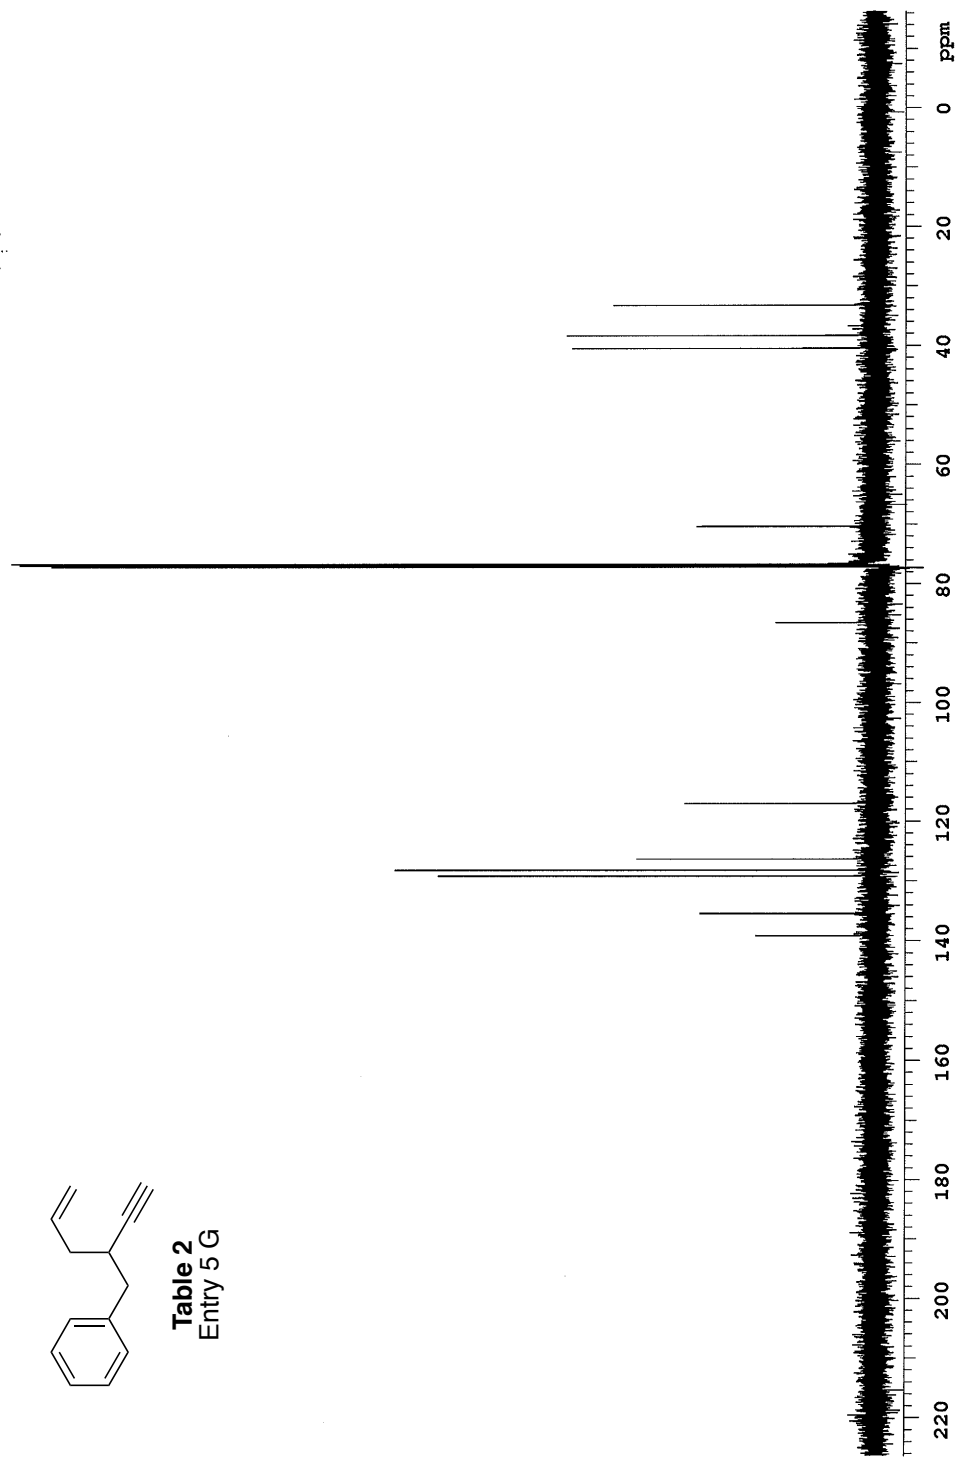

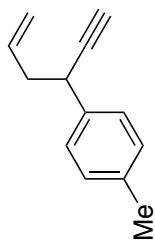

Table 2  
Entry 10 G

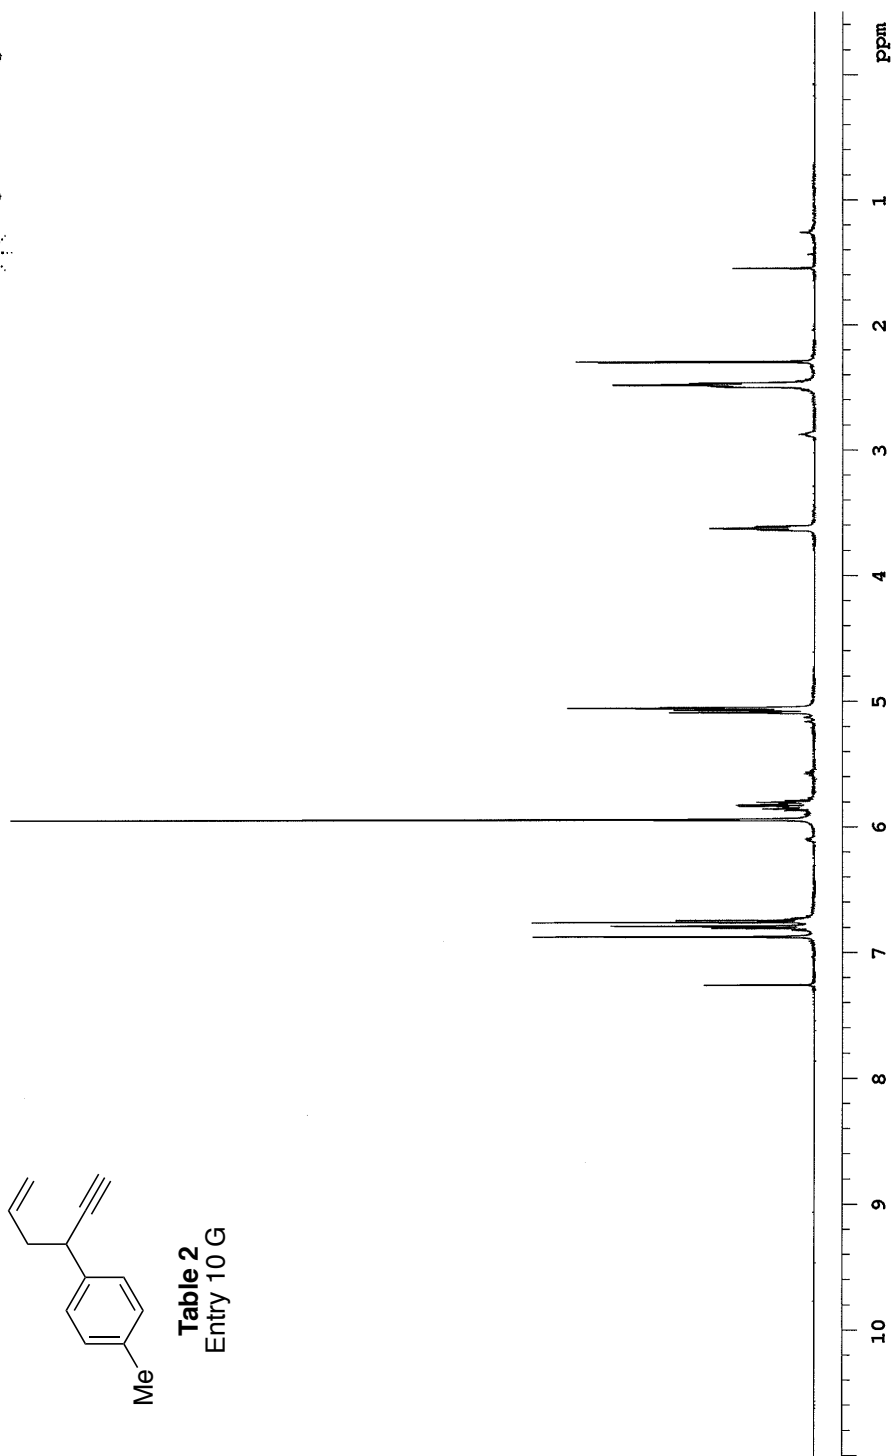



Table 2  
Entry 10 G

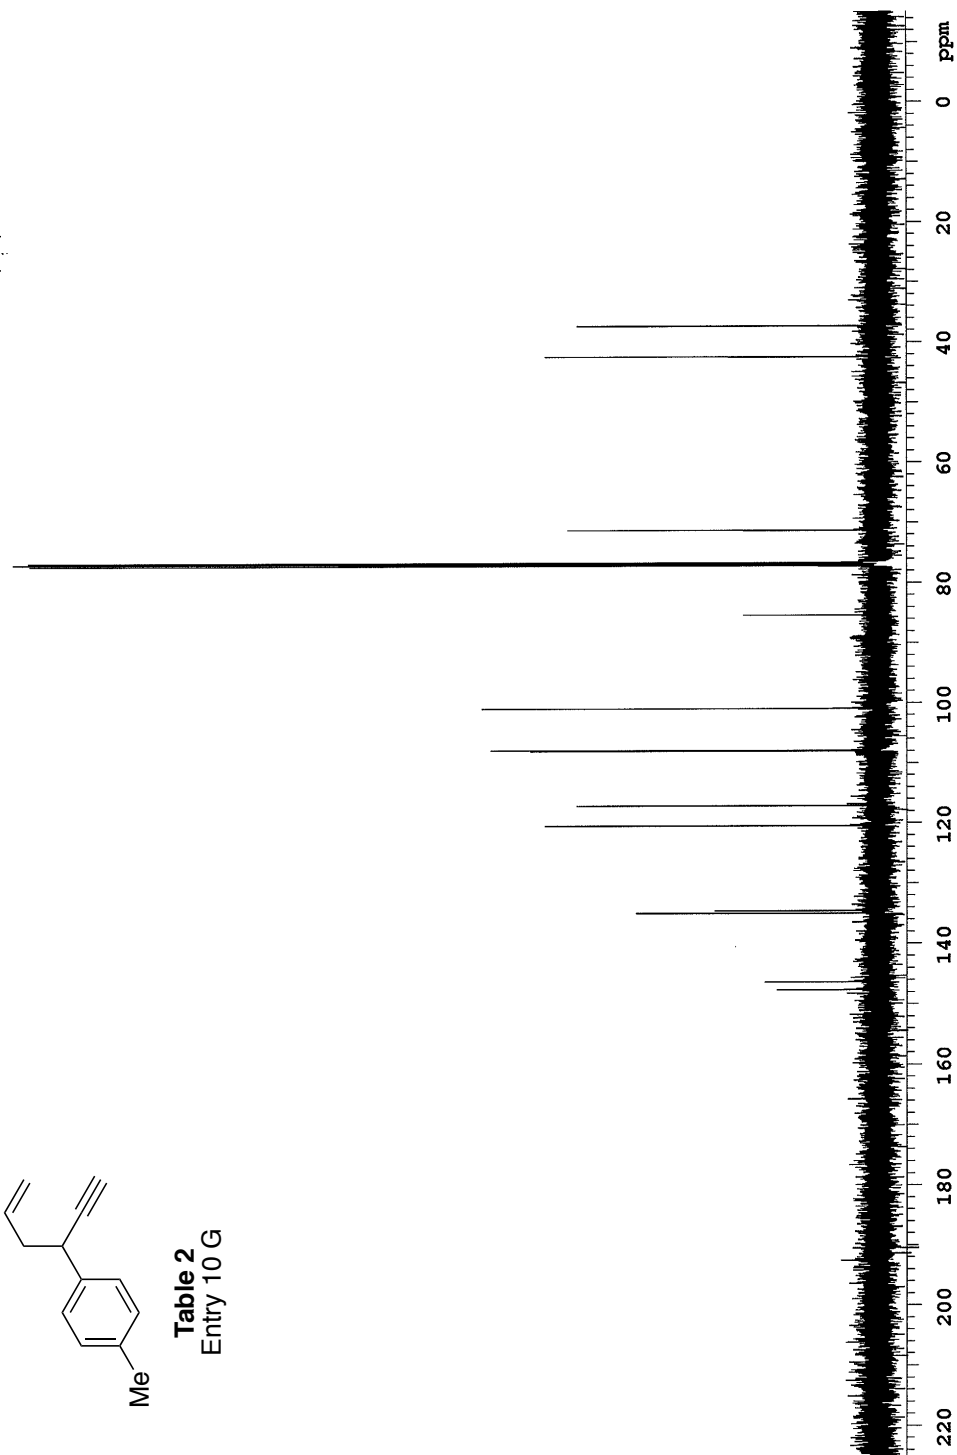

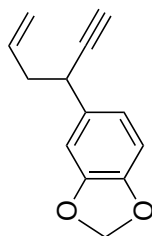

Table 2  
Entry 13 G

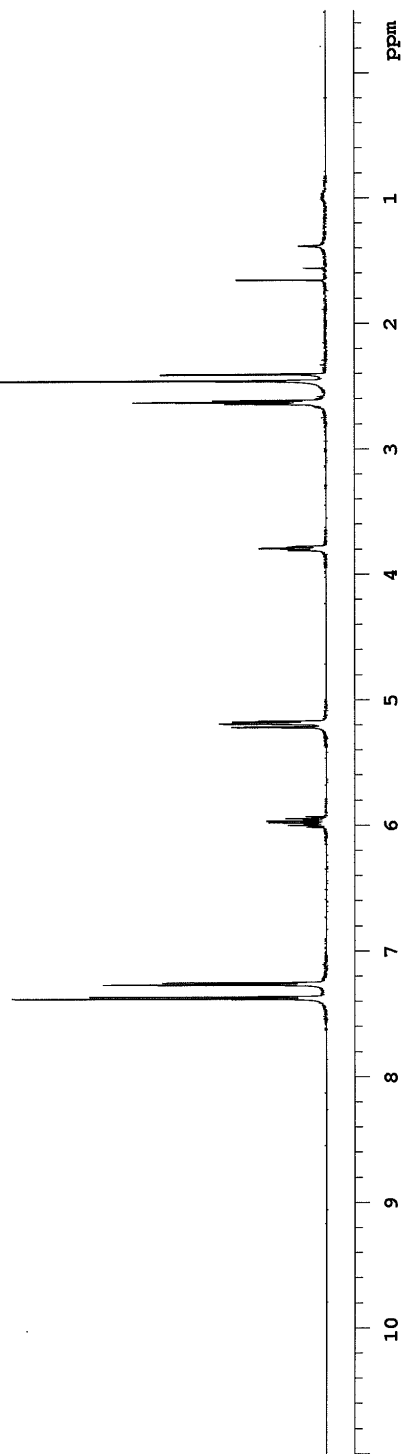

Table 2  
Entry 13 G



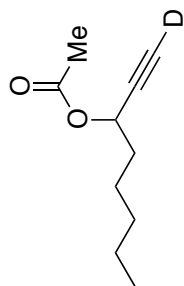

**Scheme 3**  
d-1

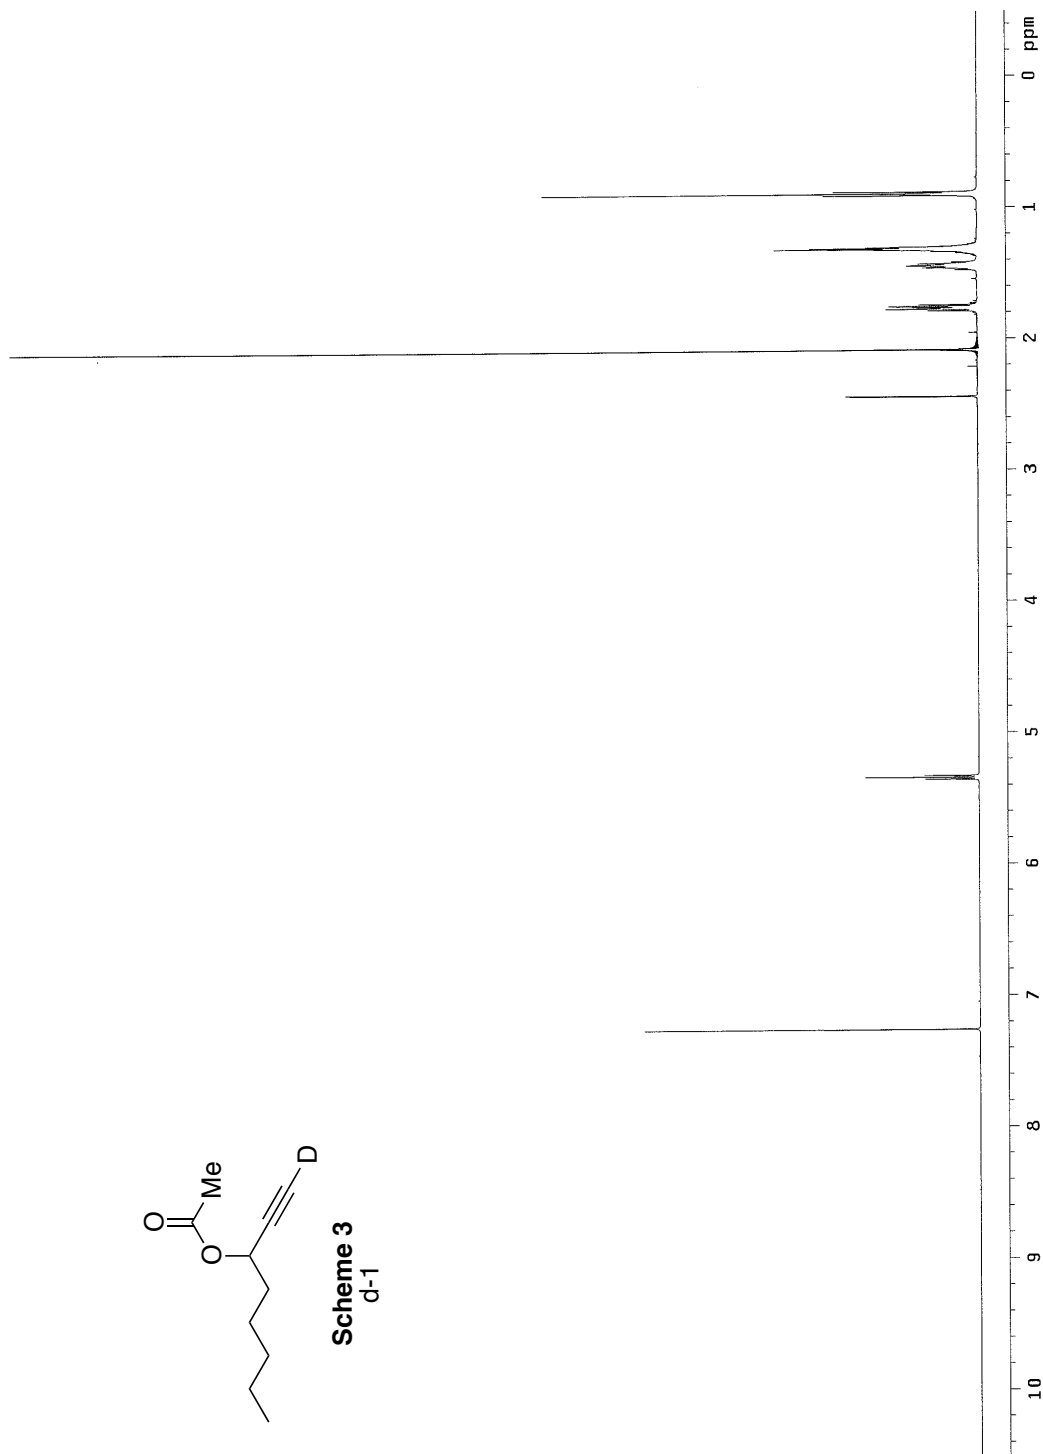



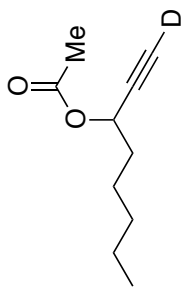

**Scheme 3**  
d-1

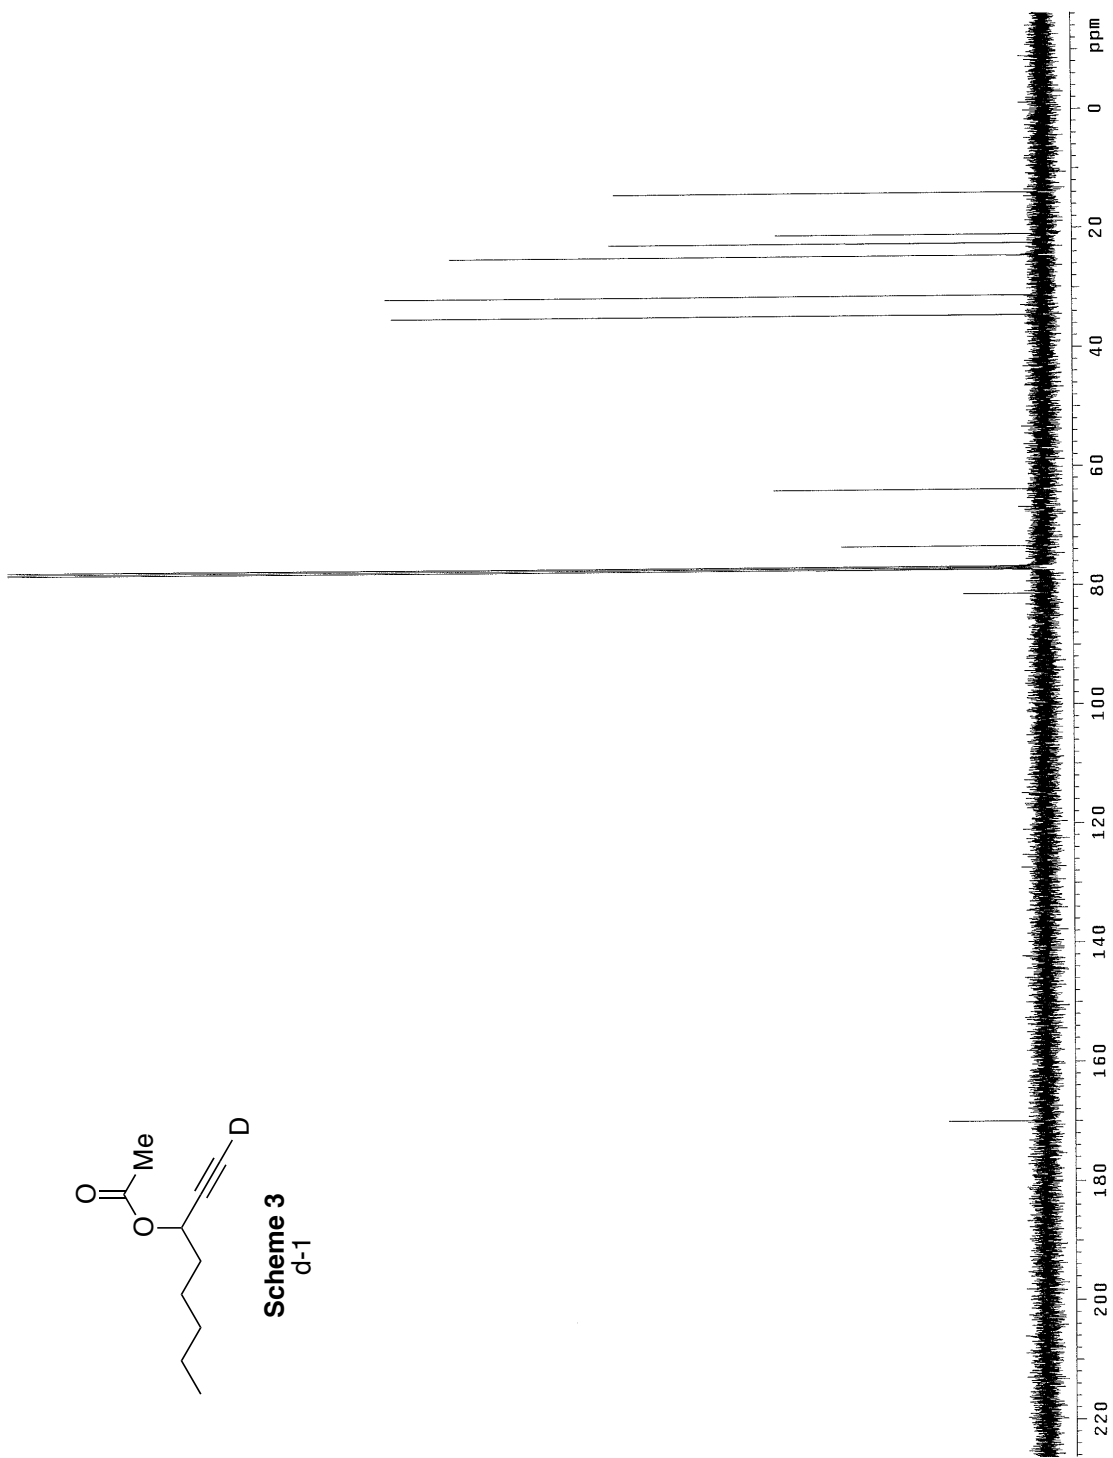

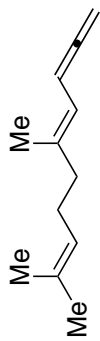

Table 3  
Entry 5 L

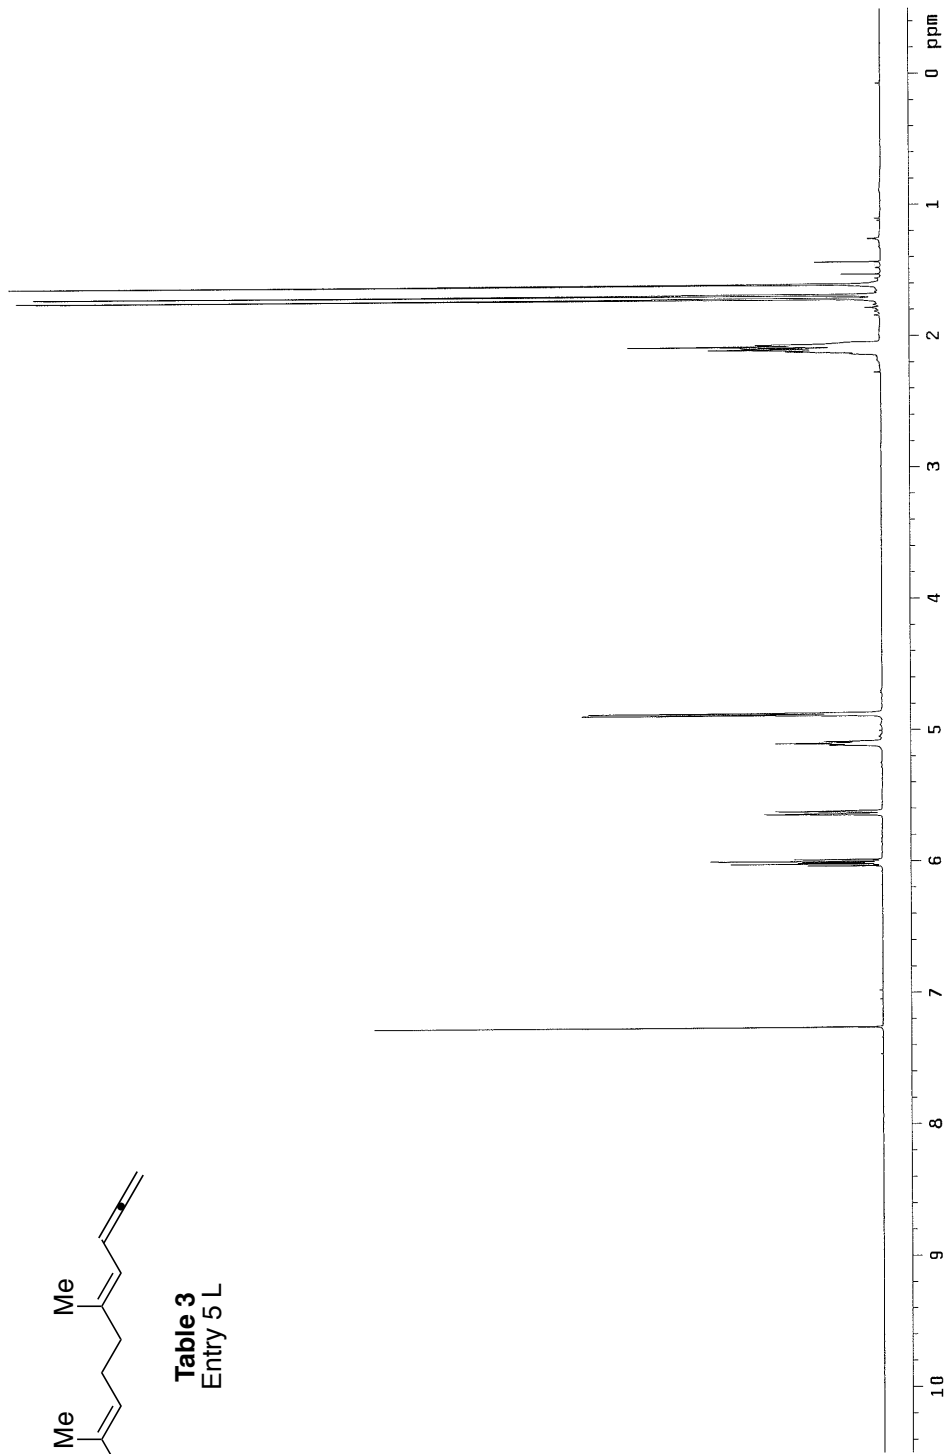

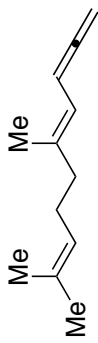

Table 3  
Entry 5 L

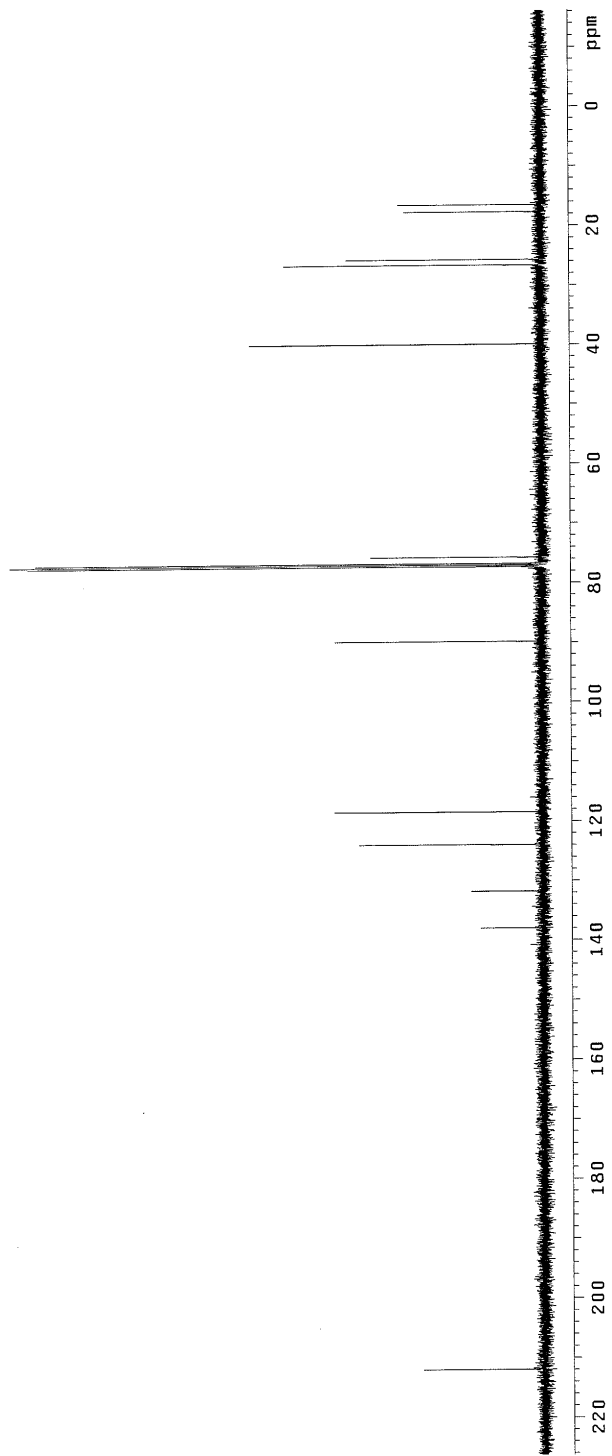

Supplement: NIHMS565534-supplement-Supporting_Information.pdf [file NIHMS565534-supplement-Supporting_Information.pdf]
